# Supplementary material for: How to improve your metocean datasets
Source: Copernicus journal article supplement (doi:10.5194/wes-2019-42), 2019-07-26
Supplement: Supplementary file [file wes-2019-42-RC1-supplement.pdf]

Dear authors, thank you for writing this interesting article. I have been kindly asked to review it and to provide my comments. I have done so directly into the pdf document, see the attached supplement (it includes typos and other minor comments). You will find below some general comments, as well as for each section of the paper a detailed description of the comments that are, in my opinion, the most important and that need be addressed.

### **General comments:**

This article fits well within the scope of the WES journal, as it provides both a detailed technical insight into a key activity (measurements), provides some rigorous analytical approach to quantifying uncertainties, and concludes by making recommendations on how to improve measurement campaigns. The paper is long, but very interesting. I can relate to the work that was carried out, it followed some rigorous- and well documented steps, and provide a valid set of recommendations which could form the basis for data specifications scope of works on future campaigns. A number of aspects could be improved though, so as to best reach out to the readers of WES:

- A clearer definition of “data”, and some more detailed information on the value of the data of each sensor given the different contexts (offshore wind projects, science, etc); see Comment 1.1,
- The inclusion of the project owner as a key stakeholder in the description of these measurement projects, and thereby a better definition of the word “data provider”; see Comment 1.2,
- Making references to the industry standards for the quantification of uncertainties, as well as to the scientific literature about sensor uncertainty (this need be done in particular for cup anemometers, in my opinion); see Comment 2.1,
- Revising the wording and the argumentation so as to maximise the chances for the set of recommendations to be implemented in future campaigns; See Comment 4.1.

### **Specific comments:**

#### **Section 1:**

I have two main comments in this Section. The first one deals with the definition and use of metocean data, the second deals with the general setup of such measurement campaigns.

*Comment 1.1:* The term metocean data should be defined in this Section, as the word “data” could also be understood as model data, while the article deals with measurements. The text describing the measurement data could also include a longer list of analysis carried out using the datasets, and rank them by order of importance for research and commercial purposes. This, in my opinion, would provide a better frame for the argumentation in the paper. For instance for wind resource and design work, 10-minute wind speed- and direction measurements, turbulence intensity and ca. 30-minute spectral wave measurements, and currents, are by far some of the most important ones, and require extreme caution. On the other hand, precipitation or humidity sensors, and to some extent temperature sensors, are typically given much less attention. For research work, purposes may vary and thereby the paper could argue in favour or setting all measurement signals on equal foot, but this needs be made clear and be argued. In effect, one could argue that priority should be given

to the sensors measuring the quantities at play in the phenomena that drive the marine boundary layer (i.e. momentum- and heat mean- and turbulent fluxes, sea surface roughness), and at the right temporal resolution (for turbulence spectra, 10-minute statistics are not enough for instance). Overall, this argumentation and hierarchisation of the measurements is missing, and could be provided by referring to specific sections of the international power performance- and design standards (respectively IEC61400-12 and IEC61300-3), and to the scientific literature (for instance [BEEKEN1]) where the original goals of these campaigns are described.

*Comment 1.2:* You write: “In this section we also mention options for addressing issues described where it can be done compactly and where we believe it adds value for dataset producers.” I will come back to this at a later stage of the review, but it is important to single out the role of the project owner (i.e. the entity who ordered the campaign), which has a particular role in the project, that is: writing the technical scope of works, which then become part of the contract(s) between the project owner and the compan(ies) carrying out the campaign (mast designers, instrumentation providers, etc). To make it simple: contractors (it can be the measurement department from a university, or a private company), should legally do what has been agreed in the SoW, and their performance is measured accordingly. In the article, the term “data producer” is ambiguous, as it can refer both the entity making the data available, or the contractor in charge of the work, or both. This should be clarified, because a clear understanding of the split of responsibilities and of the interfaces between the actors, would help the reader argue for, and implement all the good ideas which you present in the article.

## Section 2.

*Comment 2.1:* Section 2 starts with a detailed description of the data, then its processing and filtering, and finishes with Table 3 and a discussion on uncertainties after having presented both the inputs and methods used for obtaining these results. This is a very good structure. Just, I would like to point out two things:

First, the results would benefit from the framing of the argumentation mentioned in my comment 1.1 (i.e. what are the most important sensors and statistics, and how a possible error in one of the statistics would impact projects and research works). Once some relevant text added in Section 1, you could refer to it and add weight to the argumentation at the end of the Section (on the  $Tl$  values for instance).

Second, the derivation of the uncertainty is done without referring to the industry standards, and also lacks sensor-specific (in particular for cups) references to the existing literature. I understand the article treats all sensors on equal foot and makes the same assumption (sum of two gaussian noise components, one driven by the absolute error and one relative error, both errors coming from the specification sheets); this approach is interesting but unfortunately a comparison with the existing industry standards is missing to make it relevant for the audience of this paper (scientists and practitioners in Wind Energy). If I take the example of the cup anemometer, which, as mentioned above, is by far the most important type of sensor on this mast for both research- and industry work:

- Its behaviour and uncertainties (including 10-minute standard deviation) are well described in a number of scientific papers (see [KRISTENSEN1] and [PINDADO1] for instance),

- The IEC61400-12 standards contain specific sections dealing with the uncertainty cup anemometer measurements, relying on the work carried out in test facilities (MEASNET) and in research labs (see [ACCUWIND] for instance),
- Specification sheets are rarely trusted 😊

By including these references to the literature, you will also be able to fine-tune the inputs to your uncertainty model. And, above all, you would help the reader by providing a comparison of the assumptions, methods and results obtained in the paper with the ones obtained using the industry standard methods and results, in particular for cup anemometers (which has been, and still is actually, a reference measurement sensor for many analyses).

As to the methods and results presented in the Appendix, I followed (with difficulty, towards the end) the maths but eventually also carried out a few tests using random wind time series of 10-minute durations. I checked that the results I obtained were of the same order of magnitude as in Table 3<sup>1</sup>, and also checked that the modelled measured time series (true signal + noise) kept the same spectral properties (it could have been another kind of uncertainty to touch upon). You could provide such short examples in the form of a Python code, for the user to play with.

#### Section 4.

*Comment 4.1:* For the sake of the efficiency of your argumentation, as I mentioned in my comment in Section 1, I think this Section could be reformulated as:

- The opportunities and benefits for all parties (project owner, contactor and analysis) of doing what you suggest,
- The likely, underlying causes for the deficiencies you have observed (spoiler: a lot has to do with the scope of work),
- The barriers to change and means to resolves them.

As mentioned in the “General comments” section, the tone of some phrases and expressions may neither be appropriate nor efficient for your purpose. Many have gone through the steps you describe, including myself. With time, doing so repeatedly project after project (these are widespread issues in geosciences and technologies in general) has moved us closer to the community of site investigations-, tests- and measurement professionals, their clients, and eventually to the standards requirements, assumptions and methods from our own community of wind & site conditions professionals. That is to say: solving the issues you bring up is a shared responsibility.

That being said, and once acknowledged that despite the great talent, efforts and energy deployed for making these offshore campaigns a success<sup>2</sup>, “*Monitoring [remains] science’s Cinderella*” [NISBET1]. That is: no grand plan is likely to help. The industry has its standards, and cannot really take-in more normative requirements in my opinion. There are already some informative guidelines about data sharing and good practices, you could also mention them, for instance see FAIR DATA [VASILJEVIC1]. Differences in quality and validity of the data should be made on a project-specific basis, within a limited, reasonable and cost-effective scope of work, as part of a contract between

---

<sup>1</sup> About this Table: please provide some simple numerical examples, so the reader understands clearly how to derive these uncertainty numbers using the absolute and relative error stated in Table1, but also the assumed sample mean and std used of the examples (at least for the cup).

<sup>2</sup> See videos of the FINO masts on <https://www.youtube.com/user/FinoForschung/videos> (for instance the nice “FINO2 Im Bann der Jahreszeiten” or the impressive “FINO3 - Sturm bei Einsatz mit Sattetechnik”). In a completely different style, see these videos depicting the Fuhai met mast in Taiwan: <https://www.youtube.com/watch?v=mr2q63GnRms>, [https://www.youtube.com/watch?v=3\\_sgP48zsnU](https://www.youtube.com/watch?v=3_sgP48zsnU).

two entities to which your work can contribute. I give an example from RVO about a recent floating LiDAR campaign in the pdf.

|               |                                                                                                                                                                                                                                                                                       |
|---------------|---------------------------------------------------------------------------------------------------------------------------------------------------------------------------------------------------------------------------------------------------------------------------------------|
| [BEEKEN1]     | FIVE YEARS OF OPERATION OF THE FIRST OFFSHORE WIND RESEARCH PLATFORM IN THE GERMAN. BIGHT – FINO1. Link:<br><a href="https://www.dewi.de/dewi/fileadmin/pdf/publications/Publikations/5_Beeken.pdf">https://www.dewi.de/dewi/fileadmin/pdf/publications/Publikations/5_Beeken.pdf</a> |
| [KRISTENSEN1] | The Perennial Cup Anemometer. Link:<br><a href="http://www.windsensor.com/application/files/9514/2694/4640/The_Perennial_Cup_Anemometer.pdf">http://www.windsensor.com/application/files/9514/2694/4640/The_Perennial_Cup_Anemometer.pdf</a>                                          |
| [PINDADO1]    | The Cup Anemometer, a Fundamental Meteorological Instrument for the Wind Energy Industry. Research at the IDR/UPM Institute.<br><a href="https://www.ncbi.nlm.nih.gov/pubmed/25397921">https://www.ncbi.nlm.nih.gov/pubmed/25397921</a>                                               |
| [ACCUWIND]    | ACCUWIND - Methods for classification of cup anemometers.<br><a href="https://orbit.dtu.dk/files/7703258/ris_r_1555.pdf">https://orbit.dtu.dk/files/7703258/ris_r_1555.pdf</a> .                                                                                                      |
| [NISBET1]     | Cinderella science. <a href="https://www.nature.com/articles/450789a">https://www.nature.com/articles/450789a</a>                                                                                                                                                                     |
| [VASILJEVIC1] | Exploring the FAIR data principles across disciplines: Case DTU Wind Energy.<br><a href="https://zenodo.org/record/1493874">https://zenodo.org/record/1493874</a>                                                                                                                     |

### **Rating**

From [https://www.wind-energy-science.net/peer\\_review/review\\_criteria.html](https://www.wind-energy-science.net/peer_review/review_criteria.html).

Scientific significance: Good (2). This is thanks to the derivation of uncertainties in Section 2, which the authors claim is original (I could not verify this within the review time). There is some value for the reader to understand the proposed approach, in my opinion.

Scientific quality: Good (2). The work is rigorous and reproduceable thanks to the code made available.

Presentation quality: Poor (4). I recommend to change the tone of some phrases and expressions (see my comments in the pdf), and also recommend to shorten the text where possible (the article is a little long, this and may discourage the readers having little time available to deep-dive into articles).

### **Additional questions:**

1. *Does the paper address relevant scientific questions within the scope of WES?*  
Yes.
2. *Does the paper present novel concepts, ideas, tools, or data?*  
Yes.
3. *Is the paper of broad international interest?*  
Yes.
4. *Are clear objectives and/or hypotheses put forward?*  
Yes.
5. *Are the scientific methods valid and clear outlined to be reproduced?*  
Yes.
6. *Are analyses and assumptions valid?*

Most likely (numerical examples for uncertainty calculations, for ex. short python codes, would help the reader.

7. *Are the presented results sufficient to support the interpretations and associated discussion?*  
Yes.
8. *Is the discussion relevant and backed up?*  
Not entirely, because the paper is missing references and comparison to the existing industry standards on how to report and calculate uncertainties.
9. *Are accurate conclusions reached based on the presented results and discussion?*  
See no.8.
10. *Do the authors give proper credit to related and relevant work and clearly indicate their own original contribution?*  
Yes.
11. *Does the title clearly reflect the contents of the paper and is it informative?*  
See my comment in the pdf. Title may need be changed.
12. *Does the abstract provide a concise and complete summary, including quantitative results?*  
Yes.
13. *Is the overall presentation well structured?*  
Not entirely, see criteria "Presentation quality" above.
14. *Is the paper written concisely and to the point?*  
Not entirely, see criteria "Presentation quality" above.
15. *Is the language fluent, precise, and grammatically correct?*  
Yes.
16. *Are the figures and tables useful and all necessary?*  
Yes.
17. *Are mathematical formulae, symbols, abbreviations, and units correctly defined and used according to the author guidelines?*  
Yes (a few typos though, see pdf).
18. *Should any parts of the paper (text, formulae, figures, tables) be clarified, reduced, combined, or eliminated?*  
No.
19. *Are the number and quality of references appropriate?*  
See no. 8.
20. *Is the amount and quality of supplementary material appropriate and of added value?*  
See no.6

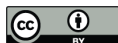

# How to improve your metocean datasets

Erik Quaeghebeur\* and Michiel B. Zaaijer\*

\*Wind Energy Section, Delft University of Technology, Kluyverweg 1, 2629 HS Delft, the Netherlands

**Correspondence:** Erik Quaeghebeur (E.R.G.Quaeghebeur@tudelft.nl)

**Abstract.** We present an analysis of three metocean datasets of 10-minute statistics and our resulting recommendations to both producers and users of such datasets. Many of our recommendations are more generally of interest to all numerical measurement data producers. The datasets analyzed originate from offshore meteorological masts installed to support offshore wind farm planning and design: the Dutch OWEZ and MMIIJ, and the German FINO 1. Our analysis shows that such datasets contain issues that users should look out for and whose prevalence can be reduced by producers. We also present expressions to derive uncertainty and bias values for the statistics from information typically available about sample uncertainty. We also observe that the format in which the data is disseminated is sub-optimal from the users' perspective and discuss how producers can create more immediately useful dataset files. Effectively, we advocate using an established binary format (HDF5 or netCDF4) instead of the typical text-based one (comma-separated values), as this allows for the inclusion of relevant metadata and the creation of significantly smaller directly accessible dataset files. Next to informing producers of the advantages of these formats, we also provide concrete pointers to their effective use. Our conclusion is that datasets such as the ones we analyzed can be improved substantially in usefulness and convenience with limited effort.

**Key words:** metocean data, wind energy, dataset analysis, binary format, uncertainty, best practices

## 1 Introduction

The planning and design of off-shore wind farms depends heavily on the availability of representative meteorological and ocean or 'metocean' data. For example, the wind resource (the wind speed and direction distribution) at the candidate farm location is used to estimate energy production over the farm's lifetime and information about ocean waves is needed for planning a maintenance strategy.

The data is collected by instruments placed on met-masts or measurement buoys deployed in measurement campaigns ordered by the government or the farm developer and set-up by applied research institutes or companies. The data generated in these campaigns is collected and processed by these research institutes or the farm developer. The datasets produced are often available publicly, although usually with some access and usage restrictions, especially for commercial use.

We became interested in evaluating metocean datasets after encountering a number of issues in a specific dataset, both in data quality as well as in the dissemination format. (Our concrete purpose was to use it for wind farm energy production estimation.)

Discussion with other users of such datasets showed that many found the typical dissemination approach, providing multiple files with comma-separated values, to be inconvenient or even a hindrance to their application. Most were not aware of the



data quality issues we encountered, which can be categorized as faulty data, missing documentation, inappropriate statistic selection, limited data quality information, and suboptimal value encoding.

Therefore, we performed a study of three commonly used metocean datasets to answer essentially the following questions:

(i) Are these issues commonly shared in metocean datasets? (ii) How can the issues that are present be addressed? This paper reports the results of that study. In brief: (i) Yes, there are shared issues, but, not unexpectedly, not all of them in all datasets. (ii) Dataset producers can address the issues with a few non-onerous additions to their creation practice. Next to providing arguments for and detailing these conclusions, this paper is meant to raise awareness of the issues mentioned by giving concrete examples. Furthermore, it provides dataset producers with concrete ideas about how to achieve substantial improvements with reasonable effort.

The users of the produced datasets are of course the farm developers, but also the academic world, whose usage is not necessarily restricted to wind energy applications. The context of our academic research is off-shore wind energy, but the work we present here is relevant outside that area as well. When our discussion goes beyond the analysis of the specific datasets we considered, it is also mostly independent of their metocean nature, but generally applies to any numerical time series data.

To achieve the informative and instructive goals of this paper, we structure the paper into two main sections. We start with an essentially descriptive Sect. 2, to give an overview of the datasets we considered and to identify the issues we encountered. The original contributions here are our thorough description, in-depth analysis, and expressions for the uncertainties and bias for the statistics' values that make up the datasets. In this section we also mention options for addressing issues described where it can be done compactly and where we believe it adds value for dataset producers. In the instructive Sect. 3 we discuss how the format of these datasets can be improved and thereby disseminated more conveniently. This section includes an up-to-date evaluation of binary dataset file format functionality. The recommendations to both dataset producers and users that follow from these analyses are collected at the end of this paper (Sect. 4), preceding the overall conclusions (Sect. 5).

## 2 The Datasets and Their Analysis

We split our discussion of the datasets into two parts: first, in Sect. 2.1, we present the three datasets qua context and content, then, in Sect. 2.2, we go over the issues we encountered.

### 2.1 A First Look at the Datasets

All three datasets we consider come from measuring masts in the North Sea and contain multiple multi-year 10-minute statistics data, 'series'. These 10-minute statistics are derived from higher-frequency measurements, 'signals', of quantities measured by various instruments at various locations on the mast. The available statistics are the sample minimum, maximum, mean, and standard deviation.

For each dataset, we give a brief description of the measurement site and setup, list the measurement period and quantities measured, describe the dissemination approach, point to available documentation, and highlight some further important aspects.

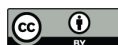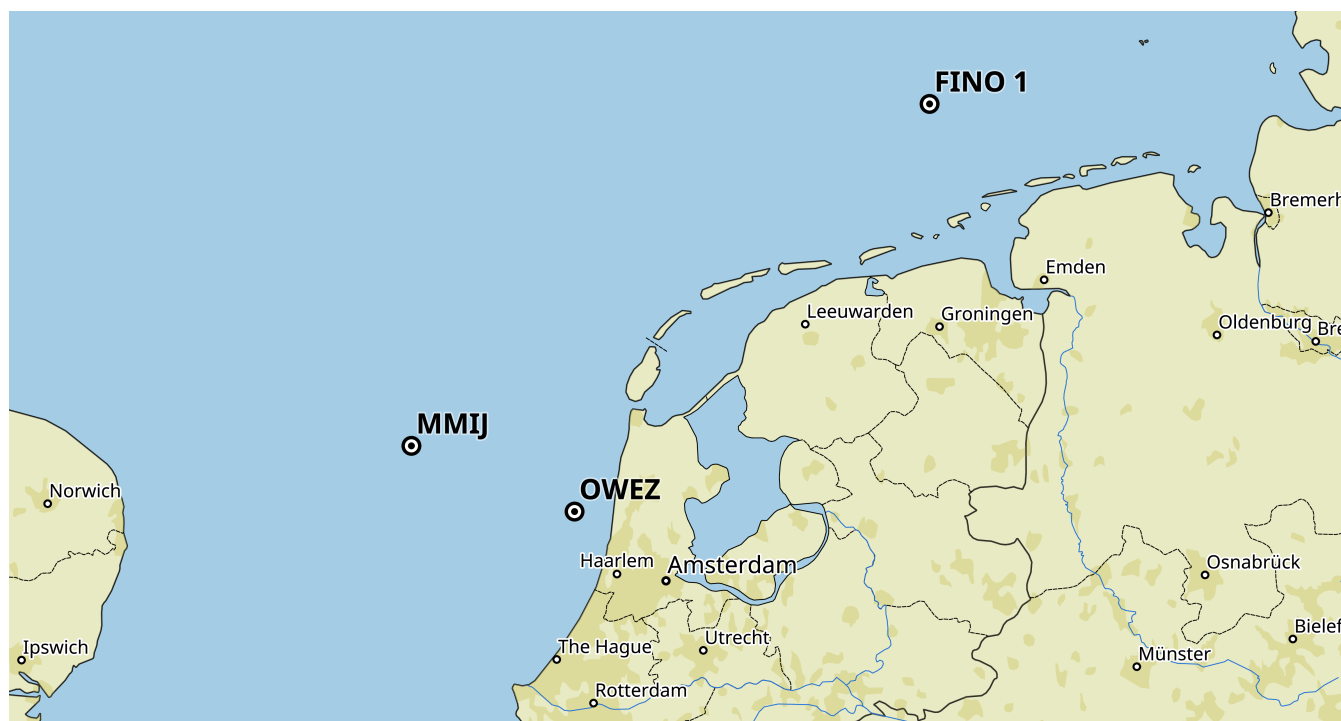

**Figure 1.** A map with the location of the three **off-shore** met masts from which data was analyzed: OWEZ, MMIJ, and **FINO 1**.

We do this in full detail here for the first dataset, but for the other two relegate aspects that are not substantively different to Appendix A1.

Common to all three datasets is that they can be downloaded from a website, where some documentation is available. But, also for all three, we needed to look up external sources and contact parties involved in the dataset creation process to get a more complete view.

### 2.1.1 OWEZ — Off-shore Windfarm Egmond aan Zee

To gather data before and after construction of the Off-shore Windfarm Egmond aan Zee (OWEZ; *Offshore windpark Egmond aan Zee* in Dutch), a met-mast was built on-site. Its location is 52°36'22.9" North, 4°23'22.7" East (WGS 84), which is 15 km off the Dutch coast near the town Egmond aan Zee. The location is indicated in Fig. 1. The mast was erected in 2003 and construction of the wind farm started in 2006. Data is publicly available for the period July 2005–December 2010. The instruments used and quantities measured, and some of their characteristics are listed in Table 1.

Due to an agreement between the Dutch government and the OWEZ developer, data gathered and reports written in the context of the wind farm's construction have been made publicly available. This is done through a website where these materials can be downloaded (NoordzeeWind). The metocean dataset can be downloaded as 66 separate monthly, compressed Excel (xls)





**Table 1.** An overview of the instruments and their locations on the OWEZ met-mast (height in meters above mean sea level and boom orientation), the quantity measured, measurement uncertainty, the measurement ranges, and the sampling frequencies.

| Instrument (#)                                         | Height <sup>ah</sup><br>[m] | Orientation <sup>ao</sup> | Quantity                 | Unit             | Uncertainty <sup>m</sup><br>abs. rel. [%] |     | Range <sup>m</sup> | Freq. <sup>m</sup><br>[Hz] |
|--------------------------------------------------------|-----------------------------|---------------------------|--------------------------|------------------|-------------------------------------------|-----|--------------------|----------------------------|
| accelerometer (1)                                      | 116                         | mast                      | N-S accel.<br>W-E accel. | m/s <sup>2</sup> | 0.01                                      |     | −30–30             | 33                         |
| cup anemometer (9)                                     | all                         | all                       | hor. wind sp.            | m/s              | 0.5                                       |     | 0–50               | 4                          |
| ultrasonic anemometer (3)                              | all                         | NE                        | hor. wind sp.            | m/s              | 0.01                                      | 1.5 | 0–60               | 4                          |
|                                                        |                             |                           | vert. wind sp.           |                  |                                           |     |                    |                            |
|                                                        |                             |                           | wind direction           | °                | 2                                         |     | 0–359              | 4                          |
| wind vane (9)                                          | all                         | all                       | wind direction           | °                | 1.4                                       |     | 0–360              |                            |
| barometer (1)                                          | 20                          | mast                      | atm. pressure            | mbar             | 0.5                                       |     | 600–1100           |                            |
| thermometer (3)                                        | all                         | S                         | ambient temp.            | °C               | 0.1                                       |     | −40–80             |                            |
| hygrometer (3)                                         | all                         | S                         | rel. humidity            | %                | 1                                         |     | 0–100              |                            |
| precipitation sensor (2)                               | 70                          | NE, NW                    | precip. level            | –                |                                           |     | 0–5                |                            |
| thermometer (1)                                        | −3.8                        | mast                      | water temp.              | °C               | 0.15                                      | 0.1 |                    |                            |
| acoustic wave and<br>current profiler <sup>f</sup> (1) | −17                         | ?                         | water temp.              | °C               | 0.1                                       |     | −4–40              | 1                          |
|                                                        |                             |                           | water level              | m                | 0.01                                      |     |                    | 4                          |
|                                                        |                             |                           | wave height              | m                | 0.01                                      | 1   | −15–15             | 4                          |
|                                                        |                             |                           | wave direction           | °                | 2                                         |     | 0–359              | 2                          |
|                                                        |                             |                           | wave period              | s                | 0.01                                      |     | 0.5–50             | 2                          |
|                                                        |                             |                           | current vel. 7 m         | m/s              | 0.005                                     | 1   |                    | 1                          |
|                                                        |                             |                           | current vel. 11 m        |                  |                                           |     |                    |                            |
|                                                        |                             |                           | current dir. 7 m         | °                |                                           |     | 0–359              | 1                          |
|                                                        |                             |                           | current dir. 11 m        |                  |                                           |     |                    |                            |

<sup>ah</sup> For height, ‘all’ corresponds to 21 m, 70 m, 116 m.  
<sup>m</sup> Missing values are unknown.

<sup>ao</sup> For orientation, ‘all’ corresponds to NE, NW, S.

<sup>f</sup> The given sampling frequencies are upper bounds.



spreadsheet files. The total size is almost 1 GB, or about 400 MB compressed. This represents data points for 289 296 10-minute intervals. The data in each file is structured as follows:

- 6 date-time columns (year, month, day, hour, minutes, seconds);
- 48 ‘channels’ of five columns each: an integer identifier ‘Channel’ and four real-valued statistics, ‘Max’, ‘Min’, ‘Mean’, and ‘StdDev’; each channel corresponding to a specific measured quantity and location on the mast.

In the Excel files, the statistics’ values are encoded as 8-byte binary floating point numbers.

Information about the dataset, the met-mast, and its context is available through the same website. In particular, there is a user manual (Kouwenhoven, 2007) and several reports from which further information can be gleaned (e.g., Curvers, 2007; Eecen and Branlard, 2008; Wagenaar and Eecen, 2010a, b). Information about the instruments used and in particular the measurement uncertainty had to be looked up in **spec** sheets or obtained through personal communication with people involved in the project (cf. Acknowledgements).

### 2.1.2 MMIJ — Measuring Mast IJmuiden

The second dataset, ‘MMIJ’, comes from a **met-mast** in the Dutch part of the North Sea. The location is indicated in Fig. 1. Details can be found in Appendix A1.1.

The exact set of signals differs of course from the OWEZ dataset; we have given an overview in Table A1 in the appendix. The data was collected during the period 2011–2016, a period of time comparable in length to OWEZ. The dataset is made available as a single semicolon-separated values (csv) file and the statistics’ values are encoded in a decimal fixed-point format with five fractional digits ( $x...x.xxxxx$ ).

### 2.1.3 FINO 1 — Research Platform in the North Sea and the Baltic Sea Nr. 1

The third dataset, ‘**FINO 1**’, comes from a **met-mast** in the German part of the North Sea. The location is indicated in Fig. 1. Details can be found in Appendix A1.2.

The exact set of signals again differs from the OWEZ dataset; we have given an overview in Table A2 in the appendix. The data investigated was collected during the period **2004–2016**, so a period of time more than twice as long as for the other two datasets. A difference with the other two datasets is that not all statistics are available for all signals. Also, it is free for academic research purposes, but not for commercial use, in contrast to the two other datasets. The dataset is made available as a set of tab-separated values (dat) files and the statistics’ values are encoded in a decimal fixed-point format with up to two fractional digits ( $x...x.xx$ ). For each quantity, a quality column is included next to the statistics’ columns.

## 2.2 Dataset Issues

We split the issues encountered in the datasets into five categories each discussed in their own section: faulty data (Sect. 2.2.1), documentation (Sect. 2.2.2), statistic selection (Sect. 2.2.3), quality flags (Sect. 2.2.4), and value encoding (Sect. 2.2.5).

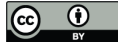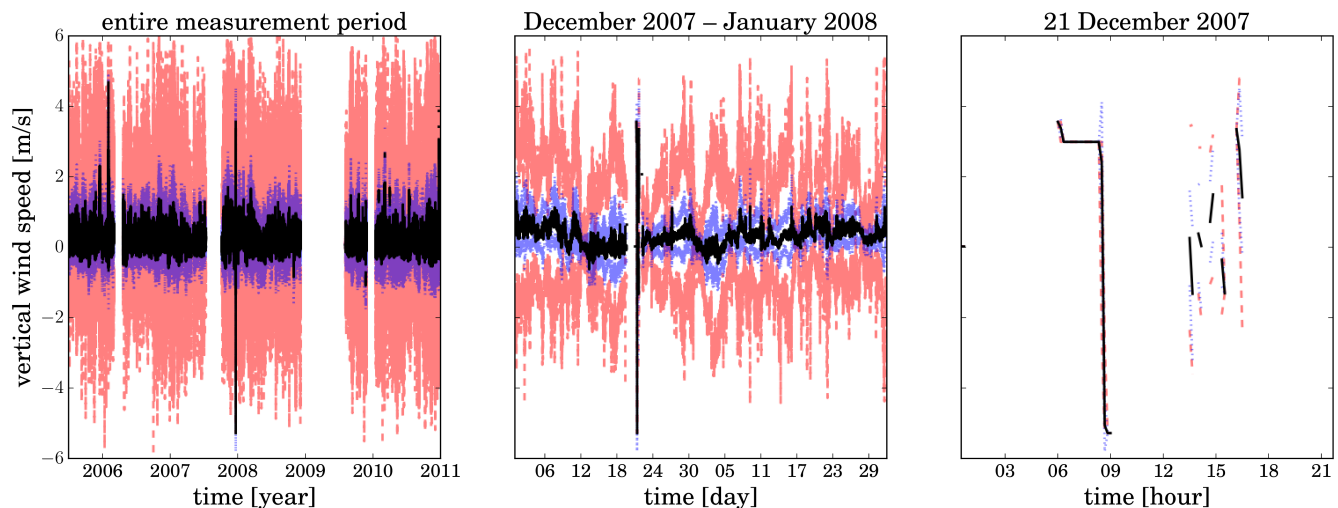

**Figure 2.** An illustration of the visual inspection and zooming of plots. We present the OWEZ vertical wind speed data collected by the ultrasonic anemometer at the NE-116 m location.

### 2.2.1 Faulty Data

Each of the three datasets presented above contained faulty data. With this we mean data values that cannot correspond to the actual values, or are very unlikely to correspond to them. We stumbled upon initial examples, but then systematically looked for issues.

- 5 To facilitate this systematic and partly automated investigation, we created binary file format (HDF5 or netCDF4) versions of the datasets in which metadata such as range and possible values can be stored alongside the data itself. We discuss these formats in more detail in Sect. 3. The automation essentially consisted of looping over all signals and statistics to detect issues; further investigation was done manually.

Concretely:

- 10 1. We performed interactive visual inspection of plots of the individual datasets, including zooming in on suspicious-looking parts. Figure 2 provides an example. The plots should be read as follows: the mean value is given by the ‘inner’ full (black) line; mean values plus and minus one standard deviation are given by the ‘intermediate’ dotted (blue) lines; minima and maxima are given by the ‘outer’ dashed (red) lines.

The plots in this figure are snapshots of an interactive visualization procedure: Even though the lines overlap in the  
 15 unzoomed left-hand plot, an anomalous extreme mean value is visible around the 2007–2008 year change. Zooming in a bit gives the middle plot, where the statistics start becoming visually separated and where the anomaly stands out even more. Zooming in further gives the right-hand plot, which shows that many missing values surround the anomaly, further suggesting that the values still present here may not be reliable. (We do not know *why* the surrounding values are missing.)

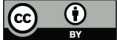

**Table 2.** An overview of the (largest) range violations present in the FINO 1 dataset. (Values rounded to three digits.)

| Instrument            | Quantity          | Unit             | Statistic | Lowest  | Instr. range | Highest |
|-----------------------|-------------------|------------------|-----------|---------|--------------|---------|
| cup anemometer        | hor. wind. sp.    | m/s              | min       | 0.0313  | 0.1–75       |         |
|                       |                   |                  | max       |         | 0.1–75       | 1690    |
| ultrasonic anemometer | hor. wind. sp.    | m/s              | max       |         | 0–45         | 45.6    |
|                       | wind direction    | °                | avg       |         | 0–359        | 360     |
| wind vane             | wind direction    | °                | max       |         | 0–360        | 521     |
|                       |                   |                  | avg       |         | 0–360        | 366     |
| barometer             | atm. pressure     | hPa              | avg       | 0.00391 | 800–1060     |         |
| hygrometer            | rel. humidity     | %                | avg       | 0.0313  | 10–100       | 102     |
| precipitation sensor  | precip. intensity | mA               | avg       | 0.00195 | 4–20         | 45.3    |
| pyranometer           | global radiation  | W/m <sup>2</sup> | avg       | −4.86   | 0–4000       | 145 000 |

2. We ran automated checks for values **outside the normal range** for the series or for inconsistent sets of statistics' values. Let us clarify what inconsistent sets of statistics' values are. Statistic values imply bounds on the value of other statistics. If such a constraint is violated for some 10-minute interval, the tuple of statistics (minimum  $\tilde{x}$ , maximum  $\hat{x}$ , mean  $\bar{x}$ , standard deviation  $s_x$ ) for that interval is inconsistent. For example, it should be the case that  $\tilde{x} \leq \bar{x} \leq \hat{x}$ ; violations of this constraint are present, e.g., in the **FINO 1** cup anemometer wind speed data. Less obvious constraints involving the sample standard deviation also exist. We used  $\frac{1}{2}|\hat{x} - \tilde{x}|$  as the general upper bound for the standard deviation, given that the values lie in the interval  $[\tilde{x}, \hat{x}]$  (Shiffler and Harsha, 1980). (Here  $\tilde{x}$  and  $\hat{x}$  can be replaced by range bounds in case the minimum and maximum statistics are not present in the dataset.) Any such inconsistency is a serious issue, as it indicates a deficiency somewhere in the procedures for calculating statistics and their post-processing.

As an example, the range violations in the FINO 1 dataset gave the results listed in Table 2. Some range violations point to faulty data (e.g., cup anemometer-hor. wind speed-max, where the value exceeds the bound by more than an order of magnitude), others suggest a need for more elaborate uncertainty analysis (e.g., hygrometer-rel. humidity-avg, where the violating values probably correspond to the bounds) or **more intelligent handling** of the range bounds (e.g., wind vane-wind direction-max, where the upper *bound* could be increased; cf. also Appendix A2.1).

The code producing the results of Table 2 is publicly available (Quaeghebeur, 2019). The fact that our netCDF4 version of the dataset is (uniformly) structured and contains metadata allows the code to be generic, i.e., not variable-specific, and therefore compact.



3. We did checks of the occurring values, for quantities with a discrete number of possible values. One example are the synoptic code **'Max' values from the MMIJ precipitation monitor**. The check showed the following values to be present:

−998 −997 −953 −952 −950 −900 −176 −16  
 0 51 53 55 58 59 61 63 65 68 69 71 73 75 77 87 88 89 90  
 108

Synoptic code values below 0 and above 99 do not exist (World Meteorological Organization, 2016, p. 356–358), so faulty data is present here. Only integer values are present here, but erroneous fractional values would also be detected.

The code for performing this check is publicly available (Quaeghebeur, 2019).

4. We ran automated checks for outlier candidates. There can be both 'classical' outliers, i.e., values outside the range typical for that series, and 'dynamic' ones, i.e., subsequent value pairs whose difference ('rate-of-change') lies outside the difference typical for that series's time-variation. Both types of outliers can, but do not necessarily correspond to faulty data.

In further manual analysis of outlier candidates, causes may be identified, providing feedback on the data collection and processing procedures. For example, both in the MMIJ and FINO 1 datasets, we encountered sudden drops to the value zero for some series **at regular time instances**; this quite likely corresponds to foreseeable or detectable sensor resets of some kind.

There are many methods for outlier detection (Aggarwal, 2017). But, in this paper, we just wish to point out that there is a clear need for some form of outlier detection to be used in the creation of metocean 10-minute statistics datasets. Namely, the datasets we analyzed would benefit enormously from even a basic analysis; we suspect this generalizes to other such datasets produced in the wind energy field. To make this need apparent, we present a set of plots in Figs. 3–6 that illustrate that indeed there are still outliers present in the datasets. We devised this type of plot as an alternative to lag-1 plots (which plot  $x_{k+1}$  versus  $x_k$ ), so that rate-of-change magnitudes can be read off directly.

These plots should be read as follows: The horizontal ' $x$ '-axis shows measurement value; the vertical ' $y$ '-axis shows the absolute value of the mean of the differences with the preceding and next measurement values. Each dot corresponds to a measurement. Lines connect successive measurements. Only those measurements are shown with an  $x$ -percentile outside  $[0.1, 99.9]$  or a  $y$ -percentile above 99, so the brunt of the measurements are not shown. (These bounds are somewhat arbitrary, but reasonable for the size of the datasets.) The  $y$ -axis is linear until the 99th percentile, and logarithmic above. To give an idea about the distribution of all the measurement points, so also the ones that are not shown, we add (blue) lines for specific fractiles: thick dashed for the median and thin dotted for  $\{\frac{1}{26}, \dots, \frac{1}{8}, \frac{1}{4}, \frac{3}{4}, \frac{7}{8}, \dots, 1 - \frac{1}{26}\}$ . Thick full (red) lines are added as necessary to indicate range bounds.

In Fig. 3, there are some suspiciously high values, some even beyond the nominal measurement range of the instrument. This is also the case for the 'Min' and 'Mean' statistics, even if the probably isolated responsible data points are not

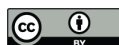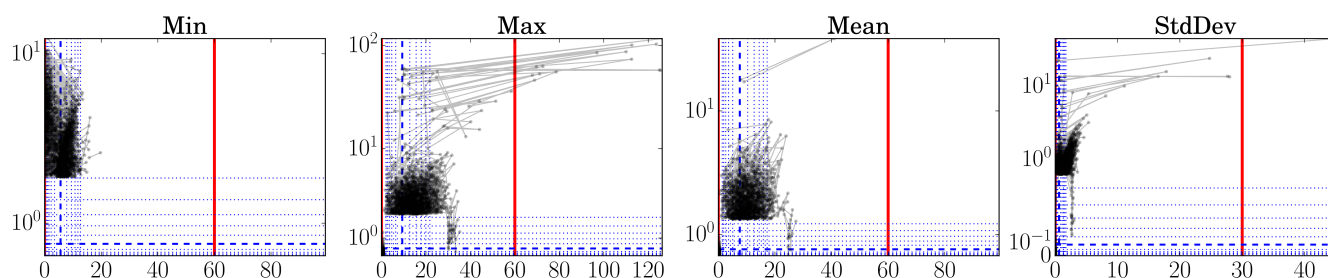

**Figure 3.** Illustrative plots for visually identifying outliers: OWEZ 21 m NW ultrasonic anemometer horizontal wind speed data [m/s].

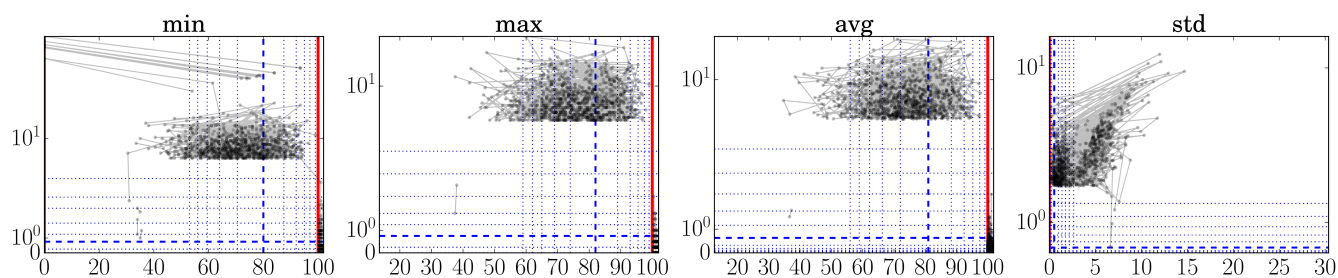

**Figure 4.** Illustrative plots for visually identifying outliers: MMIJ 21 m relative humidity data [%].

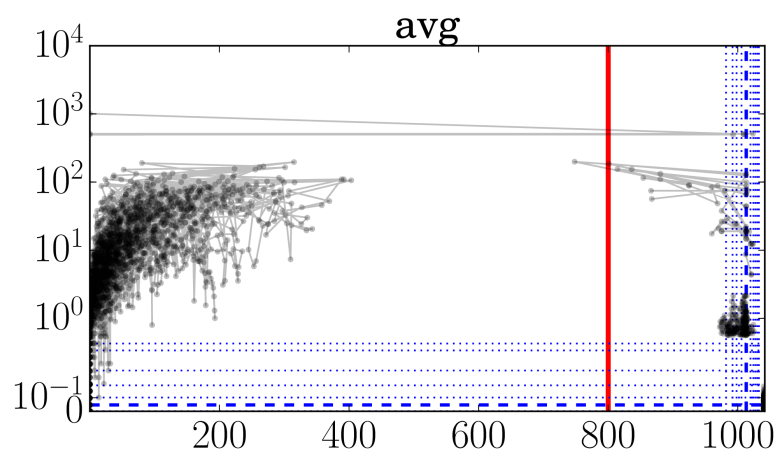

**Figure 5.** Illustrative plots for visually identifying outliers: **FINO 1** 21 m air pressure data [hPa].

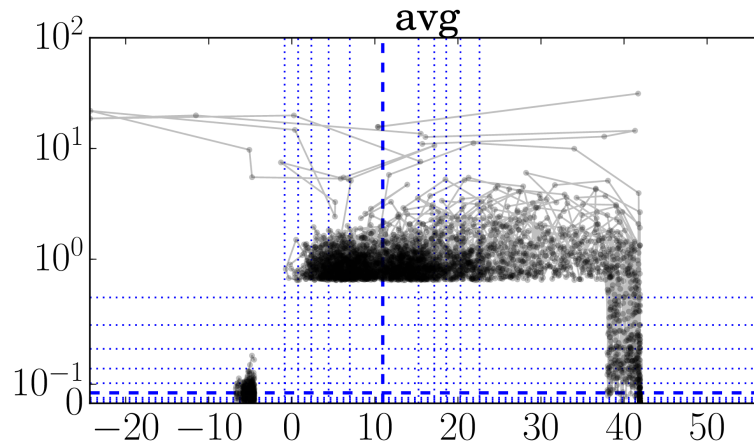

**Figure 6.** Illustrative plots for visually identifying outliers: FINO 1 72 m ambient temperature data [°C].

visible. In Fig. 4, there are suspicious 0 % values and a bunch of values beyond 100 %. In Fig. 5, we see a **bunch** of data points at suspiciously low values and some impossibly fast 10-minute pressure changes, a number of them more than 100 hPa. In Fig. 6, we see a quite large number of atypically high temperatures and some impossibly fast 10-minute temperature changes, a couple of them of more than 30 °C.

- 5 Outlier plots for all data series are available as supplementary material for this paper. The code producing them is publicly available (Quaeghebeur, 2019).

Our analysis was generic in the sense that we did not make use of quantity-specific domain knowledge (e.g., empirical relationships between mean and maximum) or measurement setup-specific knowledge (e.g., met-mast influence on wind speed). In the context of wind resource assessment, Brower (2012) gives a description of a data validation procedure that does take into account such specifics. Meek and Hatfield (1994) proposed signal-specific rules for checking meteorological measurements for range violations, rate-of-change outliers, and no-observed-change occurrences.

For all of the issues presented in this section, the dataset provider is better placed to interpret them, given that they have information about the data acquisition and processing procedures that the user lacks. Therefore it is the dataset provider who would ideally identify such issues and fix them, if possible, or otherwise at least mask or flag them. Given, as illustrated, the relative simplicity of the required analyses, relatively little effort may be required for a substantial increase in dataset quality.

### 2.2.2 Documentation

As mentioned in Sect. 2.1, for each of the three datasets we investigated, documentation on the measurement setup, instruments, and quantities measured is available. Usually, this takes the form of a website, data manual, overview table, or a combination thereof. However, for purposes of interpretation and use of these datasets, some essential or potentially useful information is often missing.



We consider the information we listed in the overview Tables 1, A1, and A2 to be essential: instrument location, quantity measured, its unit, information about accuracy (e.g., by giving absolute and relative uncertainty),<sup>1</sup> range, and, given our focus on statistics data, sampling frequency. For categorical data such as binary yes/no sensors (e.g., precipitation presence) or enumeration values (e.g., synoptic codes), range is of course replaced by a set of possible values and unit by a description of how to interpret those possible values.

How do the three datasets fare in terms of documentation?

**Time stamps** All data values are accompanied by time stamps spaced ten minutes apart. However, for none of the three datasets it is mentioned whether this time-stamp refers to the time of the first, last, or even some other sample. Knowing this is necessary for the precise combination of datasets. If we assume that the samples underlying the dataset start at the full hour, which corresponds to the raw data we have seen for OWEZ, we can deduce the convention used. Based on whether the first time-stamp in a data file has ‘00’ or ‘10’ for its minutes value, we assume that OWEZ and MMIJ are first-sample based and FINO 1 is last-sample based.

**Location** For all three datasets, the documentation about location was good to excellent: technical drawings of the mast with instrument locations or detailed data about orientation and height. A small comment we can make here is that the location information in the series names used sometimes does not directly correspond to the actual situation. For example, in the MMIJ dataset a 46.5° angle offset of boom orientation relative to the North needs to be accounted for and in the FINO 1 dataset some height labels differed from the documented heights.

**Quantities & units** The description of the actual quantities measured and their units was in general also quite good. There were two clear exceptions: (i) The precipitation detector was completely omitted from the MMIJ documentation. (ii) Precipitation data from FINO 1 at 23 m contained the concatenation of both presence (yes/no) and intensity data. Also, the interpretation of binary codes (e.g., does 0 correspond to yes or no?) was for none of the datasets explicitly given, but had to be deduced from the data.

**Ranges** Ranges and sets of possible values were mostly left unmentioned in the documentation, except for those available in instrument data-sheets included in the OWEZ and MMIJ data manuals. Making the data sheets of the instruments available in such a way turned out to be convenient, as tracking them down is in our experience not always possible.

**Accuracy** Accuracy information was available in the FINO 1 overview table and for those instruments for which the data sheet was included in the OWEZ and MMIJ data manuals. For the other signals, we had to rely on the information found in data sheets not available in the datasets’ documentation or website. Entirely absent is a discussion of the impact on accuracy of all other aspects of the measurement setup (e.g., analog-to-digital conversion) and data processing (e.g., the

<sup>1</sup>We follow the Joint Committee for Guides in Metrology (2012) in our usage of ‘(measurement) accuracy’ and ‘(measurement) uncertainty’. Namely, the former refers to a qualitative description of the “closeness of agreement between a measured quantity value and a true quantity value of a measurand” and the latter to a quantitative measure, i.e., a “non-negative parameter characterizing the dispersion of the quantity values being attributed to a measurand, based on the information used”. These terms cover both systematic and random aspects.





application of calibration factors). Such a discussion would allow researchers using the datasets to get a more complete picture of the accuracy of the values in the datasets.

**Sampling frequency** The sampling frequencies were available in the documentation for MMIJ and FINO 1, but not for OWEZ. **This information is essential** for the estimation of the uncertainty of the mean and standard deviation statistics.

**Instruments & their settings** We mentioned our use of data sheets a few times before. To find these when they are not included in the documentation, the exact instrument models need to be available. This was the case for all three datasets. However, this may not be enough: the measurement characteristics of some instruments (e.g., barometers) depends on specific settings, especially when they perform digital processing. These settings were never described.

**10 Data processing** Next to its relevance for assessing the accuracy of the values in the dataset, a good view of the data processing pipeline is important for other aspects as well:

- When is data considered to be faulty and flagged in or omitted from the dataset accordingly? This is entirely missing for OWEZ and **FINO 1**, but some information is given for MMIJ: if some values in a 10-minute interval are missing, the corresponding statistics are marked as missing. How faulty data values are encoded is documented for OWEZ (as the value  $-999999$ ), but not for MMIJ and FINO 1. For MMIJ, the convention used (the string ‘NaN’) seems to be used quite consistently, although some precipitation monitor outlier values might actually be other markers for faulty data. For FINO 1, there are two main faulty data placeholder values easily identified from the datasets:  $-999.99$  and  $-999$ . However, other values are also present, such as 0 and variants of the two main ones, such as 999,  $-999.9$  and  $-1000$ .
- How are the statistics calculated? This is never mentioned in the documentation. For most signals not much ambiguity can arise, as there is not much choice, being limited to a possible bias correction approach for the standard deviation. However, for directional data, it is very much pertinent which definition of mean and standard deviation have been used: arithmetic or directional mean, classical or circular standard deviation (see, e.g., Fisher, 1995).
- Do the data processing steps to arrive at the statistics have any weaknesses, numerical or other? For example, in the FINO 1 wind speed data, there appear max values that, suspiciously, are a factor ten or hundred times larger than the surrounding values. Leaving such things unexplained severely reduces the trust in the dataset.

It is clear from the above list that while already **quite a lot** of information is available, quite a number of very useful pieces of information are missing. Many of these are available to the dataset providers, so again the quality of the datasets, now in terms of documentation, can be substantially improved with **relatively little effort**.

Unmentioned as of yet is that essentially all the documentation for these datasets is provided in a way accessible to humans, but not in a machine-readable way. Much of the information described in the documentation can however be encoded as *metadata* in a standardized and machine-readable way. Metadata is discussed further in Sect. 3.1.

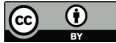

### 2.2.3 Statistic Selection

As seen in the overview sections 2.1.1, 2.1.2, and 2.1.3, for all three datasets the statistics provided are essentially the same: minimum, maximum, mean, and standard deviation. Only for FINO 1 not all statistics are included for all quantities. In this section, we are going to discuss these statistic selection choices, pointing out issues that arise from them.

- 5 The uniformity of the statistics provided is convenient when reading out the data, as it reduces the user's quantity-specific code. However, when the signal's values do not represent an (underlying) linear scale providing the minimum, maximum, mean, and standard deviation does not make much sense; it may actually cause misinterpretation. This is usually the case for categorical signals, such as the MMIJ synoptic code signal. In such cases, other statistics must be chosen. For example, for binary quantities such as yes/no precipitation data, giving the relative frequency of just one of the two values captures all the  
10 information present in the typical set of four statistics.

- As said, in the FINO 1 dataset statistics are sometimes omitted, but mostly for other reasons. For quantities that are considered to be 'slow-varying' (such as atmospheric pressure, ambient temperature, and relative humidity) only the mean has been recorded.<sup>2</sup> However, next to the convenience of uniform sets of statistics, having multiple statistics for a measurement interval is useful for data quality assessment. (Possible storage and transfer constraints are of course valid reasons for limiting  
15 the number of statistics.) For directional quantities such as wind direction the minimum and maximum were omitted because these are considered meaningless by the dataset producer.<sup>2</sup> The OWEZ and MMIJ datasets show, however, that it is possible to give meaningful definitions of maximum and minimum for directional data. (See Appendix A2.1 for a concrete approach.) This can be valuable information, as it makes it possible to deduce, e.g., the sector extent from which the wind has blown during a time interval.

### 20 2.2.4 Quality flags

Next to statistics, we saw in Sect. 2.1.3 that the FINO 1 dataset also contains a categorical quality flag for each set of statistics. Such information is not present in the other two datasets.

- Including such a flag makes it possible to also provide information about missingness, i.e., to indicate why one or more statistic values is missing at that time instant. Such information is often encoded using a bit field, i.e., a binary mapping from  
25 quality issues and missingness mechanisms to true (1) and false (0); this bit field can be recorded as a positive integer. For example, consider the following tuple of quality issues and missingness mechanisms: ('suspect value jumps', 'out-of-range values', 'unknown missingness mechanism', 'icing', 'instrument off-line'). Then the bit string '00000' (or integer 0) would denote a measurement interval without any (identified) issues and for example '010010' (or integer 18) would correspond to a measurement interval with both instrument icing and out-of-range values detected.

<sup>2</sup>Personal communication d.d. 2017-06-27 with Richard Fruehmann (cf. Acknowledgements).

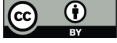

## 2.2.5 Value Encoding

In the overview sections 2.1.1, 2.1.2, and 2.1.3, for all three datasets, the values themselves are encoded as fixed-point values for MMIJ and FINO 1 and as a binary floating point double for OWEZ. There is, however, more to be said about what exactly is encoded and which information can be reflected in the encoding. We do that here.

- 5 Signal values have a natural set they belong to. Relative humidity, for example, is a fraction, i.e., a value between zero and one. Categorical signals take values in a predefined enumerated set. If for such signals values are given outside of this set, this is a source of confusion: the user may wonder whether they can just round erroneous values to the nearest enumerated one or treat them as faulty. For example, the MMIJ precipitation detector's precipitation presence signal contains values *around* the enumerated ones and its precipitation monitors' precipitation presence signals contains values far outside the range of  
 10 enumerated values. Another case are continuous signals that are at one point expressed as current or voltage values: the end user will be less certain about the correct translation procedure to the correct units than the data processor. For example, the FINO 1 precipitation intensity signal is expressed as a current instead of an accumulation speed.

- In the OWEZ and FINO 1 datasets it sometimes occurs that certain statistics are marked as faulty or missing, while nevertheless other statistics for the same signal at the same instance are available. From inspection of such data, it is clear that it can  
 15 both happen that the values of these other statistics seem reasonable or faulty. An explanation of why the data values are partly missing would preserve trust in the non-missing values. This requires a description of the processes creating such a situation (cf. Sect. 2.2.2), but could also include instance-specific information in a flag value (cf. Sect. 2.2.4).

- The values stored in the dataset do not in general encode their accuracy. For the MMIJ and FINO 1 datasets, values used a fixed-point format, but the number of decimal digits used is not directly related to the accuracy information available for the  
 20 different quantities. This fact may be overlooked by users, resulting in possible misinterpretations.

- To avoid misinterpretation, it is possible to add an estimate for a value's uncertainty, e.g., by rounding and specifying a corresponding number of significant digits. Accuracy information was only available for signal values (i.e., high frequency samples), typically as absolute uncertainties  $\varepsilon_a$  and relative uncertainties  $\varepsilon_r$ . Below, we give expressions for propagating this information to the statistics, as this does not seem available in the literature, and discuss further factors affecting the statistics' uncertainty. The nontrivial derivations of these expressions and a description of the underlying model for the measurement process can be found in Appendix A2.2. The most important assumption made in these derivations is that  $\varepsilon_r^2 \ll 1 \ll n$ , where  $n$  is the number of samples per averaging interval.

- Sample uncertainties can be propagated to the statistics of the  $n$  signal values  $x_k$  per averaging interval, which is 10 minutes for the datasets discussed in this paper. For this, we essentially assume independence and normality of the corresponding  
 30 uncertainties  $\varepsilon_{x_k}$ . Also the uncertainty in the statistics due to the finite nature of the samples can be quantified based on the fact that the sum appearing in the calculation of the mean and standard deviation can be seen as a simple form of quadrature. Let  $\tilde{x}$  and  $\hat{x}$  be the minimum and maximum values in the sample; let  $\bar{x} = \frac{1}{n} \sum_{k=1}^n x_k$  and  $s_x^2 = \frac{1}{n} \sum_{k=1}^n (x_k - \bar{x})^2$  be the sample mean and sample variance. We find the following expressions for the squared uncertainties of the statistics:

$$\varepsilon_x^2 \approx (\varepsilon_a^2 + \varepsilon_r^2 x^2) + \frac{1}{n^2} \delta^2 \quad \text{for } x \in \{\tilde{x}, \hat{x}\}, \quad \varepsilon_{\bar{x}}^2 \approx \frac{1}{n} (\varepsilon_a^2 + \varepsilon_r^2 (\bar{x}^2 + s_x^2)) + \frac{1}{n^2} \delta^2, \quad \varepsilon_{s_x}^2 \geq \frac{1}{n} (\varepsilon_a^2 + \varepsilon_r^2 (\bar{x}^2 + 3s_x^2)) + \frac{1}{n^2} \delta^2.$$



Here  $\delta \approx \frac{\hat{x} - \tilde{x}}{2}$ ; in case  $\hat{x}$  and  $\tilde{x}$  are unavailable,  $\delta \approx z_{1-1/n} s_x$  can be used instead, where  $z_{1-1/n}$  is the standard normal quantile for exceedance probability  $1/n$ . The uncertainty due to the finite sample size, the term  $\frac{1}{n^2} \delta^2$ , diminishes much faster as a function of  $n$  than the uncertainty due to the measurement noise, expressed by the other terms. In practice, this second term is therefore negligible unless  $\varepsilon_a$  and  $\varepsilon_r$  are taken to be zero because no information is available about them.

- 5 Next to having associated uncertainties, the sample statistics can also be biased estimators of the statistics for the underlying signal. It turns out that only the sample standard deviation  $s_x$  is biased and that

$$s'_x = \sqrt{\max\{s_x^2 - (\varepsilon_a^2 + \varepsilon_r^2 \bar{x}^2), 0\}} \quad (1)$$

would be a better estimate from this perspective.

- To get a more concrete view of these uncertainties and bias, we provide average relative uncertainty and bias values for the  
 10 MMIJ dataset in Table 3. The variation of the uncertainties and bias is substantial, so this table of averages does not provide a complete picture, but enough to draw some conclusions:

- A fixed-point format does not have the flexibility to give the appropriate number of significant digits; usually either too many or too few are given.
- While the uncertainty is usually rather small (up to a few percent), in some cases it is substantial (around ten percent or  
 15 more).
- The bias in the sample standard deviation can in general not be ignored.

What the impact of uncertainty and bias are depends on the application. (For example, **turbulence intensity estimation is clearly affected by the bias in the wind speed sample standard deviation.**) But to be able to assess this impact, uncertainty and bias values must be available, making expressions such as the above essential.

### 20 3 Dataset Formatting

We split our discussion of dataset file formats into two parts. First, in Sect. 3.1, we give an overview of the formats that are currently used for the dissemination of the datasets studied and existing alternatives that we argue to be superior. Then, in Sect. 3.2, we take a closer look at the potential of these alternatives based on our practical experience with them.

#### 3.1 A Comparison of Dataset File Formats

- 25 We saw in Sect. 2.1, during our first look at the datasets we studied, that these were disseminated as a compressed set of Excel files for OWEZ, a compressed semicolon-separated values file for MMIJ, and a compressed set of tab-separated values files for FINO 1. In the Excel files, the values are stored as 8-byte binary floating point numbers. In the delimiter-separated values files the values are specified in a fixed-point decimal text format, with five (MMIJ) and two (FINO 1) fractional digits. All of these are essentially table-based formats, where columns correspond to series and rows correspond to values for a specific



**Table 3.** Average relative uncertainties and bias in percent for quantities from the MMIJ dataset for which some (likely incomplete) uncertainty information is available. (See Table A1 for more information about the quantities. The values are given with two digits, but it is not implied that both are significant.)

| Instrument                                  | Quantity          | $\frac{\varepsilon_{\bar{x}}}{\bar{x}}$ | $\frac{\varepsilon_{\hat{x}}}{\hat{x}}$ | $\frac{\varepsilon_{\bar{x}}}{\bar{x}}$ | $\frac{\varepsilon_{s_x}}{s_x}$ | $1 - \frac{s'_x}{s_x}$ |
|---------------------------------------------|-------------------|-----------------------------------------|-----------------------------------------|-----------------------------------------|---------------------------------|------------------------|
| cup anemometer                              | hor. wind sp.     | 4.3                                     | 2.7                                     | 0.067                                   | 1.0                             | 12                     |
| ultrasonic anemometer                       | wind sp. X dir.   | 10                                      | 11                                      | 2.4                                     | 3.0                             | 8.0                    |
|                                             | wind sp. Y dir.   | 11                                      | 12                                      | 2.4                                     | 3.0                             | 7.5                    |
|                                             | wind sp. Z dir.   | 16                                      | 29                                      | 7.7                                     | 3.3                             | 8.2                    |
| wind vane                                   | wind direction    | 2.2                                     | 0.77                                    | 0.056                                   | 1.4                             | 5.4                    |
| barometer                                   | atm. pressure     | 0.017                                   | 0.0099                                  | 0.00021                                 | 7.2                             | 37                     |
| thermometer                                 | ambient temp.     | 2.3                                     | 2.3                                     | 0.067                                   | 35                              | 34                     |
| hygrometer                                  | rel. humidity     | 1.3                                     | 1.3                                     | 0.026                                   | 8.7                             | 34                     |
| precipitation monitor                       | precip. intensity | 17                                      | 17                                      | 0.45                                    | 3.4                             | 1.1                    |
| from <sup>v,s</sup> cup anemometer          | hor. wind sp.     | 2.7                                     | 1.7                                     | 0.044                                   | 0.76                            | 7.9                    |
| from <sup>v</sup> ultrasonic anemometer     | wind sp. magn.    | 3.9                                     | 3.0                                     | 3.0                                     | 3.4                             | 2.2                    |
|                                             | hor. wind sp.     | 2.0                                     | 0.79                                    | 0.042                                   | 0.44                            | 2.1                    |
| from <sup>v,s</sup> ultrasonic anemometer   | hor. wind sp.     | 1.2                                     | 0.58                                    | 0.045                                   | 0.31                            | 1.2                    |
| from <sup>v,s</sup> wind vane               | wind direction    | 1.8                                     | 0.56                                    | 0.042                                   | 0.51                            | 3.6                    |
| from <sup>v</sup> barometer and thermometer | air density       | 0.016                                   | 0.0085                                  | 0.00018                                 | 2.0                             | 16                     |

<sup>s</sup> Correction for tower shadow by selective averaging of values at the same height.

<sup>v</sup> Virtual measurement; namely, derived from signals obtained with one or more actual instruments.

time instance. (This structure satisfies the requirements of ‘tidy data’ according to Wickham (2014), apart from being split over multiple files.) Some metadata is included in two or more header lines, such as series identifiers and the unit.

We created binary file format versions of the datasets; in HDF5 format (The HDF Group, 2017a) for OWEZ and in netCDF4 format (Unidata, 2016) for MMIJ and FINO 1. Both formats are platform-independent. Files in netCDF4 format are actually  
 5 HDF5 files, but adhering to the netCDF data model (Rew et al., 2006). The use of a different data model is reflected in the application programming interfaces (APIs) available for HDF5 and netCDF4. A number of HDF5’s technical features are not supported by the netCDF data model, which on the other hand provides additional semantic features, most notably, shared dimensions and coordinates variables. The netCDF4 format and its predecessors are popular for the storage of Earth science  
 10 datasets, including metocean ones. These formats allow the data to be placed into multidimensional arrays, ‘variables’, in a hierarchical file system-like group structure. Arbitrary key-value metadata attributes can be attached to both groups and variables. The variables support various common data types, such as 1, 2, 4, and 8-byte integers, 2, 4, and 8-byte binary IEEE floating point numbers (Cowlshaw, 2008), and character strings. Also custom enumerations, variable-length arrays, and



compound types can be defined, e.g., a combination of four floats and an integer. Furthermore, variables can be compressed transparently, i.e., without the user having to manually perform decompression before use.

Let us give a brief evaluation of support in software tools for the different file formats. Even if the delimiter-separated values files are not really standardized (however, see Lindner, 1993; Shafranovich, 2005), support for them is near universal. Software tools usually include options to deal with the particulars of the actual encoding (delimiter, quoting, headers, etc.), but this does require manual discovery of these specifics. These text-based formats can in principle be read and modified in a text-editor, but these are usually not designed to deal with large files, so this is actually impractical for all but the smallest datasets and **useless** for analysis. The Excel ‘xls’ format, even though proprietary, has broad reading support. Support for HDF5 and netCDF4 formats in software tools is very extensive (The HDF Group, 2017b; Unidata, 2018). This, next to their feature-set, is also a reason for us choosing to use them; they appear to be the most future-proof of the many binary formats in existence. We used Python modules to work with all these formats (McKinney et al., 2016; Colette, 2017; Unidata, 2015).

Next let us consider the impact of a format being text-based or binary-based. Text-based formats in principle give a lot of freedom in choosing the format in which values are represented, but usually this is done in a single fixed-point format. To use the data, the values’ representations need to be parsed into the standard binary number formats used by computers, namely, floats and integers of various kinds. Binary file formats use binary number formats directly, which are faster to load into memory and more space-efficient.<sup>3</sup> Because of their standardized nature, they can include other binary-specific features, such as transparent compression and checksums (data integrity codes).

Now let us look at the metadata. HDF5 and netCDF4 are considered **self-describing formats**, as they allow arbitrary metadata to be included next to the data. This data is easy to access, also programmatically. Table-based data files typically include one or two header lines of metadata (sometimes more), but there is no universal convention about what can be found there. So making use of information included in this way always requires user intervention. There are initiatives to create metadata inclusion standards for delimiter-separated values formats, but these have not gained significant adoption and are aimed at either web-based material (Tennison et al., 2015) or small datasets (Riede et al., 2010), or are very recent proposals (Walsh and Pollock, 2019).

Section 2.2.2 mentioned that the documentation available for the datasets we investigated is not machine-readable. It can be made so by providing it as metadata. Such metadata can be used to facilitate analyses and uses of the data. For example, if a tool **‘knows’** the range and units associated to series of values, air pressure and temperature, say, then it can automatically determine those for derived series, such as air density. Examples of metadata standards for datasets are the ‘CF Conventions’ (Eaton et al., 2017) and ISO 19115-1 (ISO/TC 211, 2014). It is encouraged in the Earth Science community to not just add arbitrary metadata, but include at least standard attributes from the ‘CF Conventions’ (Eaton et al., 2017) and follow the ‘Attribute Convention for Data Discovery’ (ESI, 2015). These facilitate reuse, discovery, and also make it possible, for example, for software to enhance

<sup>3</sup>In text files, every decimal digit costs 8 bits (1 byte) to store, so a length- $n$  number requires  $8n$  bits. In binary formats, a more efficient encoding is used (numbers as bit-strings), requiring  $m$  bits. To round-trip from decimal to binary and back,  $m = \lceil n \log_2(10) + 2 \rceil \approx \lceil 3.3n + 2 \rceil$  is sufficient (Matula, 1968). This picture does not change substantially if sign and magnitude are taken into account. In practice a 32-bit binary format is used for storing values, which uses 23 bits for representing the significand, sufficient for 6 decimal significant digits; 1 bit is used for the sign and 8 for the exponent.



the presentation of the dataset elements (see, e.g., Hoyer et al., 2017). They also allow for adding further useful metadata, such as provenance information, e.g., in the form of an ISO Lineage (ISO/TC 211, 2019). These conventions are aimed at netCDF files, but can to a large degree be applied to HDF5 files as well. Of course the metadata to be included as recommended by these conventions can also be specified for table-based formats, but not in the same self-describing way.

## 5 3.2 Practical Experiences with Binary Formats

We already mentioned in Sect. 2.2.1 that we created binary file format (HDF5 or netCDF4) versions of the datasets we studied. In this section, we first, in Sect. 3.2.1, report on the process and its results. Then, in Sect. 3.2.2, we discuss the limitations of these formats, including limitations of software support.

### 3.2.1 The Transformation Process

10 Transforming the supplied data files was done by writing a specific script for each case. The general setup is similar for each script:

1. One needs to import the supplied datasets into in-memory data structures that can be manipulated by the scripting language. An important part of this step is the identification of missing data or data marked as faulty and encoding it appropriately. Storing them as the ‘Not a Number’ binary floating point value is the common approach we followed.
- 15 Using a Boolean mask separate from the dataset itself is an alternative that can also be used in case the data stored does not consist of floating point values.
2. One must decide on and create a structure for the file, to organize the data and make it conveniently accessible. We used a hierarchical structure for this, grouping first by device (class) and then by quantity. For instrument locations, we tried two approaches:
- 20 – adding the locations as groups in the hierarchy, below the ‘quantity’ groups (done for OWEZ);
- collecting the data for all locations in a multidimensional array with additional axes next to the time axis, e.g., for height and boom direction (done for MMIJ and FINO 1).

For the different statistics (minimum, maximum, mean, and standard deviation), we tried three approaches:

- adding the statistics series as separate variables in the hierarchy (done for all three);
- 25 – keeping the statistics together in a *compound data structure*, essentially a tuple of values, where each value is accessed by (statistic) name; such compound values then formed the elements of the multidimensional arrays (done for MMIJ and FINO 1);
- adding the statistics as an extra axis to the multidimensional array (done as well for MMIJ).
3. One must collect and compose the metadata for the dataset, the devices, and the quantities. Then one must add these as
- 30 attributes in the file. The latter is almost trivial to do once the former, time consuming task is completed.





4. One must choose an encoding and the storage parameters for the data and write it out to the file. We chose to store the values as 4-byte binary floating point numbers, compress it using the standard ‘Deflate’ algorithm, and add error detection using ‘Fletcher-32’ checksums. Furthermore, we used the information available about the accuracy of the values to round to the least significant *binary* digit. This is a lossy transformation that, however, does not lose significant information, but further improves compression.

Let us finish this section with some remarks.

- During the transformation process, we could load the datasets studied entirely into memory. This is convenient, but not necessary, as the process of reading the supplied datasets can be done in a piece-wise fashion.
- The size of the files resulting from the transformation we made was one-eighth of the supplied files’ size or smaller and one-half their compressed size or smaller. (More precisely, the sizes of the uncompressed [compressed] supplied files versus the sizes of our HDF5 or netCDF4 versions are as follows. OWEZ: 1 GB [400 MB] vs. 65 MB; MMIJ: 500 MB [120 MB] vs. 55 MB; FINO 1: 800 MB [120 MB] vs. 50 MB.)
- Tools exist to facilitate the transformation process, most notably the on-line service Rosetta (Unidata, 2013), which generates netCDF files satisfying the CF Conventions.
- Templates to facilitate the creation of netCDF files satisfying the CF Conventions and the Attribute Conventions for Data Discovery are available (NCEI, 2015). These do not make use of hierarchical grouping, but can to a large degree be used within each group.

### 3.2.2 Limitations of Binary Formats Tested

When creating the transformed dataset files, we tested many of the features available in the HDF5 and netCDF4 formats. Not all of these features turned out to be as useful as initially expected or have sufficient software support. We here discuss features for which we encountered issues, to help others make an informed choice when considering their use.

**Compound data structures** Compound data structures are essentially tuples of values, where each component value is accessed by its name. These allow for a tight grouping of related data, for example to group all the statistics for a given signal for a given measuring interval, attach a quality flag, or to group the components of a vector (e.g., the wind velocity). However, metadata cannot be attached to the structure’s components and to read any one component, the whole structure is loaded in memory, multiplying the memory requirements. Furthermore, support for creating these structures for use in netCDF4 files using Python was buggy (we helped fix that bug) and support for reading compound value data is currently far from universal; for example, it is not included in Matlab’s netCDF interface. Also, documentation of their use is currently limited.

**2-byte floating point numbers** HDF5 allows storing 2-byte (16 bit) floating point numbers, which is more space-efficient if the precision is sufficient. The support in the core HDF5 library turned out to be buggy and support was non-existent, e.g., in Matlab.





**Scale-offset filters** Another approach for efficiently storing floating point values  $x$  is to transform them to integer values  $k$  of shorter bit-length. Namely choosing series-specific scale and offset parameters  $\alpha$  and  $\beta$  such that  $x$  is equal to  $\alpha k + \beta$  within required precision. HDF5 has a built-in filter to do this, but it does not preserve special floating point values like NaNs used for representing missing values. The ‘CF Conventions’ (Eaton et al., 2017) often used in netCDF files also describe a metadata-based approach, but not all software automatically applies the inverse transformation, so it is not transparent to the user.

**Dimensions** When creating variables, the netCDF4 format requires using defined *dimensions* (e.g., time and height). These can be shared between variables and associated to *coordinate variables* (e.g., arrays with concrete time values and instrument heights). There is also a similar concept of ‘dimension scale’ in HDF5, but it is not as convenient.

**Unicode** In principle both HDF5 and netCDF4 support Unicode text for group, variable, and attribute names and for attribute values. Software support for Unicode text in attribute values is not universal, however; notably, Matlab does not support this yet for netCDF4.

**String values** Both HDF5 and netCDF4 support variable-length strings as variable values. This can for example be useful for coordinate variables, such as when instrument position is designated by ‘left’ and ‘right’. However, again Matlab does not support this yet for netCDF4.

## 4 Recommendations

Based on our analysis of the three datasets and on our work transforming them in to binary file formats, we have the following recommendations for the **two main stakeholders**.

### Dataset producers

- Expand the automated checks **you** perform on the signals the dataset series are based on, to efficiently remove avoidable issues that are currently still present (Sect. 2.2.1).
- Make the documentation of the dataset and its creation process more comprehensive (cf. Sect. 2.2.2). This is best done by attaching metadata, **which is most likely already available in your data management systems, right next to the data**. External documentation such as data-manuals and websites, if still needed, can be semi-automatically generated from metadata that is stored in a structured way.
- Provide your datasets **(also)** in a binary format that allows for a structured combination of data and metadata (cf. Sect. 3.2). Based on our experience, we currently advise, for metocean statistics datasets, using the netCDF4 format, with
  - metadata added according to the Attribute Conventions for Dataset Discovery and CF Conventions (cf. Sect. 3.1),
  - metadata describing absolute and relative sample uncertainty (cf. Sect. 2.2.5),



- coordinate variables for all dimensions of the data variables,
- each statistic series as a separate variable, so not using compound data structures or by expanding the multidimensional array,
- values binary-**rounded according to the available uncertainties** (cf. Sect. 2.2.5), which does not preclude inclusion of ‘ancillary’ variables for the uncertainty values themselves,
- **sample standard deviations corrected for bias** (cf. Sect. 2.2.5) or inclusion of an ancillary variable for the bias (modifying the values themselves may be seen as too invasive),
- variables compressed transparently, so not using a metadata-based scale-offset filter,

Its better support for dimensions and coordinate variables is what makes the netCDF4 format currently more attractive than the plain HDF5 format.

- Add a quality flag variable for each signal (cf. Sect. 2.2.4).

#### Dataset users

- Do not trust the data blindly and perform some checks in the vein of those we discussed in Sect. 2.2.1.
- Provide feedback to the dataset producers about issues you encounter and dataset features that would have added value for your research; our experience in this regard, **especially with ECN**, is positive.
- If you are used to working with comma-separated values type formats, **do the effort** of working with a format like HDF5 or netCDF4 if the opportunity presents itself, as this will allow working more efficiently with datasets (cf. Sect. 3).

## 5 Conclusions

The questions of our study were: (i) Are these issues commonly shared in metocean datasets? (ii) How can the issues that are present be addressed?

The answer to the first question is ‘yes, but not uniformly’: The analysis of three datasets with statistics of metocean signals aimed at wind energy applications presented in Sec. 2.2 showed that indeed there are shared issues, such as the presence of unmarked faulty data (outliers, most clearly), incomplete documentation (signal accuracy, most generally), and value encoding (lack of uncertainty information, most importantly). Some issues are not shared, and one dataset can actually be seen as an example of good practice in some aspect (the quality flags included in the FINO 1 dataset, most concretely).

An abstract answer to the second question is ‘by the dataset producers, in a straightforward way, with limited effort’. More concretely:

- The techniques we used to bring faulty data to light are straightforward to implement, which supports our claim that they can be detected and fixed with relatively little effort.



- Concerning documentation: In our quest for creating a good overview of the datasets, we collected information from various sources to supplement the documentation provided; this is a time consuming task. Much of the information that we had to search for, is available to the datasets producers, so the effort for them is smaller. Given that one cannot expect all dataset users to perform data quality analyses and information collection efforts themselves, **it would be beneficial**

**5 if the dataset producers take this upon them as a duty.** This will make their datasets more useful and therefore more valuable.

- As noted above, a specific issue with the datasets was **the limited information about and quantification of the uncertainty of the dataset values**. The expressions for uncertainties and bias we derived provide a straightforward quantification of the statistics' uncertainties and bias based on the information that is typically available, absolute and relative uncertainties
- 10 for the sample values. These expressions can be used by users if needed by their application. The dataset producers can also apply them and use the uncertainty values found to improve their dataset, e.g., by rounding the dataset values (reducing the size requirements) or by including the uncertainty values as ancillary variables.

- In support of our analysis of the datasets, we created versions in a binary format. In comparison to the tabular formats in which the datasets are made available, such binary formats are more convenient for users, as they make the data
- 15 available in a much more structured format and as they are self-describing when documentation is added as metadata. The description of our effort, experiences, and feature evaluation provide a high-level guide and suggested best practices to dataset producers who wish to also improve their datasets in this way.

In summary, *this paper shows why and how metocean datasets for wind energy applications can be improved in various, useful ways, with relatively little effort.*

- 20 **Code and data availability.** Code used during the research is publicly available via GitHub and Zenodo (Quaeghebeur, 2019). For OWEZ and MMIJ, we are in the process of verifying whether we have permission to publish HDF5 and netCDF4 datasets we created. These will be put on a publicly available data repository and referenced here for the final version of this paper. For FINO 1, we know that we cannot make any such dataset available.

## Appendix A: The Datasets and Their Analysis

### 25 A1 A First Look at the Datasets

#### A1.1 MMIJ — Measuring Mast IJmuiden

In the context of a Dutch governmental research program, a met-mast was built in the Dutch part of the North Sea with the aim to gather metocean data with a frequency and quality needed for the planning and development of offshore wind farms in the Dutch North Sea. Its location is 52°50'53.4" North, 3°26'8.4" East (WGS 84), which is 82 km off the Dutch coast



near the province North-Holland. The location is indicated in Fig. 1. The mast was ready for operation in 2011 and was decommissioned by 2017. Data is available for the period November 2011–March 2016. Multiple datasets can be obtained; we restricted attention to the one for meteorological signals. The instruments used and quantities measured, and some of their characteristics are listed in Table A1.

5 The MMIJ datasets can be obtained by registering, which is free, and filling in a request form on a website of the Energy research Centre of the Netherlands (ECN). The meteorological statistics dataset can be downloaded via an e-mailed link as a single compressed semicolon-separated values (csv) file. The total size is a good 500 MB, or about 120 MB compressed. This represents data points for 229 248 10-minute intervals. The data in the csv file is structured as follows:

- 1 date-time column (YYYY-MM-DD hh:mm);
- 10 – 65 sets of four columns each: one for each of the four real-valued statistics, ‘min’, ‘max’, ‘avg’, and ‘std’; each set corresponding to a specific measured quantity and location on the mast.

The statistics’ values are encoded in a decimal fixed-point format with five fractional digits ( $x \dots x . xxxxx$ ).

Information about the dataset, the met-mast, and its context is available through the same website. In particular, there is an instrumentation report (Werkhoven and Verhoef, 2012). Some information about the instruments used and in particular the measurement uncertainty had to be looked up in spec sheets. Further clarifications were obtained through personal communication with people involved in the project (cf. Acknowledgements).

## A1.2 FINO 1 — Research Platform in the North Sea and the Baltic Sea Nr. 1

In the context of the German governmental research program FINO (for ‘Forschungsplattformen in Nord- und Ostsee’) started in 2002, three measuring stations with met-masts were built; two in the German part of the North Sea and one in the Baltic. The aim is supporting technological developments for and study the effect of off-shore wind farms. We have looked at data from the first mast erected, FINO 1, which became operational in 2003. Its location is  $54^{\circ}0'53.5''$  North,  $6^{\circ}35'15.5''$  East (WGS 84), 45 km North of the island of Borkum, near the site where the off-shore wind farm ‘Alpha Ventus’ was built in 2009–2010. The location is indicated in Fig. 1. Data from 2004 onward is available. Multiple datasets can be obtained; again we restricted attention to the one for meteorological signals. The instruments used and quantities measured, and some of their characteristics are listed in Table A2.

The FINO 1 datasets can be obtained after requesting access (BSH, a), which is free for academic research, but not so for commercial purposes; re-dissemination is not allowed. Credentials are then provided to login to the download website (BSH, a), where one can select the desired signals and time period. The resulting dataset is delivered as a compressed set of tab-separated values (dat) files, one for each selected quantity/height combination. We selected the meteorological statistics data for the years 2004–2016. The total size is a good 800 MB, or about 120 MB compressed. This represents data points for 683 856 10-minute intervals. The data in each dat file is structured as follows:

- 1 date-time column (YYYY-MM-DD hh:mm:ss);



**Table A1.** An overview of the instruments and their locations on the MMIJ met-mast (height in meters above Lowest Astronomical Tide), the quantity measured, measurement uncertainty, the measurement ranges, and the sampling frequencies.

| Instrument (#)                                  | Heights<br>[m] | Pos. <sup>b</sup> | Quantity <sup>qc</sup>         | Unit              | Uncertainty <sup>m</sup> |          | Range <sup>m</sup>                   | Freq.<br>[Hz] |
|-------------------------------------------------|----------------|-------------------|--------------------------------|-------------------|--------------------------|----------|--------------------------------------|---------------|
|                                                 |                |                   |                                |                   | abs.                     | rel. [%] |                                      |               |
| cup anemometer (8)                              | 27, 58.5       | reg.              | hor. wind sp. <sup>1</sup>     | m/s               | 0.2                      | 1        | 0.3–75                               | 4             |
|                                                 | 92             | irr.              |                                |                   |                          |          |                                      |               |
| ultrasonic anemometer (3)                       | 85             | reg.              | status <sup>1</sup>            | –                 |                          |          | {−10 <sup>3</sup> , 0} <sup>eo</sup> | 4             |
|                                                 |                |                   | wind sp. X dir. <sup>1</sup>   |                   |                          |          |                                      |               |
|                                                 |                |                   | wind sp. Y dir. <sup>1</sup>   | m/s               | 0.1                      | 2        | −60–60                               | 4             |
|                                                 |                |                   | wind sp. Z dir. <sup>1</sup>   |                   |                          |          |                                      |               |
| wind vane (9)                                   | 27, 58.5, 87   | reg.              | wind direction <sup>1</sup>    | °                 | 1                        |          | 0–360 <sup>d</sup>                   | 4             |
| barometer (2)                                   | 21, 90         |                   | atm. pressure <sup>1</sup>     | hPa               | 0.1                      |          | 500–1100                             | 4             |
| thermometer (2)                                 | 21, 90         |                   | ambient temp. <sup>1</sup>     | °C                | 0.12                     |          | −80–60                               | 4             |
| hygrometer (2)                                  | 21, 90         |                   | rel. humidity <sup>1</sup>     | %                 | 1                        |          | 0–100                                | 4             |
| precipitation detector (1)                      | 27             | U                 | precip. presence <sup>1</sup>  | –                 |                          |          | {0, 100} <sup>en</sup>               | 4             |
| precipitation monitor (2)                       | 21             | l, r              | status <sup>1</sup>            | –                 |                          |          | {0, 100} <sup>eo</sup>               | 4             |
|                                                 |                |                   | quality <sup>5</sup>           | %                 |                          |          | 0–100                                | 4             |
|                                                 |                |                   | synoptic code <sup>5</sup>     | –                 |                          |          | {0, ..., 99} <sup>ew</sup>           | 4             |
|                                                 |                |                   | precip. presence <sup>5</sup>  | –                 |                          |          | {0, 100} <sup>en</sup>               | 4             |
|                                                 |                |                   | precip. intensity <sup>5</sup> | mm/min            |                          | 15       | 0–                                   | 4             |
|                                                 |                |                   | precip. amount <sup>5, r</sup> | mm                |                          |          | 0–                                   | 4             |
|                                                 |                |                   | visibility <sup>5</sup>        | m                 |                          |          | 0–10000                              | 4             |
| from <sup>v, s</sup> cup anemometer (3)         | 27, 58.5, 92   |                   | hor. wind sp. <sup>1</sup>     | m/s               | 0.14                     |          | 0.3–75                               | 4             |
| from <sup>v</sup> ultrasonic anemometer (3)     | 85             | reg.              | wind sp. magn. <sup>1</sup>    | m/s               | 0.07                     |          | 0–104                                | 4             |
|                                                 |                |                   | hor. wind sp. <sup>1</sup>     | m/s               | 0.07                     |          | 0–85                                 | 4             |
| from <sup>v, s</sup> ultrasonic anemometer (1)  | 85             |                   | hor. wind sp. <sup>1</sup>     | m/s               | 0.05                     |          | 0–85                                 | 4             |
| from <sup>v, s</sup> wind vane (3)              | 27, 58.5, 87   |                   | wind direction <sup>1</sup>    | °                 | 0.7                      |          | 0–360 <sup>d</sup>                   | 4             |
| from <sup>v</sup> barometer and thermometer (2) | 21, 90         |                   | air density <sup>1</sup>       | kg/m <sup>3</sup> | 0.0001                   |          | 0.5–2.0                              | 4             |

<sup>b</sup> For instruments on booms, positions are boom orientations [°], with North at 46.5°, ‘reg.’ corresponds to {0, 120, 240} and ‘irr.’ to {180, 300}. For those not on booms other identifiers are used, if known.

<sup>d</sup> Means lie between 0°–360°; minima and maxima can be outside of that interval so that  $\min \leq \text{avg} \leq \max$ .

<sup>en</sup> No, Yes. <sup>eo</sup> ‘0’ = OK, non-zero = Not OK. <sup>ew</sup> Using synoptic ‘present weather’ codes defined by the World Meteorological Organization (2016, p. 356–358).

<sup>m</sup> Missing values are unknown. <sup>qc</sup> Quality code: ‘1’ = ‘ISO 17025 approved, in accordance with IEC61400-12’; ‘5’ = ‘no or unknown calibration’.

<sup>r</sup> Between sensor resets. <sup>s</sup> Correction for tower shadow by selective averaging of values at the same height.

<sup>v</sup> Virtual measurement; namely, derived from signals obtained with one or more actual instruments.



**Table A2.** An overview of the instruments and their locations on the FINO 1 met-mast (height in meters above Lowest Astronomical Tide), the quantity measured, measurement uncertainty, the measurement ranges, and the sampling frequencies.

| Instrument (#)            | Heights<br>[m]                     | Quantity          | statistics <sup>s</sup> | Unit             | Uncertainty <sup>m</sup><br>abs. rel. [%] |   | Range <sup>m</sup>  | Freq.<br>[Hz] |
|---------------------------|------------------------------------|-------------------|-------------------------|------------------|-------------------------------------------|---|---------------------|---------------|
| cup anemometer (8)        | 34, 41, 51, 61,<br>71, 81, 91, 102 | hor. wind sp.     | − + $\mu$ $\sigma$      | m/s              | 0.1                                       | 1 | 0.1–75              | 1             |
| ultrasonic anemometer (3) | 42, 62, 82                         | hor. wind sp.     | − + $\mu$ $\sigma$      | m/s              | 0.01                                      | 1 | 0–45                | 50            |
|                           |                                    | wind direction    | $\mu$ $\sigma$          | °                | 1                                         |   | 0–359               | 50            |
| wind vane (9)             | 34, 51, 71, 91                     | wind direction    | + $\mu$ $\sigma$        | °                | 2                                         |   | 0–360               | 1             |
| barometer (2)             | 21, 93                             | atm. pressure     | $\mu$                   | hPa              | 0.3                                       |   | 800–1060            | 1             |
| thermometer (5)           | 34, 42, 52, 72, 101                | ambient temp.     | $\mu$                   | °C               | 0.1                                       |   |                     | 1             |
| hygrometer (5)            | 34, 42, 52, 72, 101                | rel. humidity     | $\mu$                   | %                | 3                                         |   | 10–100              | 1             |
| precipitation monitor (2) | 23, 101                            | precip. presence  | meas. <sup>v</sup>      | –                |                                           |   | {0, 1} <sup>c</sup> |               |
| precipitation sensor (1)  | 23                                 | precip. intensity | $\mu$                   | mA               |                                           |   | 4–20                | 1             |
| pyranometer (2)           | 34, 93                             | global radiation  | $\mu$                   | W/m <sup>2</sup> |                                           | 3 | 0–4000              | 1             |

<sup>c</sup> No, Yes. <sup>m</sup> Missing values are unknown.

<sup>s</sup> Statistics included (with column name): ‘−’ = minimum (‘Minimum’), ‘+’ = maximum (‘Maximum’), ‘ $\mu$ ’ = mean (‘Value’), ‘ $\sigma$ ’ = standard deviation (‘Deviation’).

<sup>v</sup> The measurement is given (in the ‘Value’ column), as there is essentially one measurement per ten minutes.

- 4 statistics columns, ‘Value’, ‘Minimum’, ‘Maximum’, and ‘Deviation’;
- 1 quality column (‘0’ = raw, ‘1’ = doubtful quality, ‘2’ = quality controlled).

The statistics’ values are encoded in a decimal fixed-point format with up to two fractional digits (x...x.xx).

- Information about the dataset, the met-mast, and its context is available through the platform’s websites (FINO 1; BSH,
- 5 b). A detailed overview table regarding the mast’s instrumentation (DEWI, 2015) is available upon request by email. Some information about the instruments used and in particular the measurement ranges had to be looked up in spec sheets. Further clarifications were obtained through personal communication with people involved in the project (cf. Acknowledgements).

Others have looked at the FINO 1 data before. For example, detailed studies have been performed on the wind speed data gathered (Westerhellweg et al., 2012; Stepek et al., 2015).

## 10 A2 Dataset Issues

### A2.1 Maximum and Minimum for Directional Data

We here give a proposal for definitions of maximum and minimum for directional data. We assume the sampling frequency is high enough to make direction changes larger than 180° for successive samples practically impossible.



Transform the direction sequence from  $0^\circ$ – $360^\circ$  to the real line so that ‘ $360^\circ$  jumps’ are removed; e.g., the sequence  $356^\circ$ ,  $358^\circ$ ,  $1^\circ$  and  $4^\circ$  would become  $356^\circ$ ,  $358^\circ$ ,  $361^\circ$  and  $364^\circ$ . Call the minimum and maximum of this transformed sequence  $\chi$  and  $\xi$ ; so  $\chi = 356^\circ$  and  $\xi = 364^\circ$  in our example. If  $\xi - \chi > 360^\circ$  the direction has changed at least one full rotation for the given sequence. Let  $\mu$  be the (vector) mean, expressed within  $0^\circ$ – $360^\circ$ ; so  $\mu \approx 359.75^\circ$  in our example. Now choose  $k$  such  
 5 that  $\chi + k 360^\circ \leq \mu \leq \xi + k 360^\circ$  with  $\max\{|\chi + k 360^\circ - \mu|, |\xi + k 360^\circ - \mu|\}$  minimal;  $k = 0$  in our example. Then  $\chi + k 360^\circ$  and  $\xi + k 360^\circ$  are the sought for minimum and maximum.

## A2.2 Statistic Value Uncertainty

The statistics present in the dataset are derived from  $n$  measurements  $x_k$  uniformly sampled over a length- $T$  interval, where  $T = 600$ s for the datasets we consider. To get a view on the uncertainty of the statistics, we model the process generating the  
 10 measurements as follows: There is an underlying signal  $y$  with samples  $y_k = y(t_k)$ . On measurement, noise is added, so that  $x_k = y_k + e_k$  for all  $k \in \{1, \dots, n\}$ . The noise is assumed to consist of independent absolute and relative zero-mean Gaussian components, i.e.,  $e_k = \varepsilon_a z_{a,k} + \varepsilon_r y_k z_{r,k}$  with  $z_{r,k}$  and  $z_{a,k}$  samples from independent standard normal distributions, so that the component’s standard deviations are  $\varepsilon_a$  and  $\varepsilon_r y_k$ .

We first consider the contribution of sampling and then the contribution of the noise to the uncertainty of the statistics.

### 15 Uncertainty due to sampling

The ‘ideal’ statistic values are defined in terms of the continuous-time signal:

$$\tilde{y}_c = \min_{t \in [0, T]} y(t), \quad \hat{y}_c = \max_{t \in [0, T]} y(t), \quad \bar{y}_c = \frac{1}{T} \int_0^T y(t) dt, \quad s_{y,c}^2 = \frac{1}{T} \int_0^T (y(t) - \bar{y}_c)^2 dt. \quad (A1)$$

The ‘noiseless’ sample statistics values are

$$\tilde{y} = \min_{k \in \{1, \dots, n\}} y_k, \quad \hat{y} = \max_{k \in \{1, \dots, n\}} y_k, \quad \bar{y} = \frac{1}{n} \sum_{k=1}^n y_k, \quad s_y^2 = \frac{1}{n} \sum_{k=1}^n (y_k - \bar{y})^2, \quad (A2)$$

20 where for the sample variance  $s_y^2$ , we did not apply the usual bias correction because  $n$  is assumed sufficiently large.

As we assume is done in the datasets, we take  $t_k = (k - 1) \frac{1}{n} T$ . So we are applying the ‘Left Rule’ numerical integration method (see, e.g., Tucker, 1997) to get estimates  $\bar{y}$  for  $\bar{y}_c$  and  $s_y^2$  for  $s_{y,c}^2$ . A corresponding error estimate is  $\frac{T^2}{2n} |\sum_{k=1}^n f'(t_k)|$ , where  $f$  is equal to  $\frac{1}{T} y$  and  $\frac{1}{T} (y - \bar{y}_c)^2$  respectively. An estimate for the sum of derivatives is obtained by assuming  $y$  is linear, i.e.,  $y' \approx \frac{\hat{y} - \tilde{y}}{T}$  and  $((y - \bar{y}_c)^2)' = 2(y - \bar{y}_c)y' \approx 2s_y \frac{\hat{y} - \tilde{y}}{T}$ . Similarly, for uncertainty estimates of the maximum and minimum  
 25 statistics we assume that the signal continues to linearly increase (decrease) for half a sample step beyond the maximum (minimum) sample.

To get concrete values, we replace the noiseless statistics with the actual noisy ones. This results in the following expressions:

$$\tau_{\tilde{y}} \approx \frac{\hat{x} - \tilde{x}}{2n}, \quad \tau_{\hat{y}} \approx \frac{\hat{x} - \tilde{x}}{2n}, \quad \tau_{\bar{y}} \approx \frac{\hat{x} - \tilde{x}}{2n}, \quad \tau_{s_y^2} \approx s_x \frac{\hat{x} - \tilde{x}}{n}, \quad \tau_{s_y} \approx \frac{1}{2s_x} \tau_{s_y^2} \approx \frac{\hat{x} - \tilde{x}}{2n}, \quad (A3)$$



where the uncertainty for the standard deviation  $s_y$  was derived from the one for the variance by applying a first order Taylor approximation of the square root. In case the minimum and maximum statistics are not available, but the sample standard deviation is, one could use the crude estimates  $\check{x} \approx \bar{x} - z_{1-1/n} s_x$  and  $\hat{x} \approx \bar{x} + z_{1-1/n} s_x$ , where  $z_{1-1/n}$  is the standard normal quantile for exceedance probability  $1/n$ .

## 5 A2.3 Uncertainty due to measurement noise

We use the following random variables to model the process that adds noise to the measurements:  $X_k$  for the measurements and  $E_k$  for the noise, with auxiliary standard normal variables  $Z_{a,k}$  and  $Z_{r,k}$ , so that  $X_k = y_k + E_k$  with  $E_k = \varepsilon_a Z_{a,k} + \varepsilon_r y_k Z_{r,k}$ . Here, the basic random variables  $Z_{a,k}$  and  $Z_{r,k}$  are assumed to be independent from each other and all other random variables  $Z_{a,\ell}$ ,  $Z_{r,\ell}$ ,  $\ell \neq k$ .

- 10 Some further notation:  $\mathbb{E}$  is the expectation operator.  $\text{Var}$  and  $\text{Cov}$  are the variance and covariance operators, respectively, defined by for any random variables  $V$  and  $W$  by  $\text{Cov}(V, W) = \mathbb{E}((V - \mathbb{E}(V))(W - \mathbb{E}(W)))$  and  $\text{Var}(V) = \text{Cov}(V, V)$ . Furthermore, we let  $\check{V} = \min_{k=1}^n V_k$ ,  $\hat{V} = \max_{k=1}^n V_k$ ,  $\bar{V}^{(p)} = \frac{1}{n} \sum_{k=1}^n V_k^p$ , with  $\bar{V} = \bar{V}^{(1)}$ , and  $s_V^2 = \frac{1}{n} \sum_{k=1}^n (V_k - \bar{V})^2$ .

Recall that standard normal variables  $Z$  are completely determined by their expectation  $\mathbb{E}(Z) = 0$  and variance  $\text{Var}(Z) = \mathbb{E}(Z^2) = 1$ . Also, the expectation of any odd power is zero:  $\mathbb{E}(Z^{2m+1}) = 0$ .

- 15 For the sample minimum and maximum we assume that the measurement noise does not substantially influence the order statistics, so  $\check{X} = \check{y} + E_{\check{k}}$  and  $\hat{X} = \hat{y} + E_{\hat{k}}$ . (Otherwise this noise introduces bias in the estimate and an extra term in the variance (see Cramér, 1946, Equation 28.6.16).) This implies

$$\check{x} \approx \mathbb{E}(\check{X}) = \check{y} + \mathbb{E}(E_{\check{k}}) = \check{y}, \quad \sigma_{\check{y}}^2 = \text{Var}(\check{X}) = \text{Var}(E_{\check{k}}) = \varepsilon_a^2 + \varepsilon_r^2 \check{y}^2, \quad (\text{A4})$$

$$\hat{x} \approx \mathbb{E}(\hat{X}) = \hat{y} + \mathbb{E}(E_{\hat{k}}) = \hat{y}, \quad \sigma_{\hat{y}}^2 = \text{Var}(\hat{X}) = \text{Var}(E_{\hat{k}}) = \varepsilon_a^2 + \varepsilon_r^2 \hat{y}^2, \quad (\text{A5})$$

- 20 because

$$\mathbb{E}(E_k) = \varepsilon_a \mathbb{E}(Z_{a,k}) + \varepsilon_r y_k \mathbb{E}(Z_{r,k}) = 0,$$

$$\text{Var}(E_k) = \varepsilon_a^2 \text{Var}(Z_{a,k}) + \varepsilon_r^2 y_k^2 \text{Var}(Z_{r,k}) = \varepsilon_a^2 + \varepsilon_r^2 y_k^2,$$

where for the variance the first equality follows from independence of the variables  $Z_{a,k}$  and  $Z_{r,k}$ .

For the sample mean we can deduce that

$$25 \quad \bar{x} \approx \mathbb{E}(\bar{X}) = \bar{y} + \mathbb{E}(\bar{E}) = \bar{y} \quad \text{and} \quad \sigma_{\bar{y}}^2 = \text{Var}(\bar{X}) = \text{Var}(\bar{E}) = \frac{1}{n} (\varepsilon_a^2 + \varepsilon_r^2 (\bar{y}^2 + s_y^2)) \quad (\text{A6})$$

because

$$\mathbb{E}(\bar{E}) = \frac{1}{n} \sum_{k=1}^n (\varepsilon_a \mathbb{E}(Z_{a,k}) + \varepsilon_r \mathbb{E}(Z_{r,k})) = 0,$$

$$\text{Var}(\bar{E}) = \frac{1}{n^2} \sum_{k=1}^n (\varepsilon_a^2 \text{Var}(Z_{a,k}) + \varepsilon_r^2 y_k^2 \text{Var}(Z_{r,k}))$$

$$= \frac{1}{n^2} \sum_{k=1}^n (\varepsilon_a^2 + \varepsilon_r^2 y_k^2) = \frac{1}{n} (\varepsilon_a^2 + \varepsilon_r^2 \frac{1}{n} \sum_{k=1}^n y_k^2) = \frac{1}{n} (\varepsilon_a^2 + \varepsilon_r^2 \bar{y}^{(2)}) = \frac{1}{n} (\varepsilon_a^2 + \varepsilon_r^2 (\bar{y}^2 + s_y^2)),$$



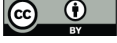

because it holds that  $\bar{y}^{(2)} = \bar{y}^2 + s_y^2$ .

For the sample standard deviation  $s_X$ , we use the first order Taylor expansion of the square root  $s_X = \sqrt{s_X^2}$  with  $s_X^2$  varying around  $\mathbb{E}(s_X^2)$ :

$$\sqrt{s_X^2} \approx \sqrt{\mathbb{E}(s_X^2)} + \frac{1}{2\sqrt{\mathbb{E}(s_X^2)}}(s_X^2 - \mathbb{E}(s_X^2)).$$

5 So first order approximations of the expectation and variance are

$$s_x \approx \mathbb{E}(s_X) \approx \sqrt{\mathbb{E}(s_X^2)} \quad \text{and} \quad \sigma_{s_y}^2 = \text{Var}(s_X) \approx \frac{1}{4\mathbb{E}(s_X^2)} \text{Var}(s_X^2). \quad (\text{A7})$$

So we see that we actually need to calculate  $\mathbb{E}(s_X^2)$  and  $\text{Var}(s_X^2)$ , the expectation and variance of the sample variance.

Let us first write this sample variance in terms of our model variables:

$$s_X^2 = \bar{X}^{(2)} - \bar{X}^2 = \bar{y}^{(2)} + 2\bar{y}\bar{E} + \bar{E}^{(2)} - \bar{y}^2 - 2\bar{y}\bar{E} - \bar{E}^2 = s_y^2 + s_E^2 + 2(\bar{y}\bar{E} - \bar{y}\bar{E}).$$

10 Then

$$\mathbb{E}(s_X^2) = s_y^2 + \mathbb{E}(s_E^2) + 2(\mathbb{E}(\bar{y}\bar{E}) - \bar{y}\mathbb{E}(\bar{E})) = s_y^2 + \mathbb{E}(s_E^2) + 0 = s_y^2 + \mathbb{E}(\bar{E}^{(2)} - \bar{E}^2) = s_y^2 + (1 - \frac{1}{n})(\varepsilon_a^2 + \varepsilon_r^2 \bar{y}^{(2)}) \quad (\text{A8})$$

because

$$\begin{aligned} \mathbb{E}(\bar{y}\bar{E}) &= \frac{1}{n} \sum_{k=1}^n y_k \mathbb{E}(E_k) = 0, \\ \mathbb{E}(\bar{E}^{(2)}) &= \frac{1}{n} \sum_{k=1}^n (\varepsilon_a^2 \mathbb{E}(Z_{a,k}^2) + 2\varepsilon_a \varepsilon_r y_k \mathbb{E}(Z_{a,k}) \mathbb{E}(Z_{r,k}) + \varepsilon_r^2 y_k^2 \mathbb{E}(Z_{r,k}^2)) = \varepsilon_a^2 + \varepsilon_r^2 \bar{y}^{(2)}, \\ 15 \quad \mathbb{E}(\bar{E}^2) &= \frac{1}{n^2} \sum_{k=1}^n \sum_{\ell=1}^n (\varepsilon_a^2 \mathbb{E}(Z_{a,k} Z_{a,\ell}) + \varepsilon_a \varepsilon_r (y_k \mathbb{E}(Z_{a,\ell}) \mathbb{E}(Z_{r,k}) + y_\ell \mathbb{E}(Z_{a,k}) \mathbb{E}(Z_{r,\ell})) + \varepsilon_r^2 y_k y_\ell \mathbb{E}(Z_{r,k} Z_{r,\ell})) \\ &= \frac{1}{n} (\varepsilon_a^2 + \varepsilon_r^2 \bar{y}^{(2)}). \end{aligned}$$

Furthermore

$$\text{Var}(s_X^2) = \text{Var}(s_E^2) + 4 \text{Var}(\bar{y}\bar{E} - \bar{y}\bar{E}) + 4 \text{Cov}(s_X^2, \bar{y}\bar{E} - \bar{y}\bar{E}).$$

20 The last term of this expression is zero because all terms of its expansion contain odd powers of independent standard normal random variables. We do not perform the tedious calculation of the first term, as it essentially expresses the uncertainty of the measurement noise, which has been left unmodeled. Therefore we *ignore* this term, which means we consider a lower bound:

$$\begin{aligned} \frac{1}{4} \text{Var}(s_X^2) &\geq \text{Var}(\bar{y}\bar{E} - \bar{y}\bar{E}) \\ &= \text{Var}(\bar{y}\bar{E}) + \bar{y}^2 \text{Var}(\bar{E}) - 2\bar{y} \text{Cov}(\bar{y}\bar{E}, \bar{E}) \\ &= \mathbb{E}(\bar{y}\bar{E}^2) - \mathbb{E}(\bar{y}\bar{E})^2 + \bar{y}^2 (\mathbb{E}(\bar{E}^2) - \mathbb{E}(\bar{E})^2) - 2\bar{y} (\mathbb{E}(\bar{y}\bar{E}\bar{E}) - \mathbb{E}(\bar{y}\bar{E})\mathbb{E}(\bar{E})) \\ 25 \quad &= \mathbb{E}(\bar{y}\bar{E}^2) + \bar{y}^2 \mathbb{E}(\bar{E}^2) - 2\bar{y} \mathbb{E}(\bar{y}\bar{E}\bar{E}) \\ &= \frac{1}{n} (\varepsilon_a^2 \bar{y}^{(2)} + \varepsilon_r^2 \bar{y}^{(4)}) + \bar{y}^2 \frac{1}{n} (\varepsilon_a^2 + \varepsilon_r^2 \bar{y}^{(2)}) - 2\bar{y} \frac{1}{n} (\varepsilon_a^2 \bar{y} + \varepsilon_r^2 \bar{y}^{(3)}), \end{aligned}$$



where in the last step the first and last terms' calculation is analogous to the one of  $\mathbb{E}(\bar{E}^2)$  above. It holds that  $\bar{y}^{(2)} = \bar{y}^2 + s_y^2$  and because we have no estimate for  $\bar{y}^{(3)}$  and  $\bar{y}^{(4)}$ , we use the Gaussian case, i.e., we assume  $\bar{y}^{(3)} \approx \bar{y}^3 + 3\bar{y}s_y^2$  and  $\bar{y}^{(4)} \approx \bar{y}^4 + 6\bar{y}^2s_y^2 + 3s_y^4$  (Johnson et al., 1994, Ch. 13). This gives

$$\frac{n}{4} \text{Var}(s_X^2) \geq \varepsilon_a^2 s_y^2 + \varepsilon_r^2 (\bar{y}^{(4)} + \bar{y}^2 \bar{y}^{(2)} - 2\bar{y} \bar{y}^{(3)}) \approx \varepsilon_a^2 s_y^2 + \varepsilon_r^2 s_y^2 (\bar{y}^2 + 3s_y^2) = s_y^2 (\varepsilon_a^2 + \varepsilon_r^2 (\bar{y}^2 + 3s_y^2)).$$

5 Going back to the sample standard deviation in Eq. A7, using Eq. A8, and assuming  $n \gg 1$  and  $\varepsilon_r^2 \ll 1$  we get

$$s_x \approx \mathbb{E}(s_X) \approx \sqrt{s_y^2 + (\varepsilon_a^2 + \varepsilon_r^2 \bar{y}^{(2)})} \quad \text{so} \quad s_y^2 \approx \frac{1}{1 + \varepsilon_r^2} (s_x^2 - (\varepsilon_a^2 + \varepsilon_r^2 \bar{y}^2)) \approx s_x^2 - (\varepsilon_a^2 + \varepsilon_r^2 \bar{y}^2), \quad (\text{A9})$$

$$\sigma_{s_y}^2 = \text{Var}(s_X) \geq \frac{s_y^2}{s_y^2 + (\varepsilon_a^2 + \varepsilon_r^2 \bar{y}^{(2)})} \frac{1}{n} (\varepsilon_a^2 + \varepsilon_r^2 (\bar{y}^2 + 3s_y^2)) \approx \frac{1}{n} (\varepsilon_a^2 + \varepsilon_r^2 (\bar{y}^2 + 3s_y^2)), \quad (\text{A10})$$

where for the last approximation we assumed that the measurement noise's contribution to the sample standard deviation is negligible ( $s_y^2 \gg \varepsilon_a^2 + \varepsilon_r^2 \bar{y}^2$ ).<sup>4</sup> In any case, in general the bias in  $s_x$  as an estimator of  $s_y$  dwarfs the estimate of the uncertainty  $\sigma_{s_y}$  due to the measurement noise. Even the uncertainty in the bias (the unmodeled uncertainty of the measurement noise) may overwhelm  $\sigma_{s_y}$ . These considerations lead us to conclude that the lower bound we give is conservative in general and that the real uncertainty can be substantially larger.

To get concrete values, we replace  $\check{y}$ ,  $\hat{y}$ ,  $\bar{y}$  and  $s_y^2$  appearing in the expressions for the uncertainties by their estimates. We also deal with the corner case  $s_x^2 < \varepsilon_a^2 + \varepsilon_r^2 \bar{x}^2$ . This results in the following estimates for the expectations and uncertainty, again assuming  $\varepsilon_r^2 \ll 1$ :

$$\check{y} \approx \check{x}, \quad \sigma_{\check{y}}^2 \approx \varepsilon_a^2 + \varepsilon_r^2 \check{x}^2 \quad (\text{A11})$$

$$\hat{y} \approx \hat{x}, \quad \sigma_{\hat{y}}^2 \approx \varepsilon_a^2 + \varepsilon_r^2 \hat{x}^2 \quad (\text{A12})$$

$$\bar{y} \approx \bar{x}, \quad \sigma_{\bar{y}}^2 \approx \frac{1}{n} (\varepsilon_a^2 + \varepsilon_r^2 (\bar{x}^2 + s_x^2)), \quad (\text{A13})$$

$$s_y \approx \sqrt{\max\{s_x^2 - (\varepsilon_a^2 + \varepsilon_r^2 \bar{x}^2), 0\}}, \quad \sigma_{s_y}^2 \geq \frac{1}{n} (\varepsilon_a^2 + \varepsilon_r^2 (\bar{x}^2 + 3s_x^2)). \quad (\text{A14})$$

## 20 A2.4 Combined uncertainty

To arrive at a total uncertainty, we combine them using the combination rule for independent uncertainties from classical error propagation (Taylor, 1997):

$$\varepsilon_{\check{x}} = \sqrt{\tau_{\check{y}}^2 + \sigma_{\check{y}}^2}, \quad \varepsilon_{\hat{x}} = \sqrt{\tau_{\hat{y}}^2 + \sigma_{\hat{y}}^2}, \quad \varepsilon_{\bar{x}} = \sqrt{\tau_{\bar{y}}^2 + \sigma_{\bar{y}}^2}, \quad \varepsilon_{s_x} = \sqrt{\tau_{s_y}^2 + \sigma_{s_y}^2}. \quad (\text{A15})$$

Here we use  $x$  instead of  $y$  in the left-hand side subscripts because outside of this appendix there is no need to refer to the underlying model we use.

<sup>4</sup> The standard for what is negligible differs between estimates of statistics and of uncertainties thereof. For example,  $\frac{\varepsilon_a^2 + \varepsilon_r^2 \bar{y}^2}{s_y^2} = 10\%$  is non-negligible in Eq. A9, but is negligible in Eq. A10.



*Author contributions.* Erik Quaeghebeur performed the brunt of the work and wrote the paper. Michiel Zaaier provided essential feedback on almost all aspects of the work in regular discussions, and so made sure errors were weeded out or avoided from the start. He also did revision work on the paper.

*Competing interests.* The authors declare that they have no competing interests.

- 5 *Acknowledgements.* This research is part of the Dutch EUROS program, which is supported by NWO domain Applied and Engineering Sciences and partly funded by the Dutch Ministry of Economic Affairs.

We thank Marc de Hoop (Mierij Meteo Systems) and Sicco Kamminga (Nortek) for providing useful information about various OWEZ instruments and Peter Eecen (ECN) for providing additional information about the measurement setup. In the context of our investigation of the MMIJ dataset, extensive communication with people of ECN took place; we thank Hans Verhoef, Arno van der Werff, and Ingmar Alting  
10 for their time and effort, and Johan Peeringa and Clym Stock-Williams for facilitating this communication. Regarding FINO 1, we thank Olaf Outzen (BSH: Bundesamt für Seeschifffahrt und Hydrographie), Markus Kreklau (BSH), and Richard Fruehmann (UL International GmbH - DEWI) for furnishing instrumentation information and for their replies to inquiries.

We thank two reviewers of an earlier version of this paper for their useful feedback, suggestions, and pointers. These have improved its focus and coverage.



## References

- Attribute convention for data discovery (version 1.3), [http://wiki.esipfed.org/index.php/Attribute\\_Convention\\_for\\_Data\\_Discovery\\_1-3](http://wiki.esipfed.org/index.php/Attribute_Convention_for_Data_Discovery_1-3), visited 2019-05-20, 2015.
- Aggarwal, C. C.: Outlier analysis, Springer, 2 edn., <https://doi.org/10.1007/978-3-319-47578-3>, 2017.
- 5 Brower, M. C., ed.: Data validation, chap. 9, pp. 117–129, John Wiley & Sons, <https://doi.org/10.1002/9781118249864.ch9>, 2012.
- BSH: FINO - Plot und Download, <http://fino.bsh.de/>, visited 2017-09-26, a.
- BSH: FINO, [http://www.bsh.de/en/Marine\\_data/Projects/FINO/index.jsp](http://www.bsh.de/en/Marine_data/Projects/FINO/index.jsp), visited 2017-09-26, b.
- Colette, A.: HDF5 for Python, <http://www.h5py.org/>, visited 2018-01-22, 2017.
- Cowlshaw, M., ed.: IEEE Standard for Floating-Point Arithmetic, IEEE, <https://doi.org/10.1109/IEEESTD.2008.4610935>, 2008.
- 10 Cramér, H.: Mathematical methods of statistics, Princeton University Press, 1946.
- Curvers, A.: Surrounding obstacles influencing the OWEZ meteo mast measurements, Tech. Rep. ECN-WindMemo-07-041, ECN, [http://www.noordzeewind.nl/wp-content/uploads/2012/02/OWEZ\\_R\\_181\\_T0\\_20070821\\_undisturbed\\_wind.pdf](http://www.noordzeewind.nl/wp-content/uploads/2012/02/OWEZ_R_181_T0_20070821_undisturbed_wind.pdf), 2007.
- DEWI: FINO1 – Meta Data, techreport, UL International GmbH – DEWI, 2015.
- Eaton, B., Gregory, J., Drach, B., Taylor, K., Hankin, S., Blower, J., Caron, J., Signell, R., Bentley, P., Rappa, G., Höck, H., Pamment, A.,
- 15 Juckes, M., and Raspaud, M.: CF Conventions, <http://cfconventions.org/>, visited 2018-02-06, 2017.
- ECN: Wind op Zee: Meteomast IJmuiden, <https://www.windopzee.net/meteomast-ijmuiden-mmij/>, visited 2017-09-19.
- Eecen, P. J. and Branlard, E.: The OWEZ Meteorological Mast: Analysis of mast-top displacements, Tech. Rep. ECN-E-08-067, ECN, <https://www.ecn.nl/publicaties/ECN-E--08-067>, 2008.
- FINO 1: Forschungsplattformen in Nord- und Ostsee Nr.1, <http://www.fino1.de/en/>, visited 2017-09-26.
- 20 Fisher, N. I.: Statistical analysis of circular data, Cambridge University Press, 1995.
- Hoyer, S. and Hamman, J.: xarray: N-D labeled arrays and datasets in Python, Journal of Open Research Software, 5, <https://doi.org/10.5334/jors.148>, 2017.
- Hoyer, S., Fitzgerald, C., Hamman, J., Kleeman, A., Maussion, F., Kluyver, T., Roos, M., Wolfram, P., Markel, Helmus, J. J., Cable, P., Abernathey, R., Bovy, B., Noel, V., Fujii, K., Kanmae, T., Miles, A., Hill, S., crusaderky, chunweiyuan, Sinclair, S., Filipe, Delley, Y., Clark,
- 25 S., Wilson, R., Gidden, M., Signell, J., Holl, G., Laliberté, F., and Malevich, B.: pydata/xarray, <https://doi.org/10.5281/zenodo.804532>, Hoyer and Hamman (2017) give an overview of this software library., 2017.
- ISO/TC 211: ISO 19115-1:2014: Geographic information – Metadata – Part 1: Fundamentals, ISO, <https://www.iso.org/standard/53798.html>, visited 2019-05-14, 2014.
- ISO/TC 211: ISO 19115-2:2019, ISO, 2 edn., <https://www.iso.org/standard/67039.html>, visited 2019-05-20, 2019.
- 30 Johnson, N. L., Kotz, S., and Balakrishnan, N.: Continuous univariate distributions, vol. 1, Wiley & Sons, 2 edn., 1994.
- Joint Committee for Guides in Metrology: International vocabulary of metrology (VIM), JCGM 200:2008 with minor corrections, 2012.
- Kouwenhoven, H. J.: User manual data files meteorological mast NoordzeeWind, <http://www.noordzeewind.nl/wp-content/uploads/2012/02/NZW-16-S-4-R03%20Manual%20data%20files%20meteo%20mast%20NoordzeeWind.pdf>, 2007.
- Lindner, P.: Definition of tab-separated-values (tsv), <https://www.iana.org/assignments/media-types/text/tab-separated-values>, 1993.
- 35 Matula, D. W.: In-and-out conversions, Communications of the ACM, 11, 47–50, <https://doi.org/10.1145/362851.362887>, 1968.
- McKinney, W. et al.: pandas, <http://pandas.pydata.org/>, 2016.



- Meek, D. W. and Hatfield, J. L.: Data quality checking for single station meteorological databases, *Agricultural and Forest Meteorology*, 69, 85–109, [https://doi.org/10.1016/0168-1923\(94\)90083-3](https://doi.org/10.1016/0168-1923(94)90083-3), 1994.
- NCEI: NCEI NetCDF Templates (version 2.0), <https://www.nodc.noaa.gov/data/formats/netcdf/v2.0>, visited 2019-05-20, 2015.
- NoordzeeWind: NoordzeeWind: Reports & data, <http://www.noordzeewind.nl/en/knowledge/reportsdata/>, visited 2017-09-14.
- 5 Quaegebeur, E.: equaeghe/met-data-scripts: Version 0.2.0, <https://doi.org/10.5281/zenodo.3352011>, 2019.
- Rew, R. K., Hartnett, E. J., and Caron, J.: NetCDF-4: software implementing an enhanced data model for the geosciences, in: *Proceedings of the 22nd International Conference on Interactive Information Processing Systems for Meteorology, Oceanography, and Hydrology*, [https://ams.confex.com/ams/Annual2006/techprogram/paper\\_104931.htm](https://ams.confex.com/ams/Annual2006/techprogram/paper_104931.htm), 2006.
- Riede, M., Schueppel, R., Sylvester-Hvid, K. O., Kühne, M., Röttger, M. C., Zimmermann, K., and Liehr, A. W.: On the communication of  
 10 scientific data: The Full-Metadata Format, *Computer Physics Communications*, 181, 651–662, <https://doi.org/10.1016/j.cpc.2009.11.014>, 2010.
- Shafranovich, Y.: Common format and MIME type for comma-separated values (CSV) files, <https://tools.ietf.org/html/rfc4180>, 2005.
- Shiffler, R. E. and Harsha, P. D.: Upper and lower bounds for the sample standard deviation, *Teaching Statistics*, 2, 84–86, <https://doi.org/10.1111/j.1467-9639.1980.tb00398.x>, 1980.
- 15 Stepek, A., Savenije, M., van den Brink, H. W., and Wijnant, I. L.: Validation of KNW atlas with publicly available mast observations, techreport 352, KNMI, <http://bibliotheek.knmi.nl/knmipubTR/TR352.pdf>, visited 2018-04-20, 2015.
- Taylor, J. R.: *An introduction to error analysis*, University Science Books, 2 edn., 1997.
- Tennison, J., Kellogg, G., and Herman, I.: Model for tabular data and metadata on the web, <https://www.w3.org/TR/2015/REC-tabular-data-model-20151217/>, 2015.
- 20 The HDF Group: Hierarchical Data Format, version 5, <http://www.hdfgroup.org/HDF5/>, visited 2018-01-22, 2017a.
- The HDF Group: Software ecosystem, <https://www.hdfgroup.org/community/software-ecosystem/>, visited 2018-01-22, 2017b.
- Tucker, T. W.: Rethinking rigor in calculus: The role of the mean value theorem, *The American Mathematical Monthly*, 104, 231–240, <https://doi.org/10.2307/2974788>, 1997.
- Unidata: Rosetta, <https://doi.org/10.5065/D6N878N2>, <https://rosetta.unidata.ucar.edu>, 2013.
- 25 Unidata: NetCDF4-Python, <http://unidata.github.io/netcdf4-python/>, visited 2018-01-22, 2015.
- Unidata: Network Common Data Form (netCDF), <https://doi.org/10.5065/D6H70CW6>, 2016.
- Unidata: Software for manipulating or displaying NetCDF data, <https://www.unidata.ucar.edu/software/netcdf/software.html>, visited 2018-01-22, 2018.
- Wagenaar, J. W. and Eecen, P. J.: 3D Turbulence at the Offshore Wind Farm Egmond aan Zee, Tech. Rep. ECN-E–10-075, ECN, <https://www.ecn.nl/publicaties/ECN-E--10-075>, 2010a.
- 30 Wagenaar, J. W. and Eecen, P. J.: Current Profiles at the Offshore Wind Farm Egmond aan Zee, Tech. Rep. ECN-E–10-076, ECN, <https://www.ecn.nl/publicaties/ECN-E--10-076>, 2010b.
- Walsh, P. and Pollock, R.: Data Package, <http://frictionlessdata.io/data-packages>, visited 2019-05-20, 2019.
- Werkhoven, E. J. and Verhoef, J. P.: Meteorological mast IJmuiden: Abstract of instrumentation report, techreport ECN-Wind Memo-12-010, ECN, [https://www.windopzee.net/fileadmin/windopzee/user/ECN-Wind\\_Memo-12-010\\_Abstract\\_of\\_Instrumentatierapport\\_Meetmast\\_IJmuiden.pdf](https://www.windopzee.net/fileadmin/windopzee/user/ECN-Wind_Memo-12-010_Abstract_of_Instrumentatierapport_Meetmast_IJmuiden.pdf), 2012.
- 35 Westerhellweg, A., Neumann, T., and Riedel, V.: FINO1 Mast Correction, *DEWI Magazin*, p. 60–66, [https://www.dewi.de/dewi\\_res/fileadmin/pdf/publications/Magazin\\_40/09.pdf](https://www.dewi.de/dewi_res/fileadmin/pdf/publications/Magazin_40/09.pdf), 2012.

<https://doi.org/10.5194/wes-2019-42>  
Preprint. Discussion started: 26 July 2019  
© Author(s) 2019. CC BY 4.0 License.

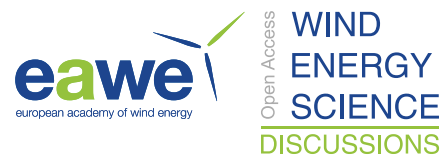

Wickham, H.: Tidy Data, Journal of Statistical Software, 59, 1–23, <https://doi.org/10.18637/jss.v059.i10>, 2014.

World Meteorological Organization: Manual on Codes, updated 2011 edn., [https://library.wmo.int/opac/index.php?lvl=notice\\_display&id=13617](https://library.wmo.int/opac/index.php?lvl=notice_display&id=13617), 2016.
