# Supplementary figures and images for: How to improve your metocean datasets
Source: Copernicus journal article supplement (doi:10.5194/wes-2019-42), 2019-07-26

FINO1 UA/Wr (wind direction, units: °)

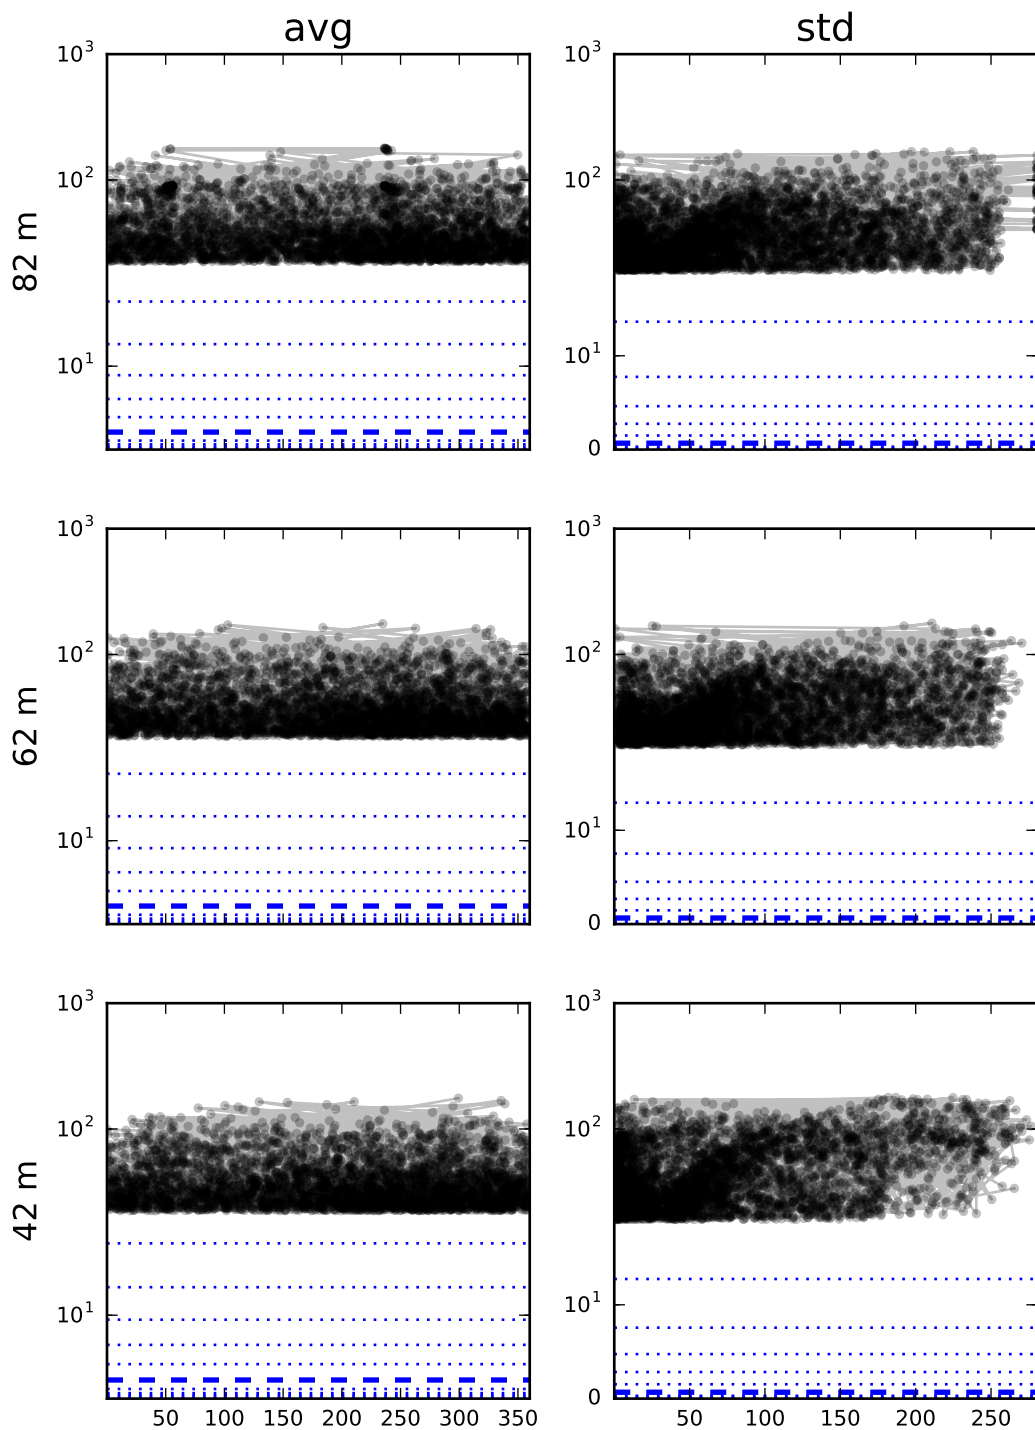

Supplement: Supplementary file 1 [file wes-2019-42-supplement.zip]

MMIJ pseudo/AirDensity (calculated air density, units: kg/m<sup>3</sup>)

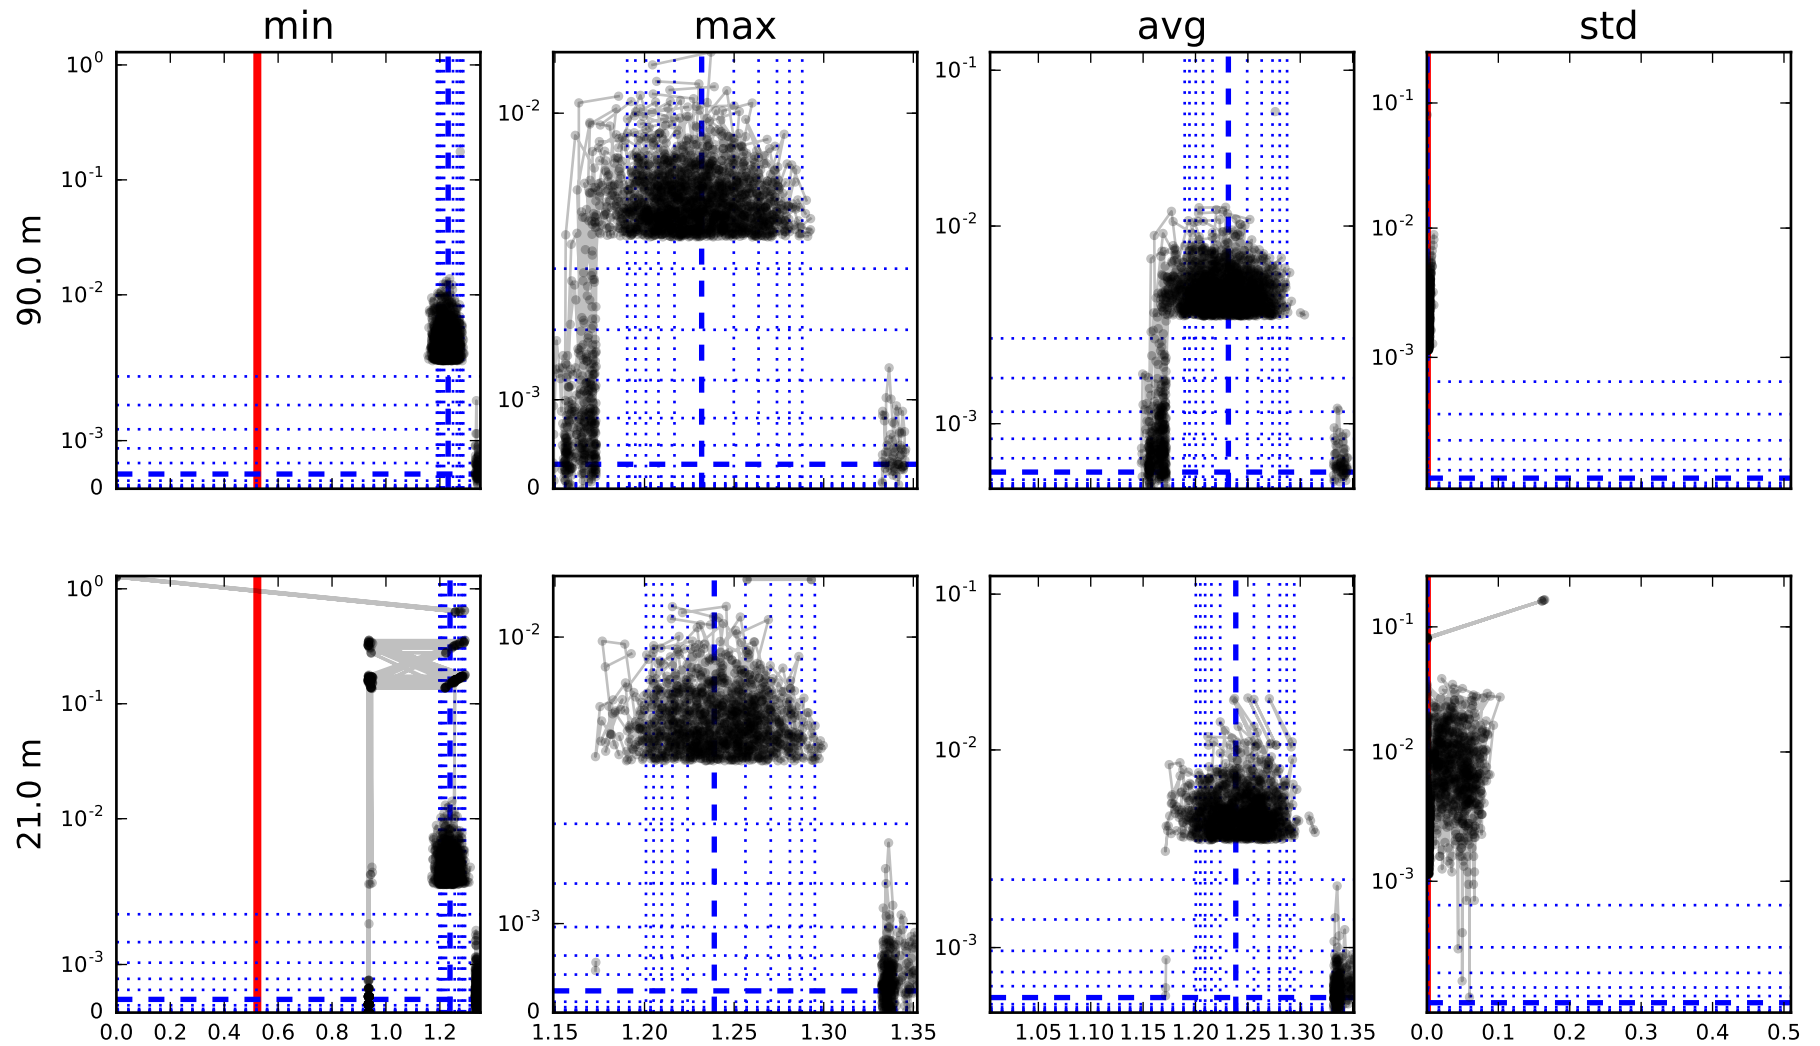

Supplement: Supplementary file 2 [file wes-2019-42-supplement.zip]

MMIJ USA/WsZSon (wind speed Z, units: m/s)

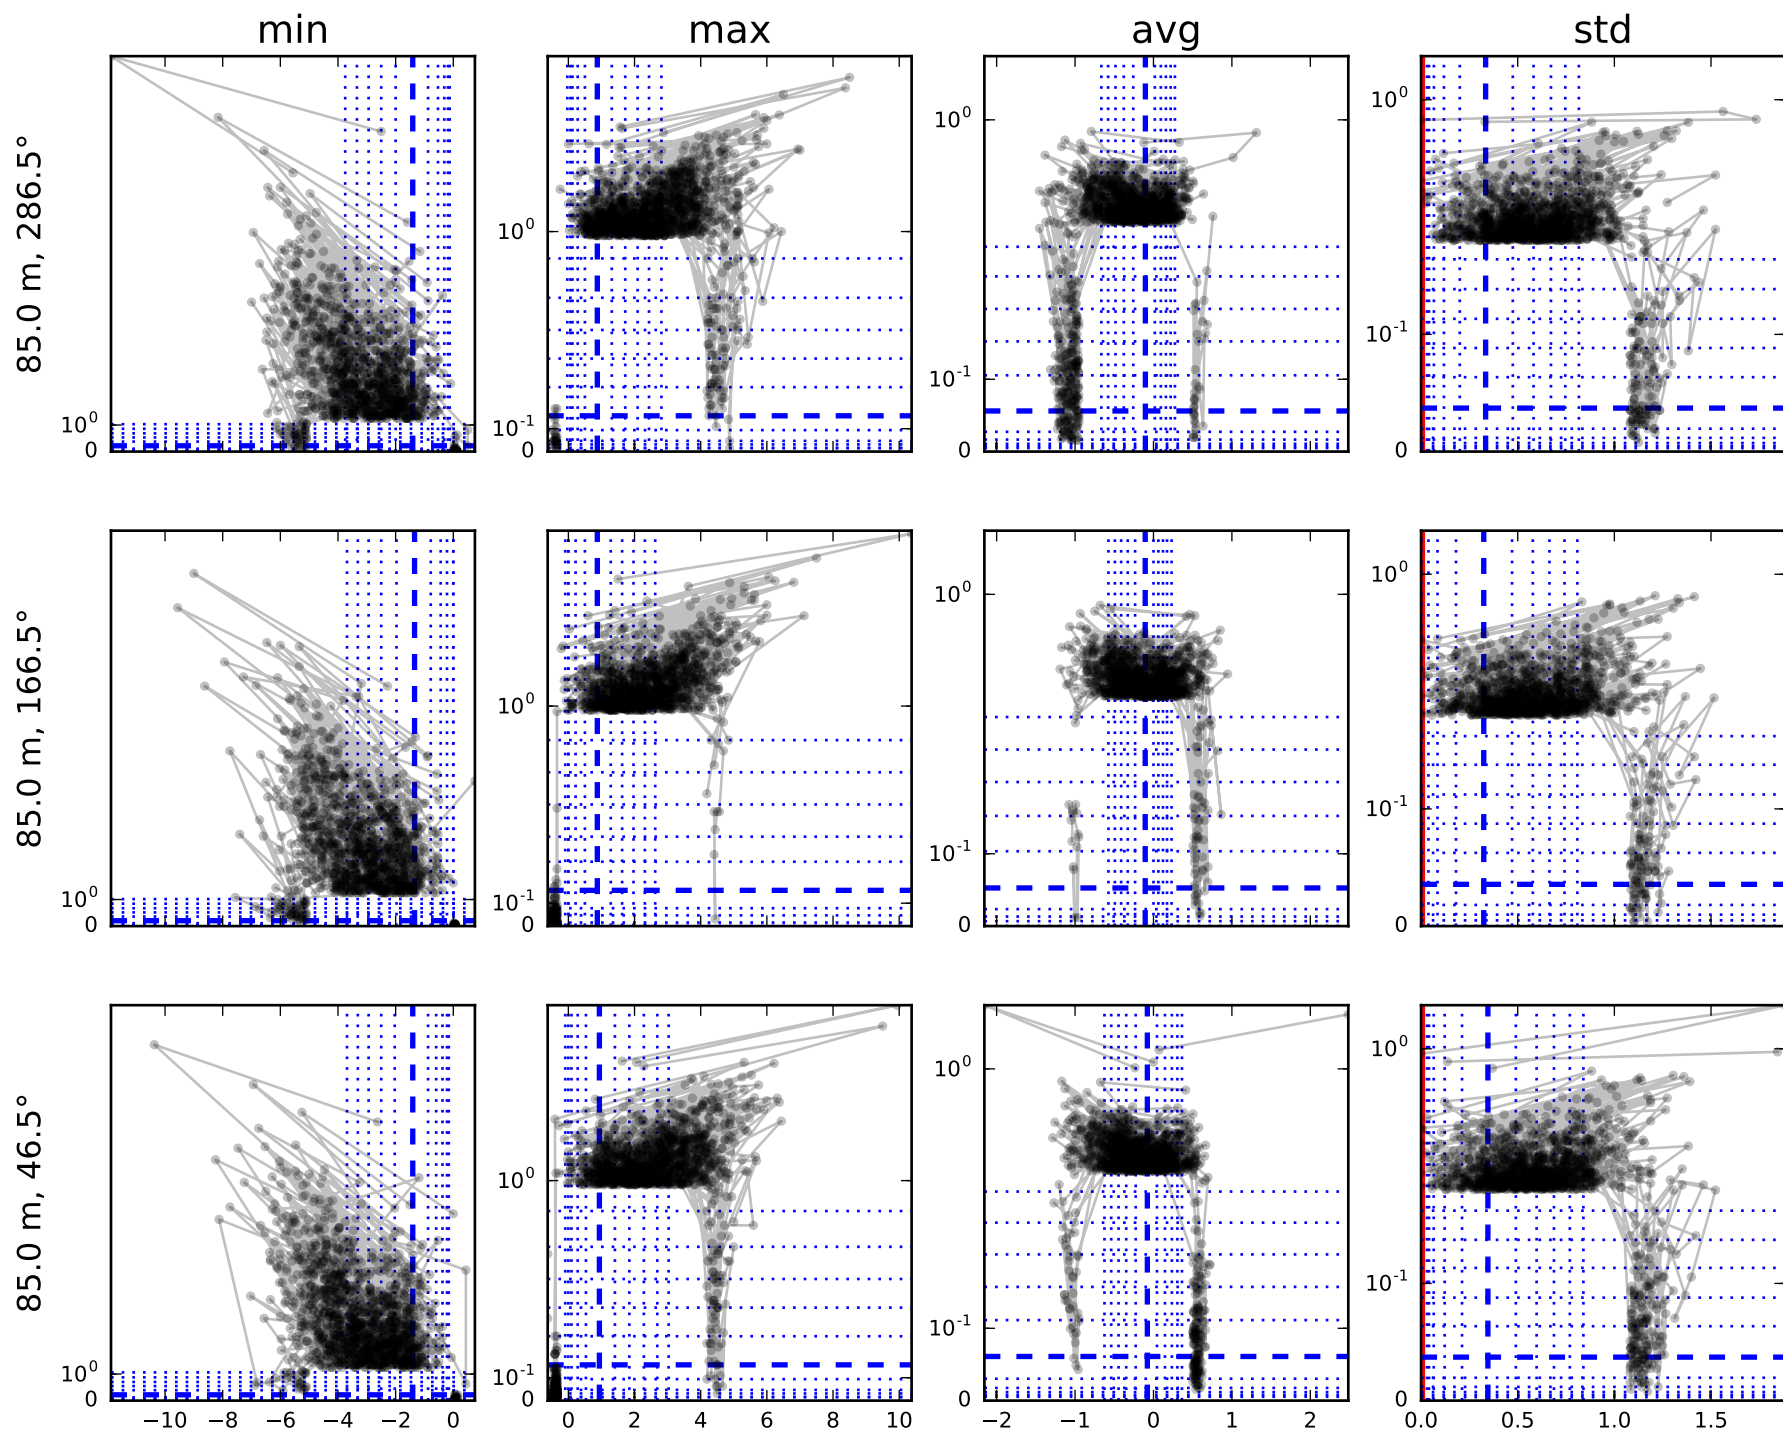

Supplement: Supplementary file 3 [file wes-2019-42-supplement.zip]

OWEZ HMP/rh (relative humidity, units: %)

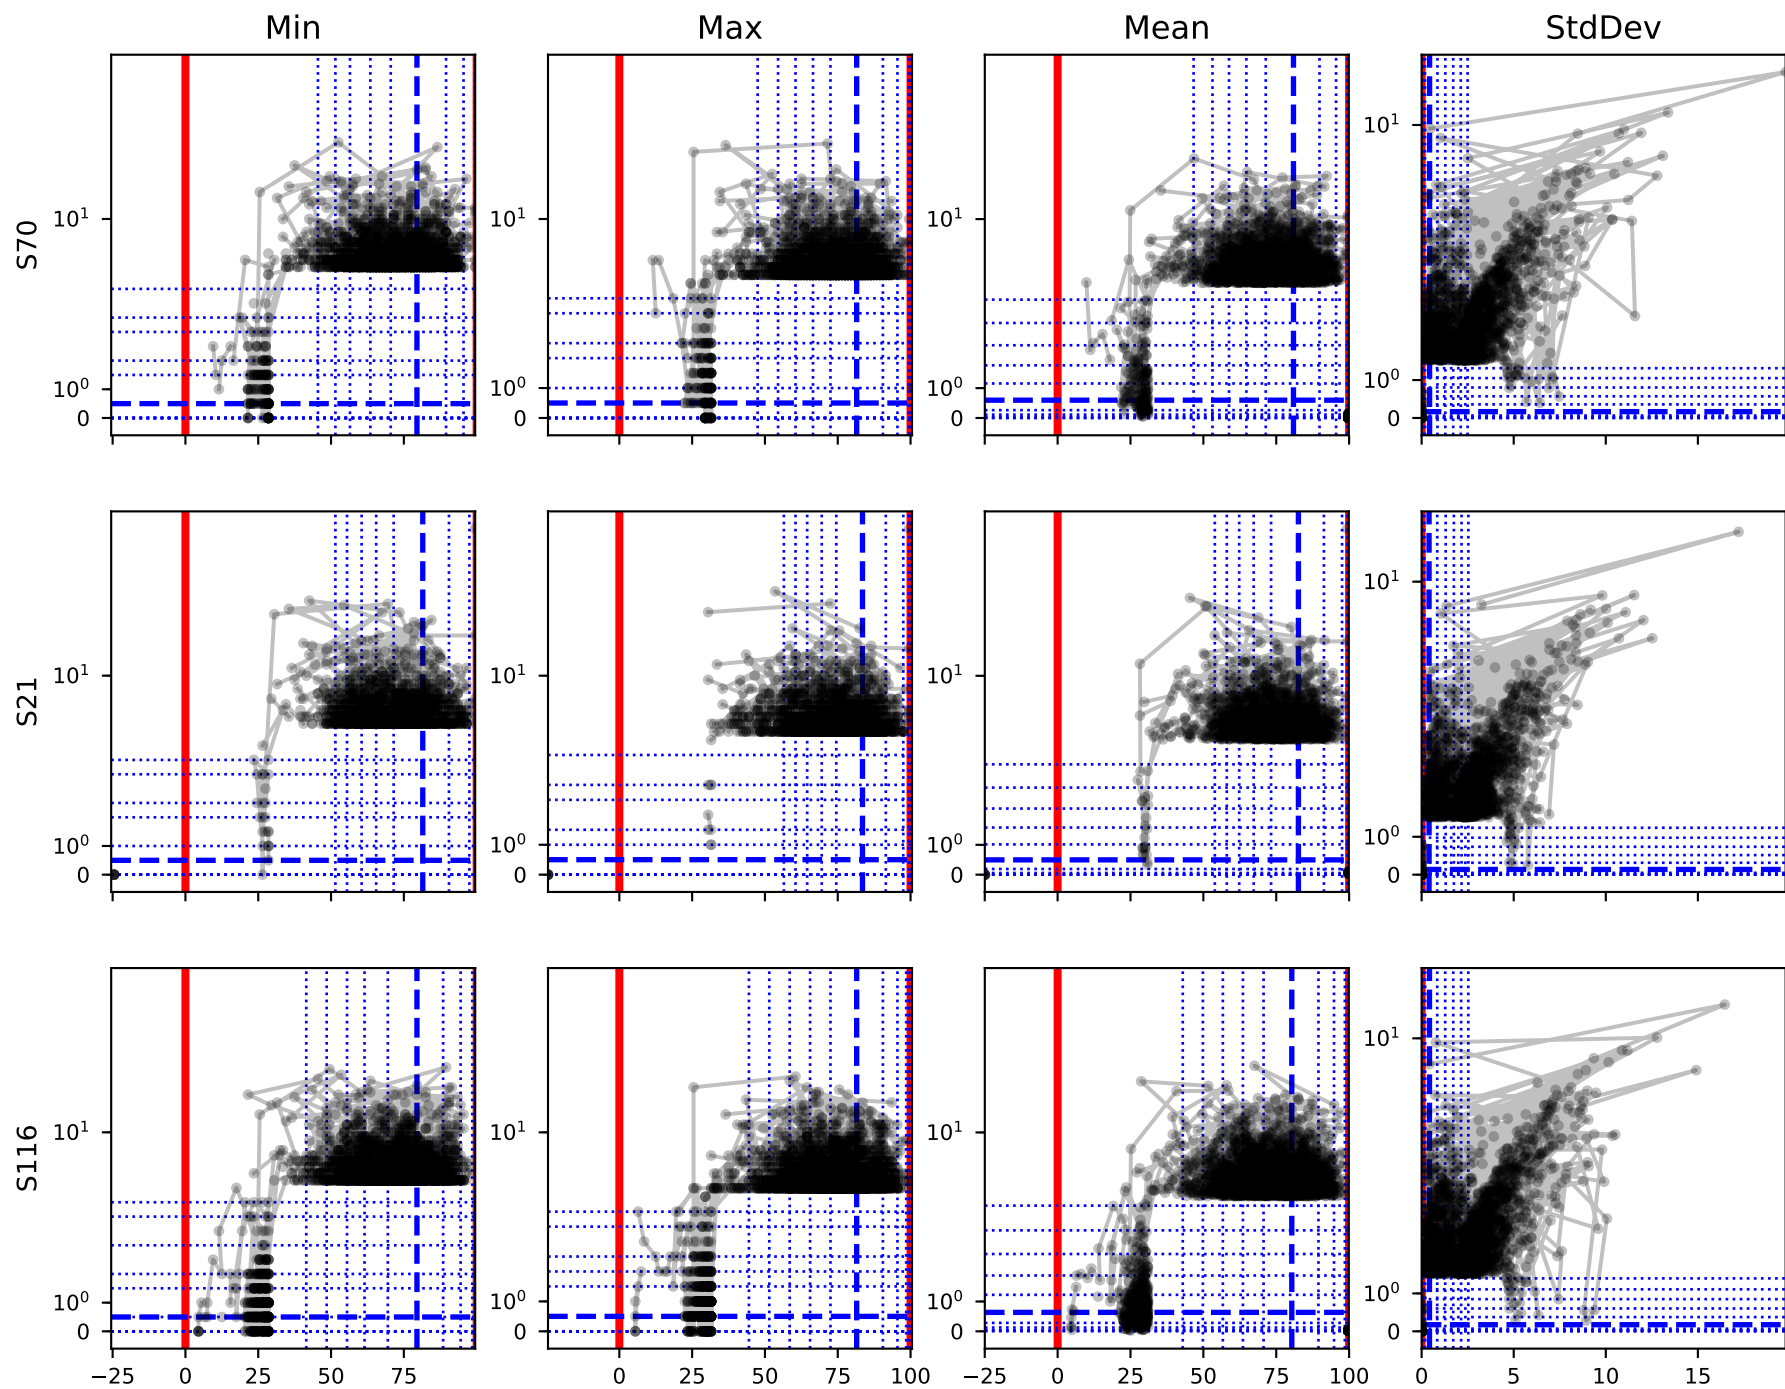

Supplement: Supplementary file 4 [file wes-2019-42-supplement.zip]

FINO1 CA/Wg (wind speed, units: m/s)

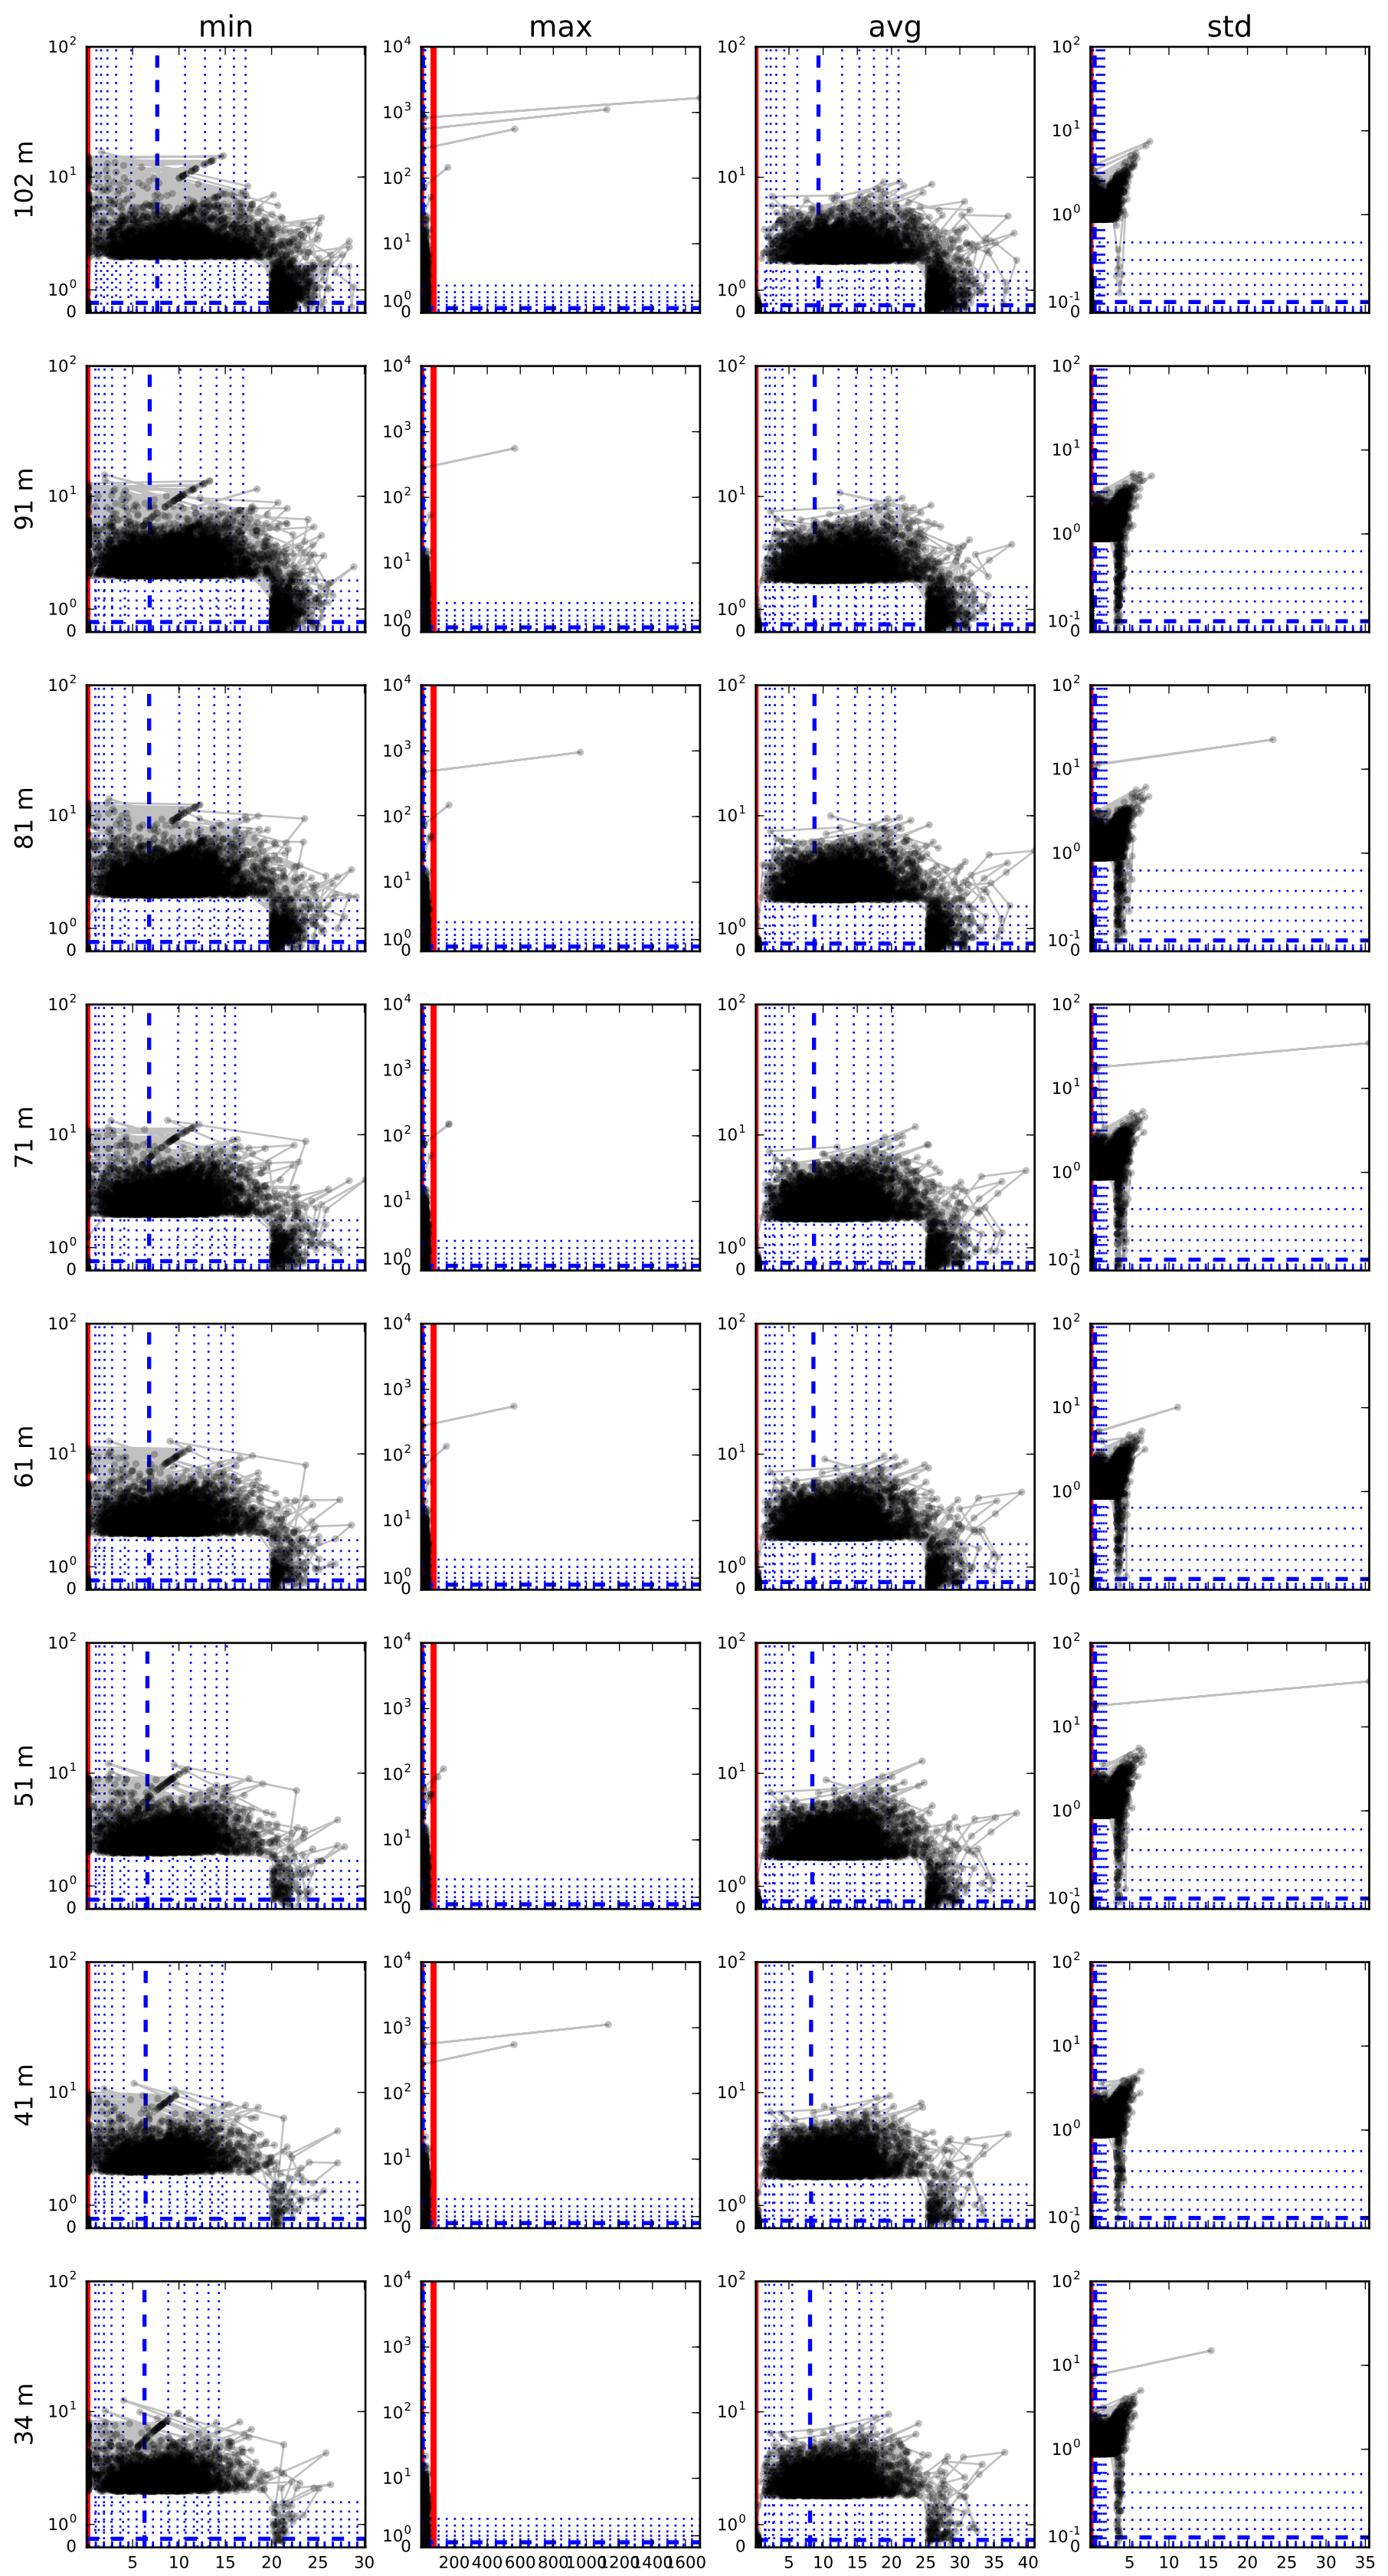

Supplement: Supplementary file 5 [file wes-2019-42-supplement.zip]

OWEZ WM/wd (wind direction, units: °)

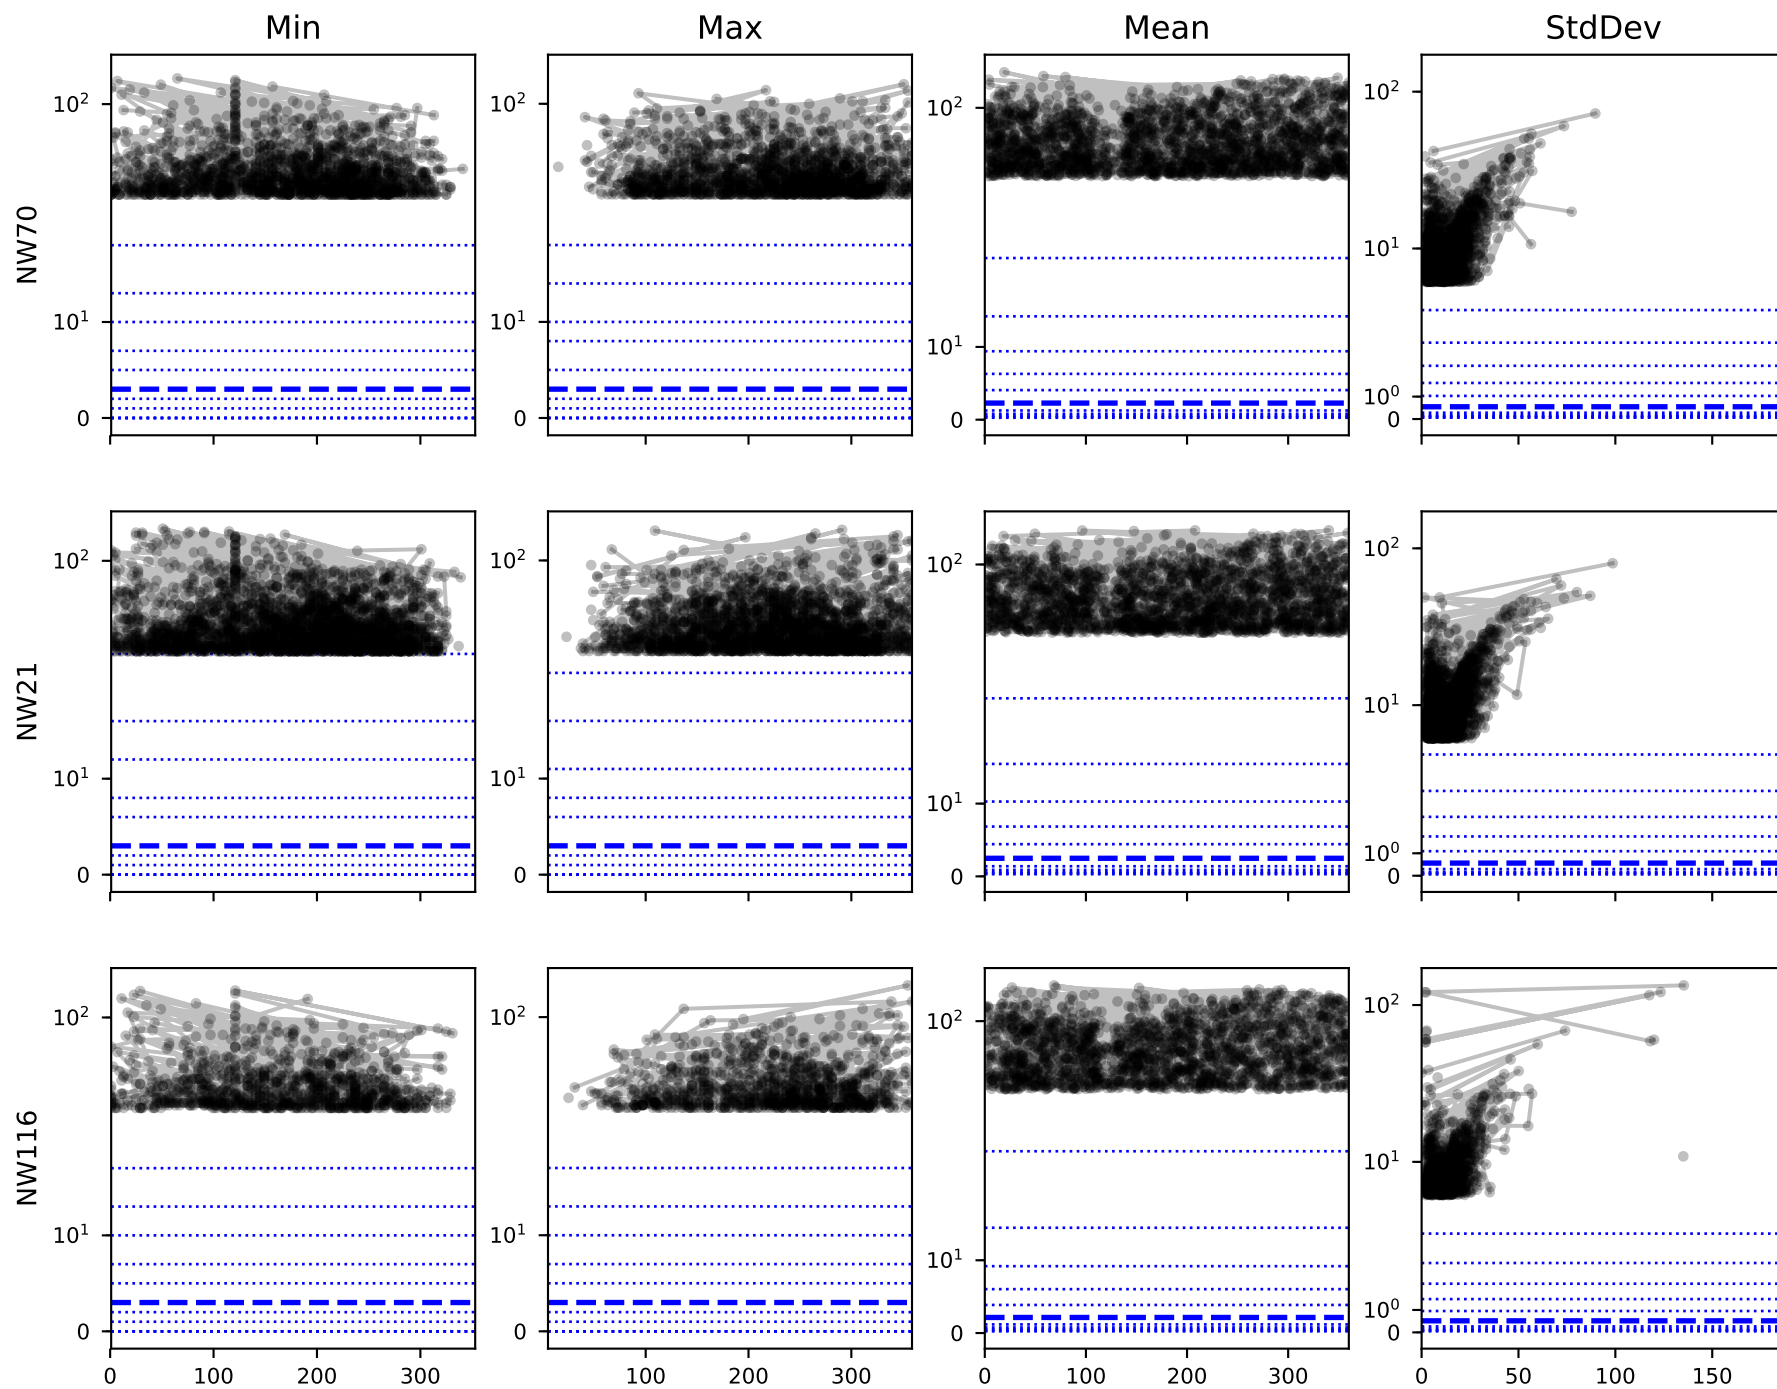

Supplement: Supplementary file 6 [file wes-2019-42-supplement.zip]

MMIJ PM/amount (amount of precipitation since the last sensor reset, units: mm)

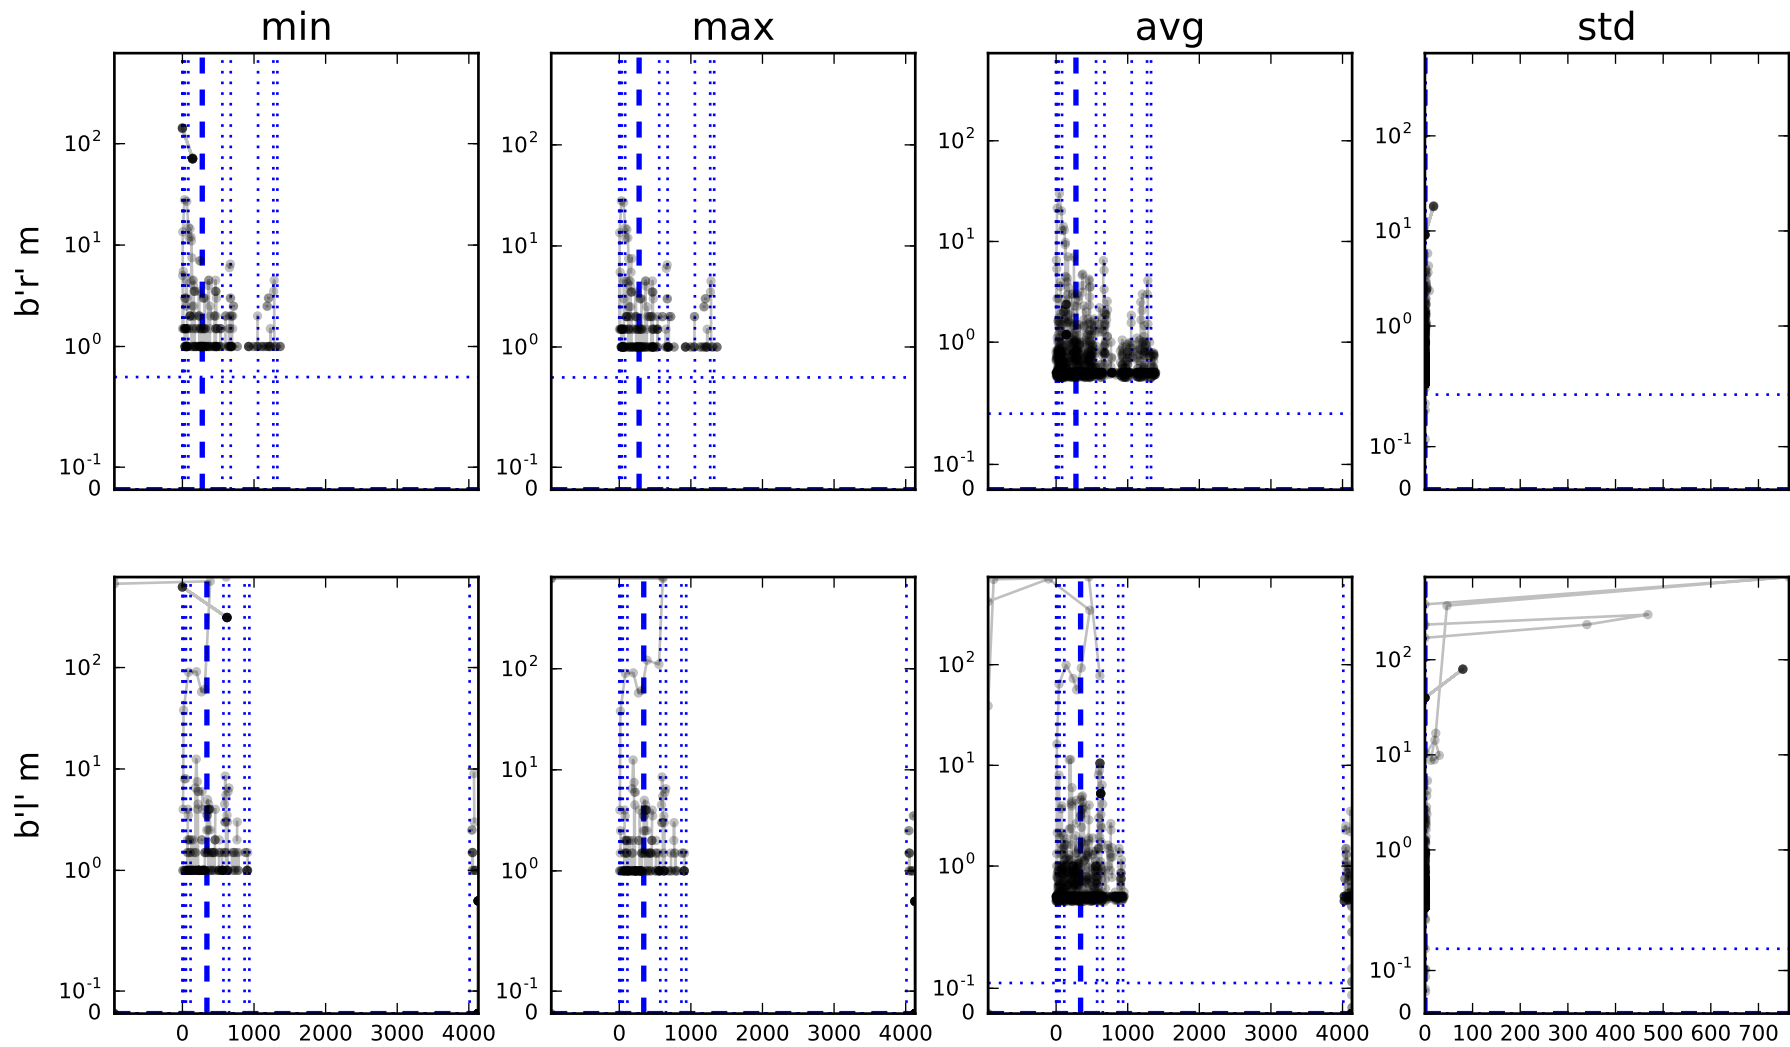

Supplement: Supplementary file 7 [file wes-2019-42-supplement.zip]

MMIJ USA/WsMag (calculated wind speed magnitude, units: m/s)

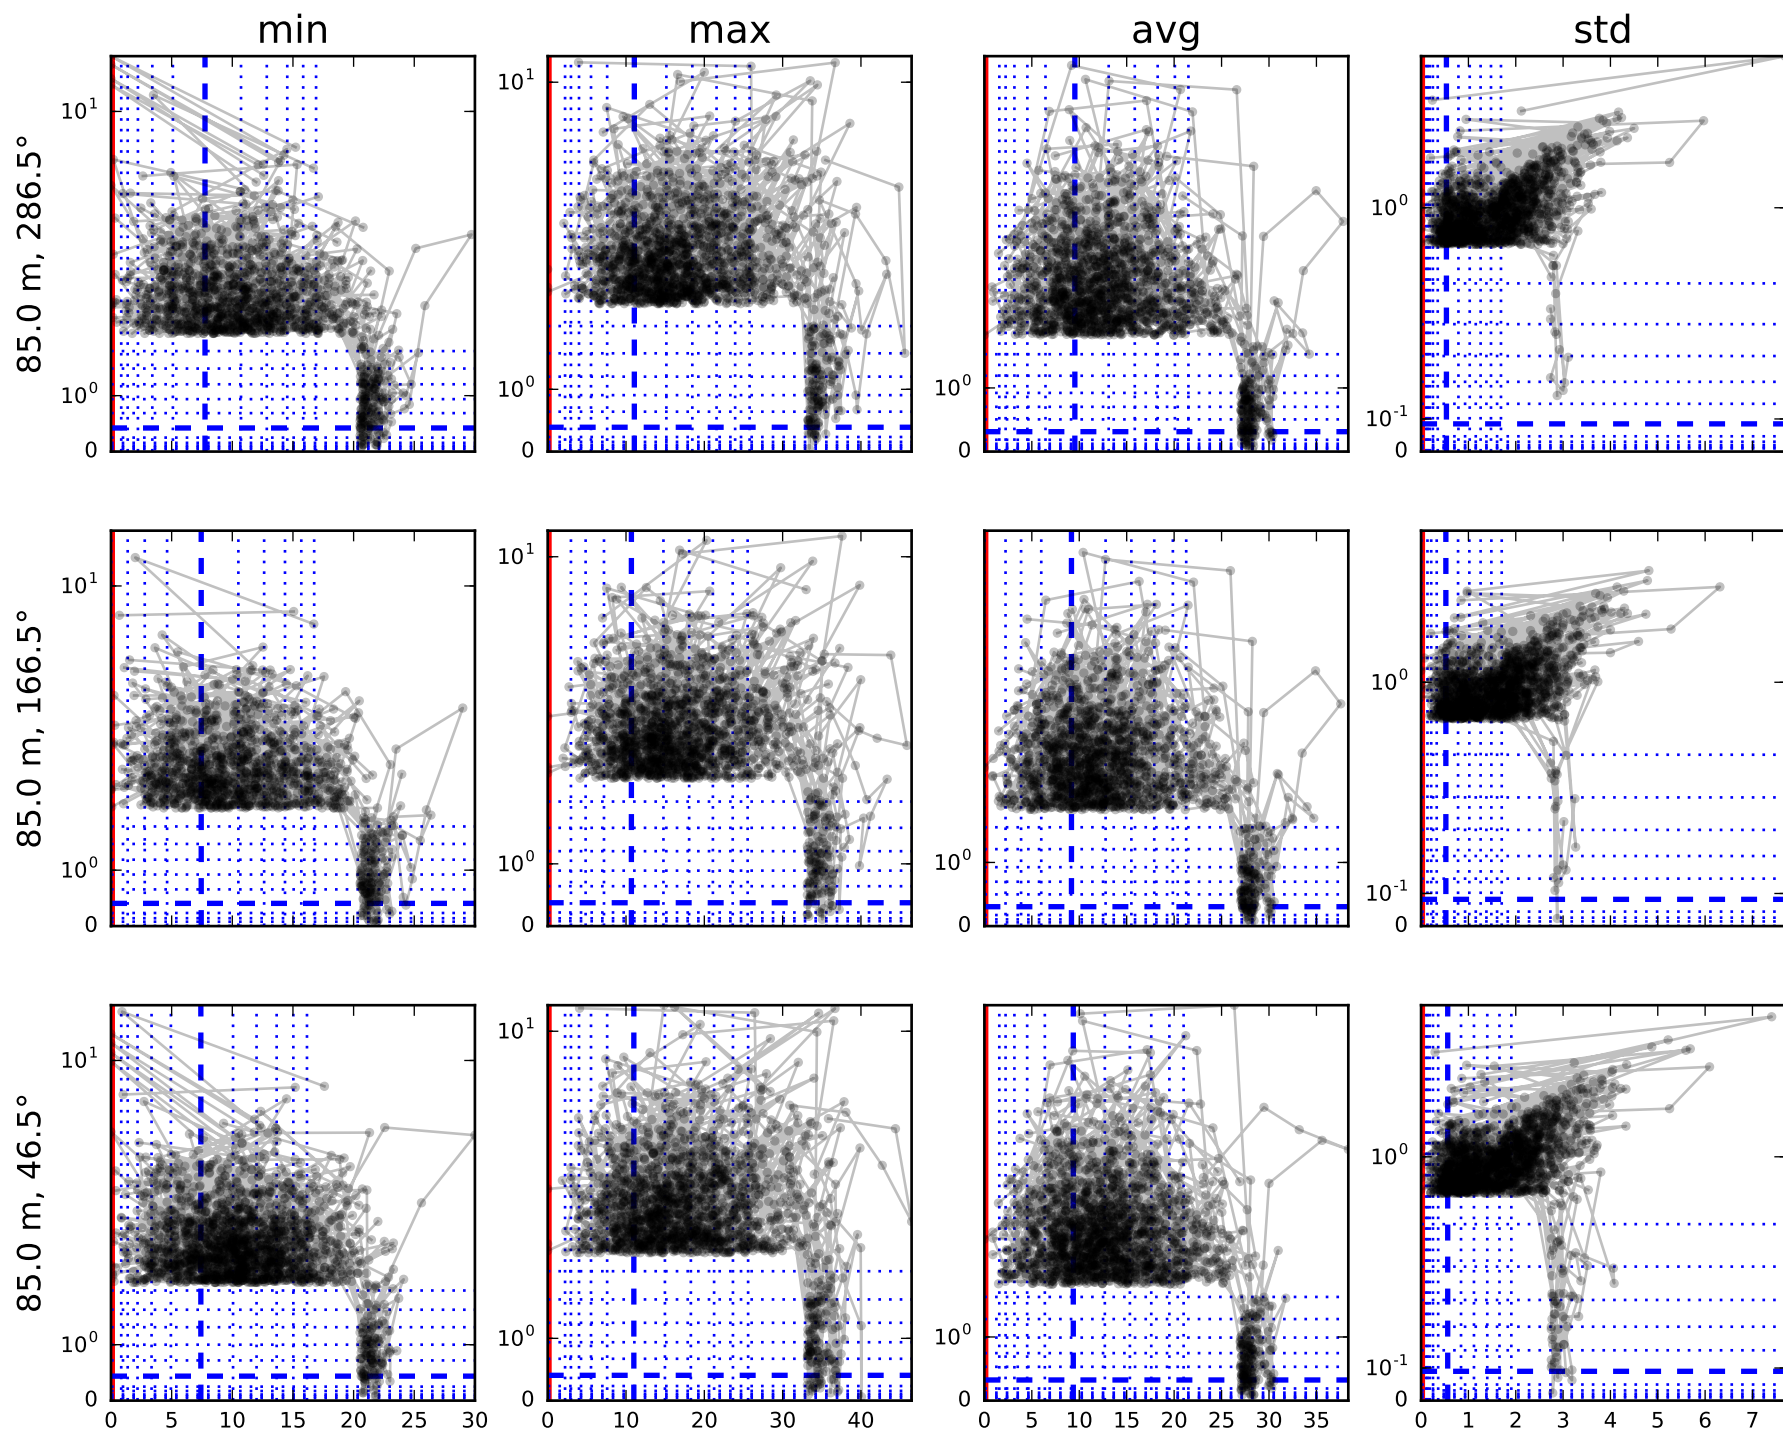

Supplement: Supplementary file 8 [file wes-2019-42-supplement.zip]

FINO1 UA/Wg (wind speed, units: m/s)

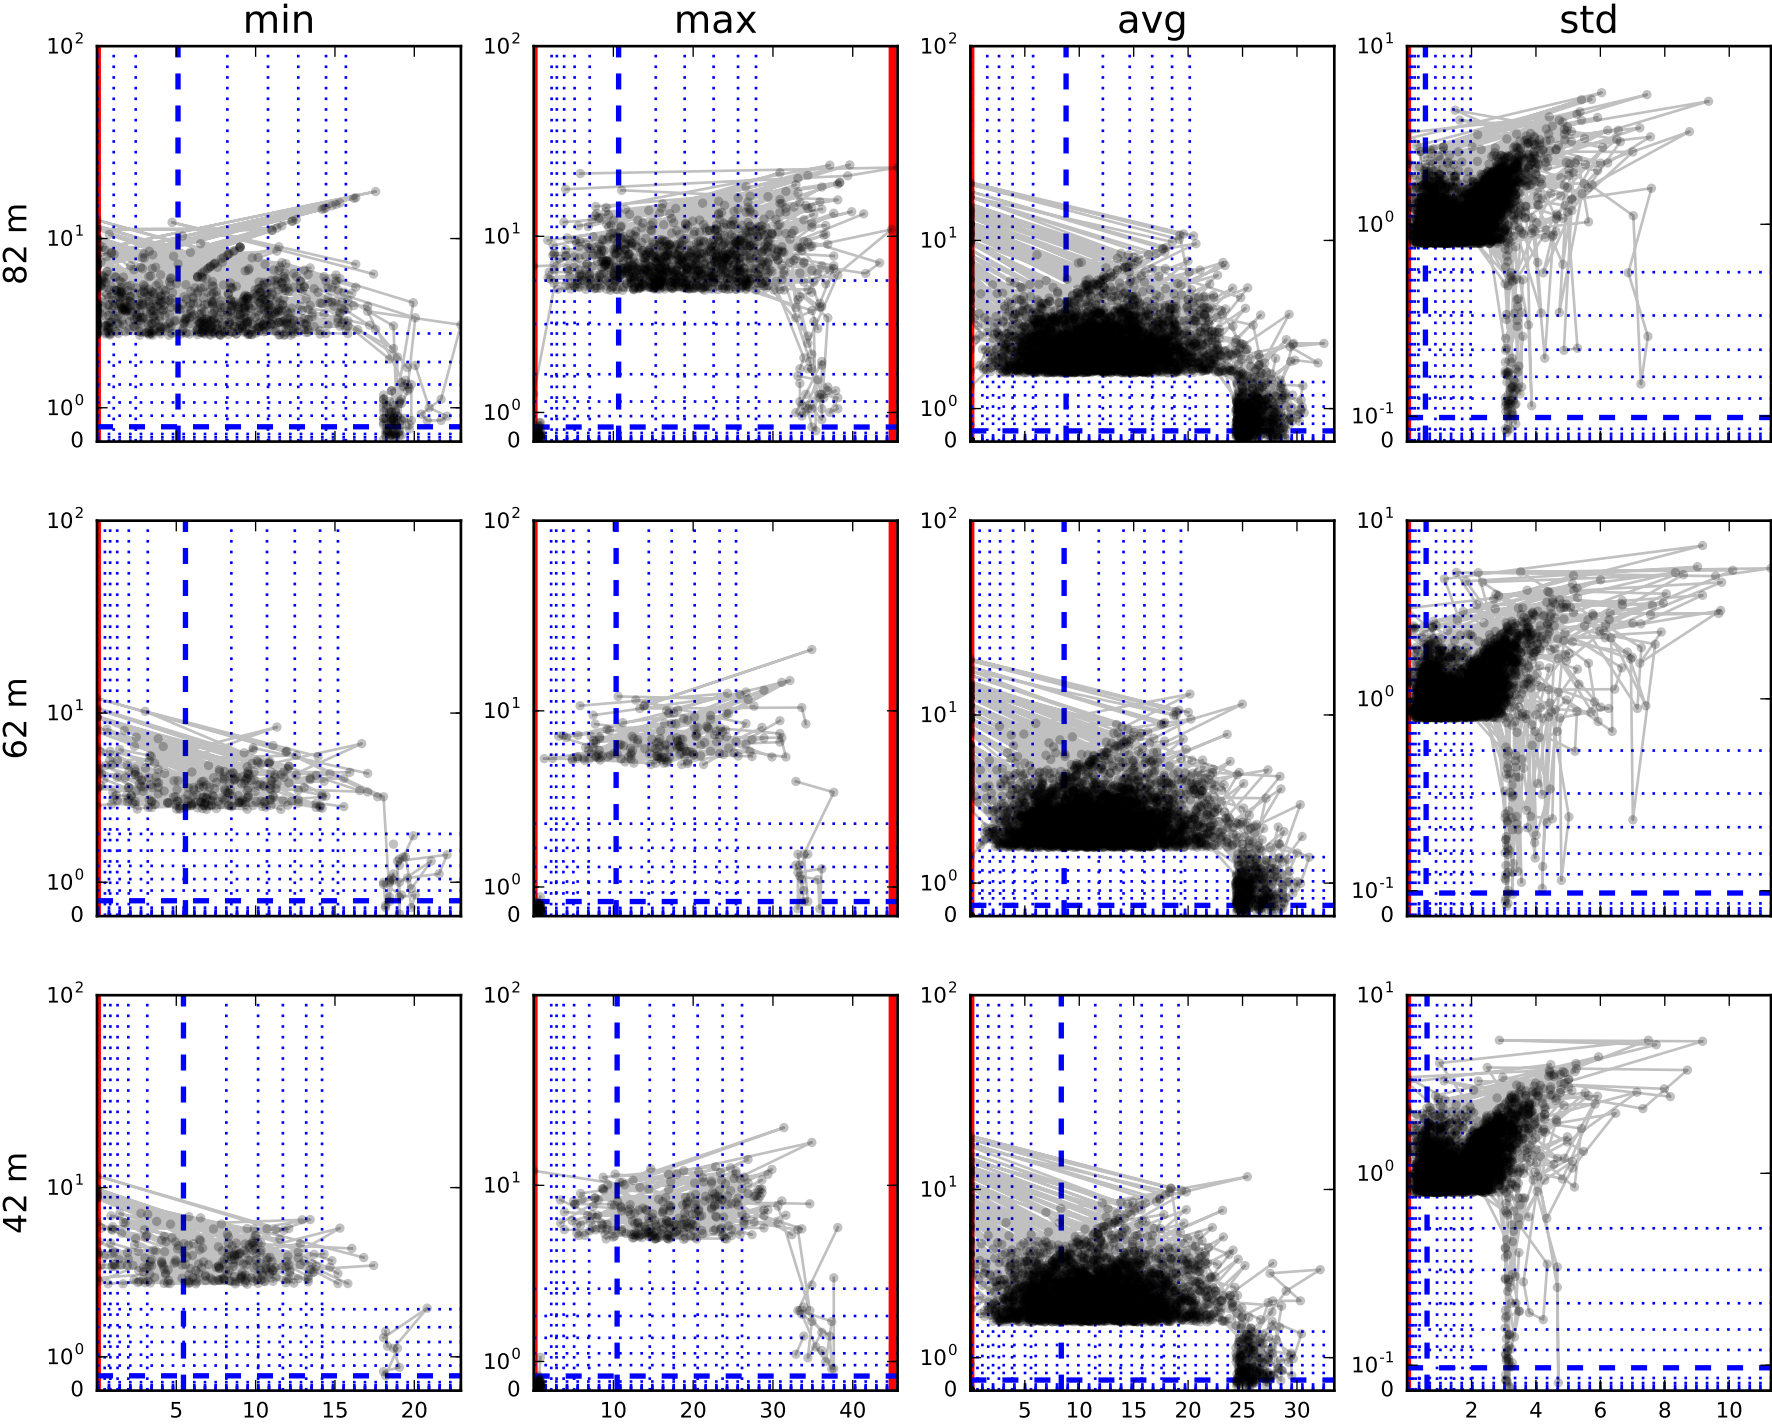

Supplement: Supplementary file 9 [file wes-2019-42-supplement.zip]

OWEZ AWAC/wl (water level, units: m)

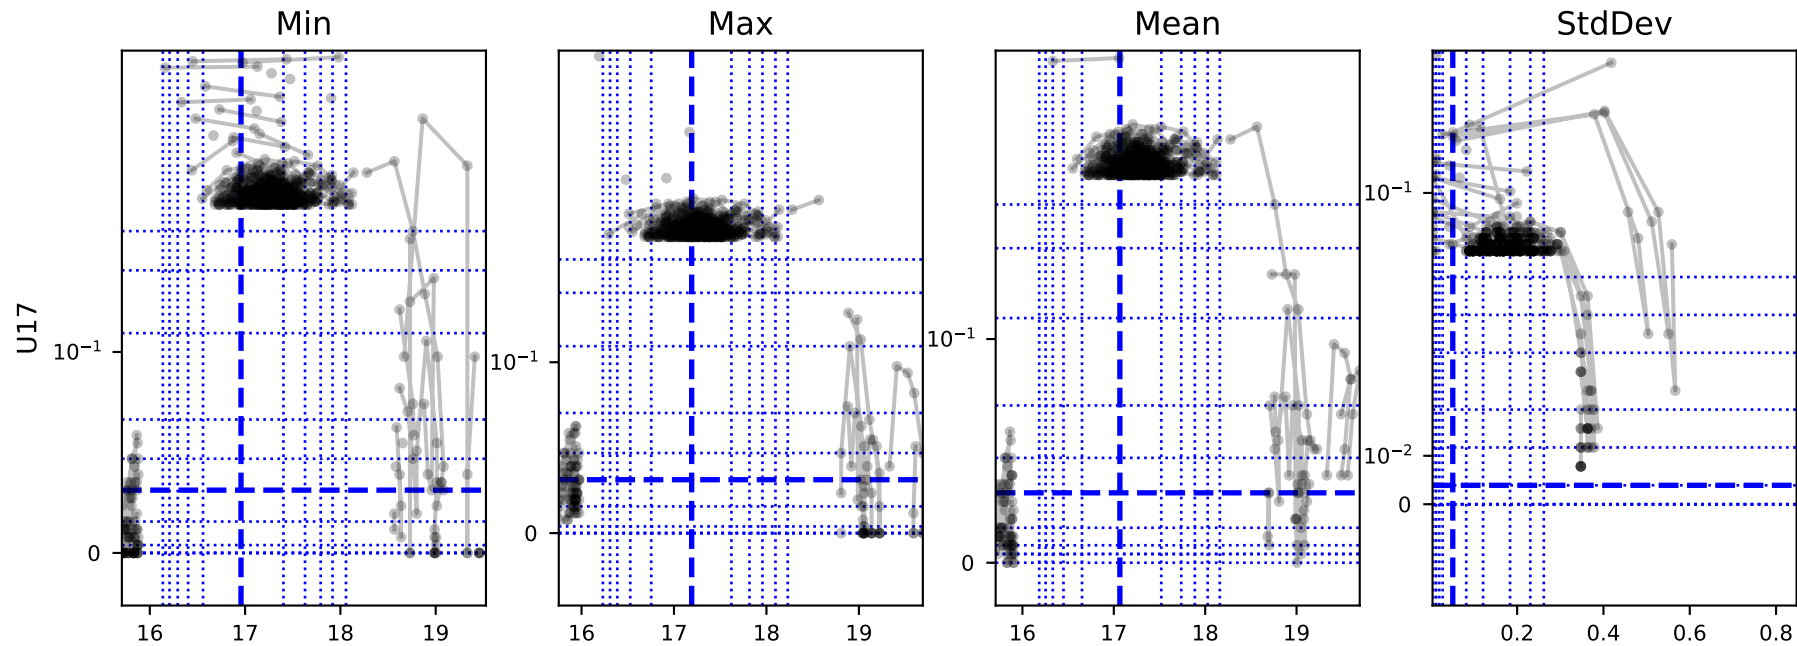

Supplement: Supplementary file 10 [file wes-2019-42-supplement.zip]

FINO1 PM/Ns (precipitation presence)

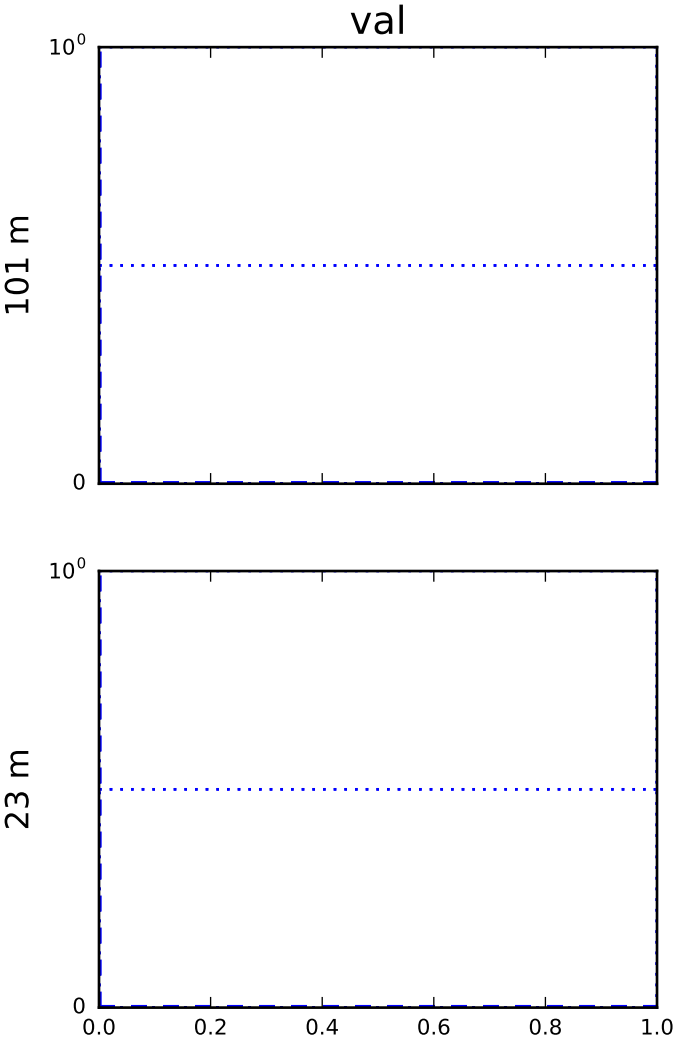

Supplement: Supplementary file 11 [file wes-2019-42-supplement.zip]

FINO1 PTB/Ld (air pressure, units: hPa)

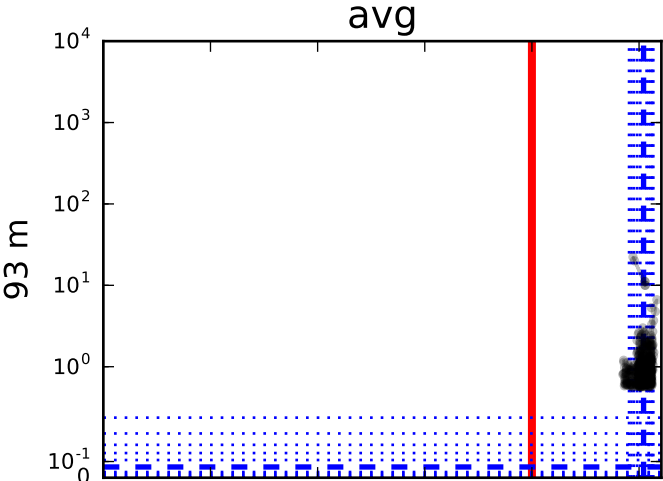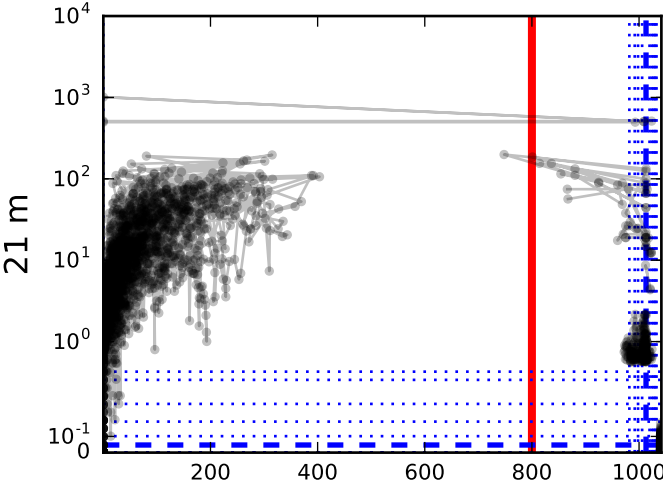

Supplement: Supplementary file 12 [file wes-2019-42-supplement.zip]

MMIJ PM/intens (intensity of precipitation, units: mm/min)

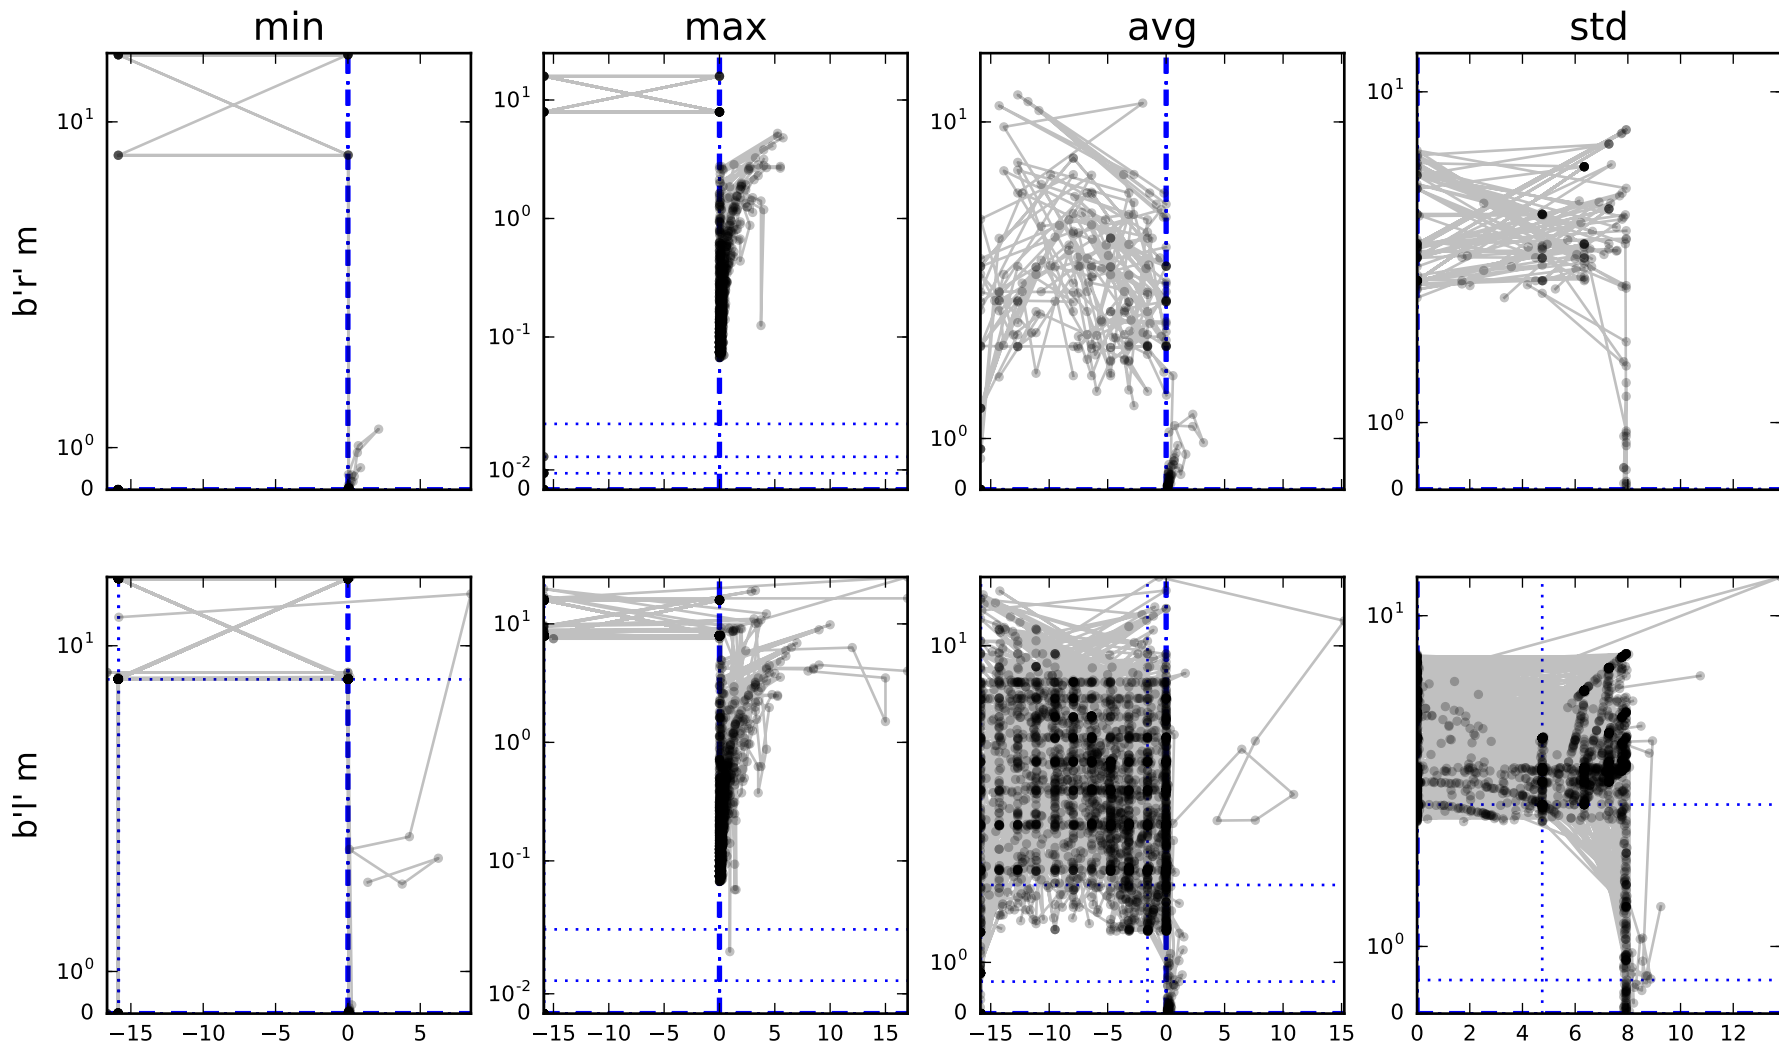

Supplement: Supplementary file 13 [file wes-2019-42-supplement.zip]

OWEZ RPT/ap (ambient air pressure, units: mbar)

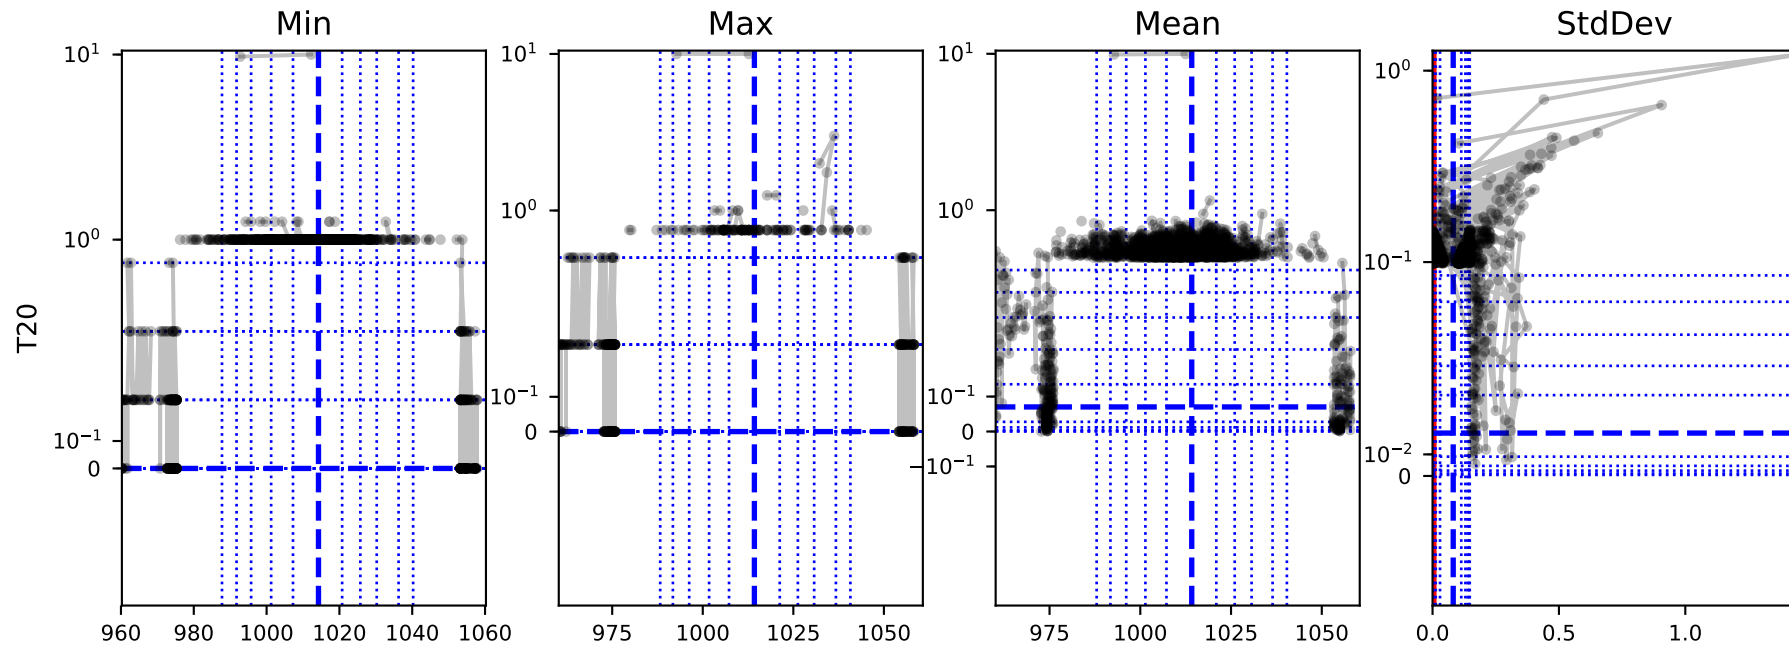

Supplement: Supplementary file 14 [file wes-2019-42-supplement.zip]

MMIJ USA/TrueWsHor (tower shadow-corrected wind speed, units: m/s)

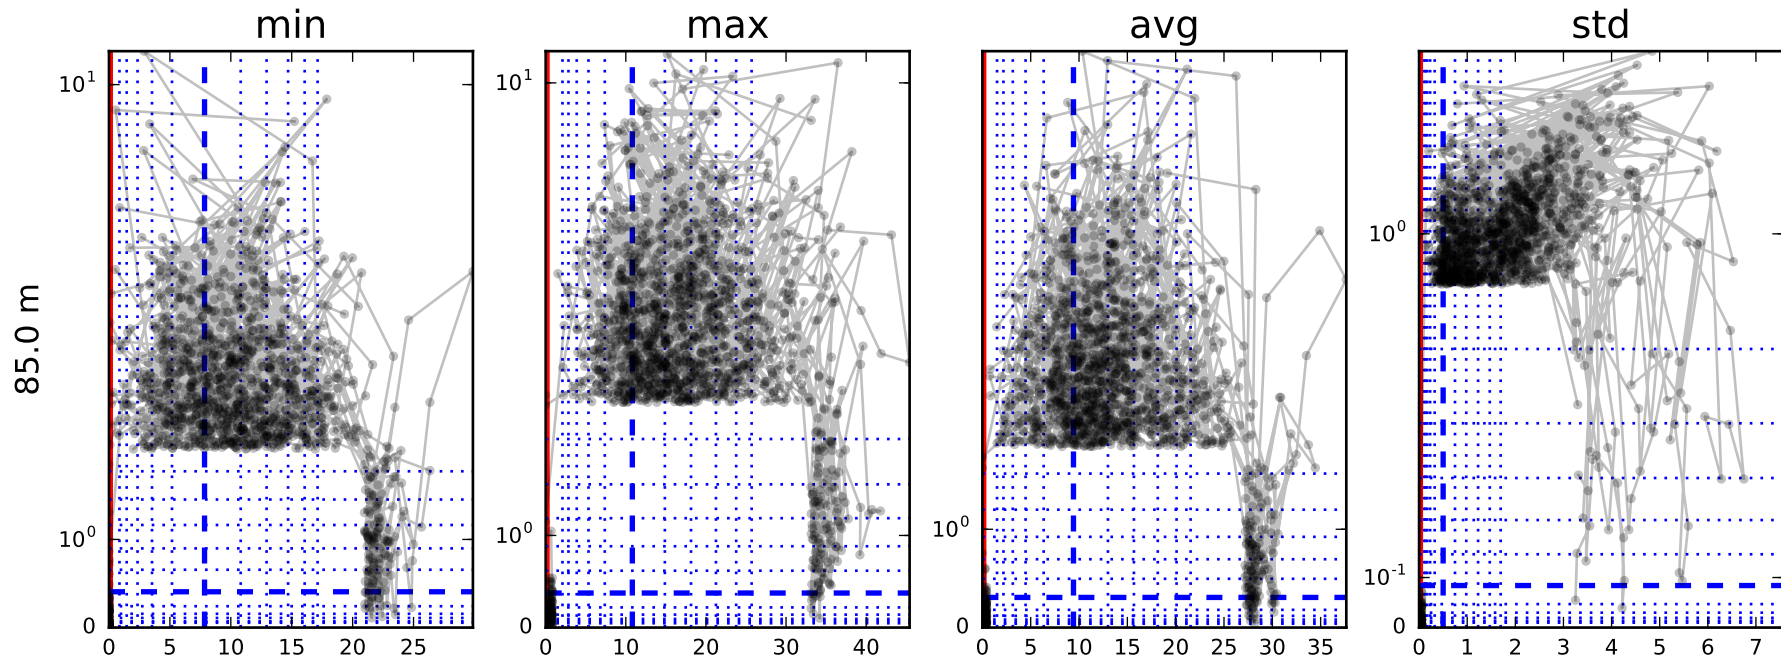

Supplement: Supplementary file 15 [file wes-2019-42-supplement.zip]

OWEZ AWAC/cd7 (current direction 7 m, units: °)

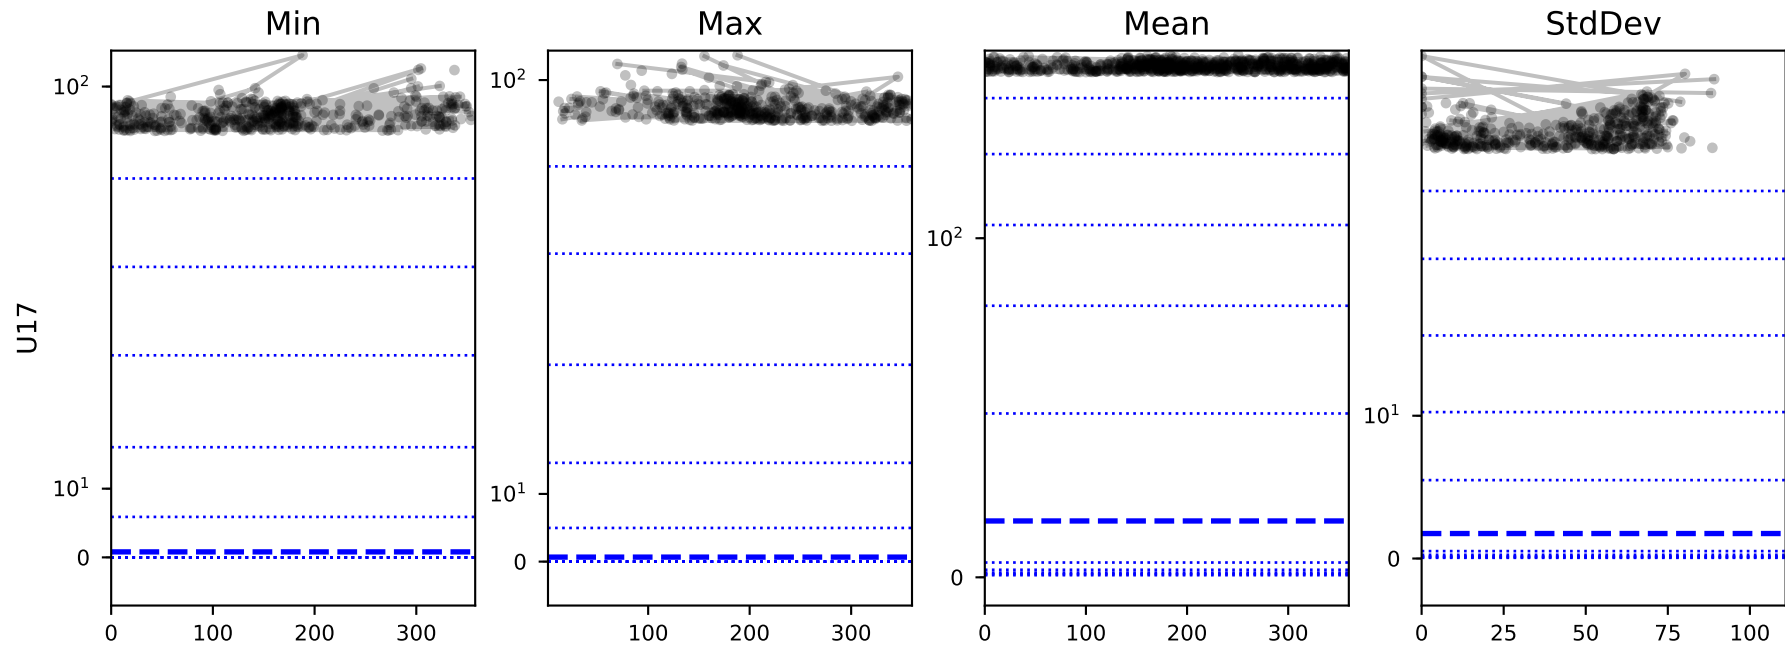

Supplement: Supplementary file 16 [file wes-2019-42-supplement.zip]

# MMIJ PM/Prec (precipitation presence)

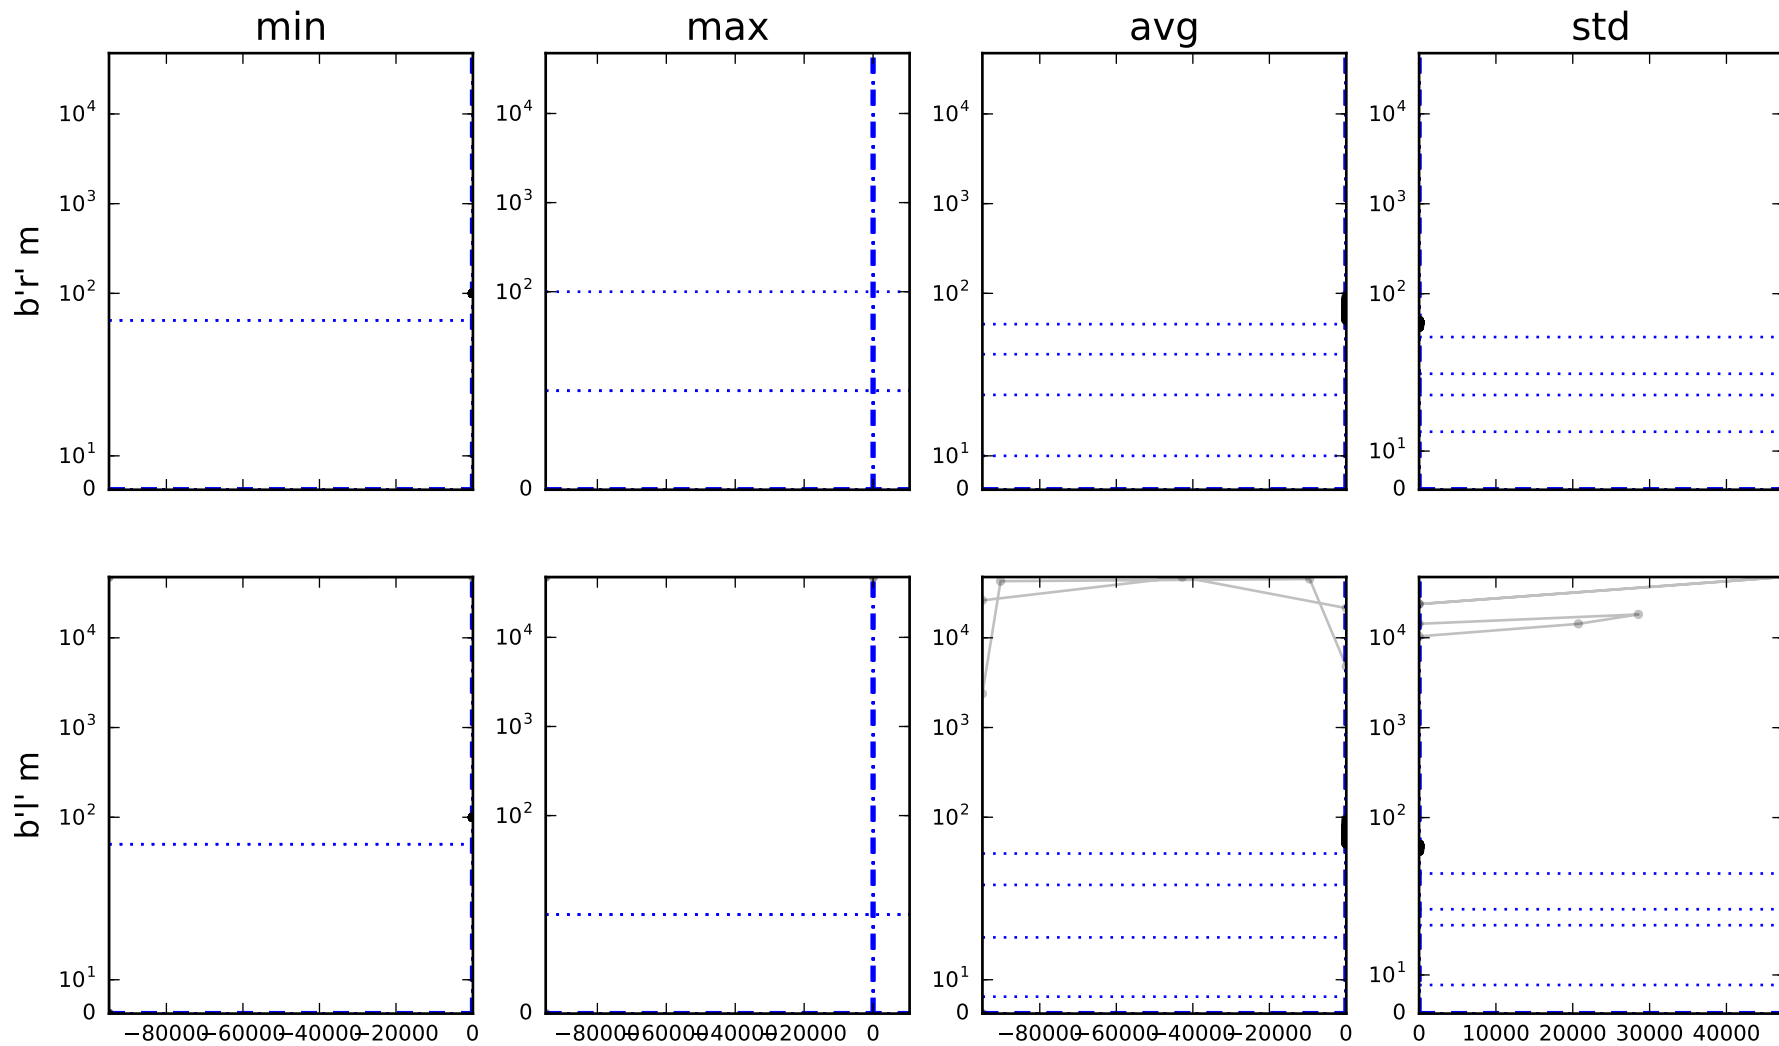

Supplement: Supplementary file 17 [file wes-2019-42-supplement.zip]

MMIJ PM/Synop (synoptic code (ww 4677), specifies the kind of precipitation, if any)

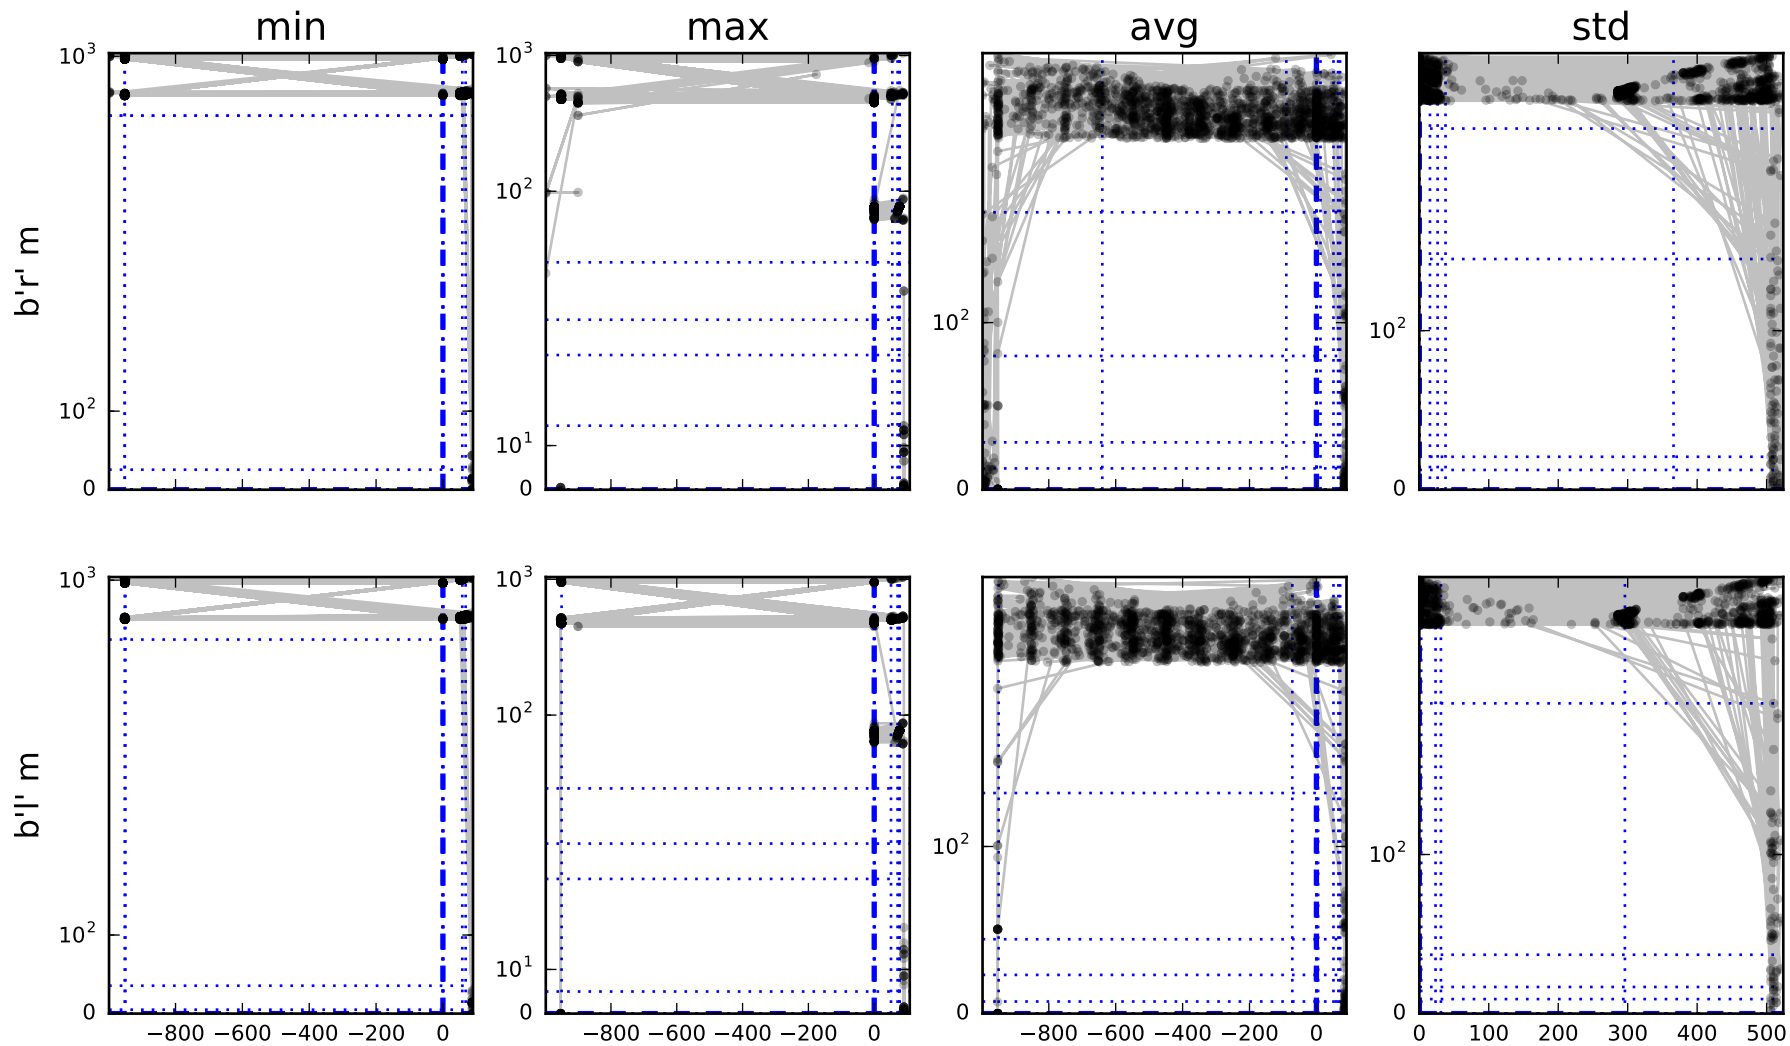

Supplement: Supplementary file 18 [file wes-2019-42-supplement.zip]

OWEZ AC/pa (West-East acceleration, units:  $\text{m/s}^2$ )

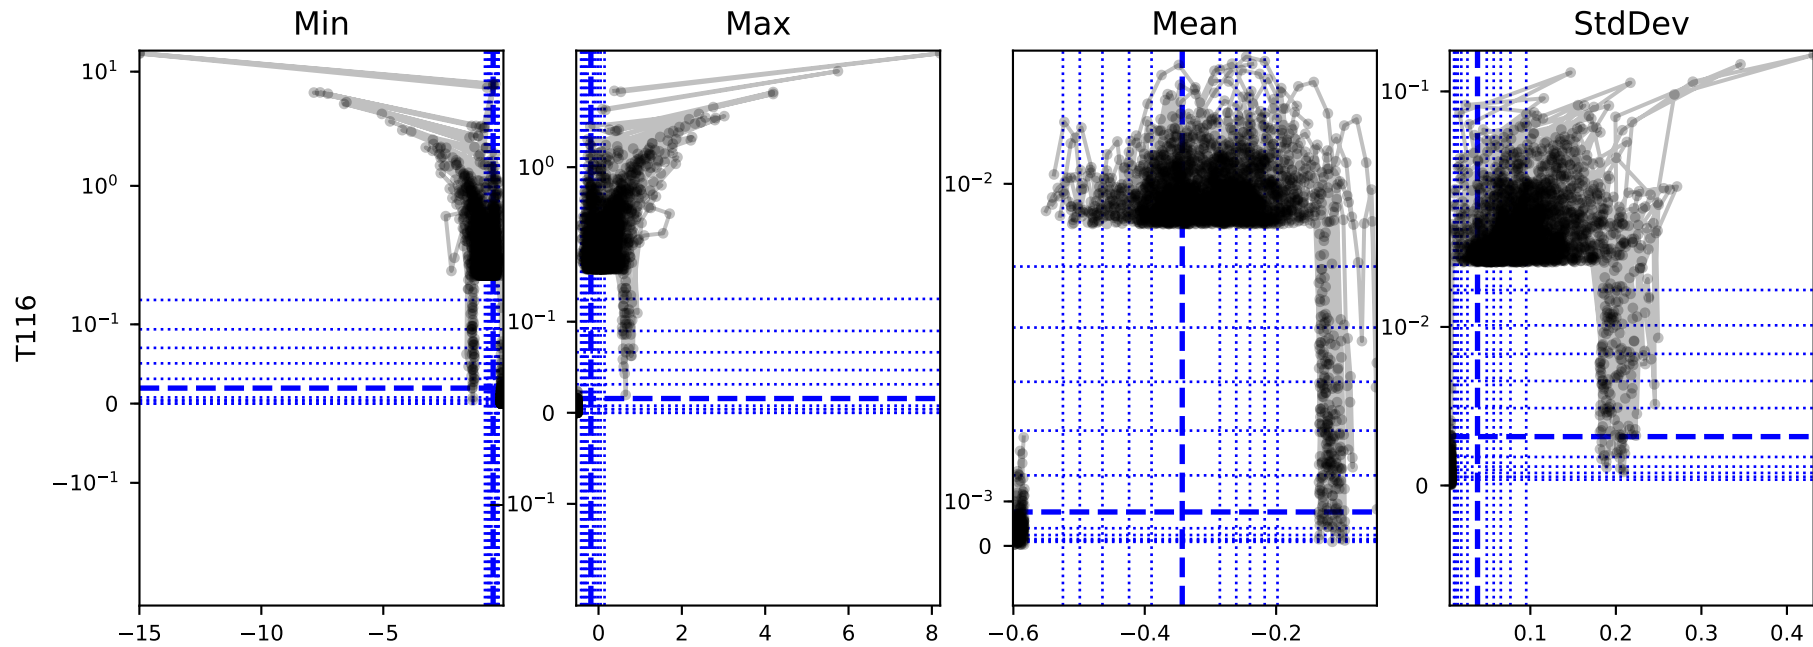

Supplement: Supplementary file 19 [file wes-2019-42-supplement.zip]

FINO1 WV/Wr (wind direction, units: °)

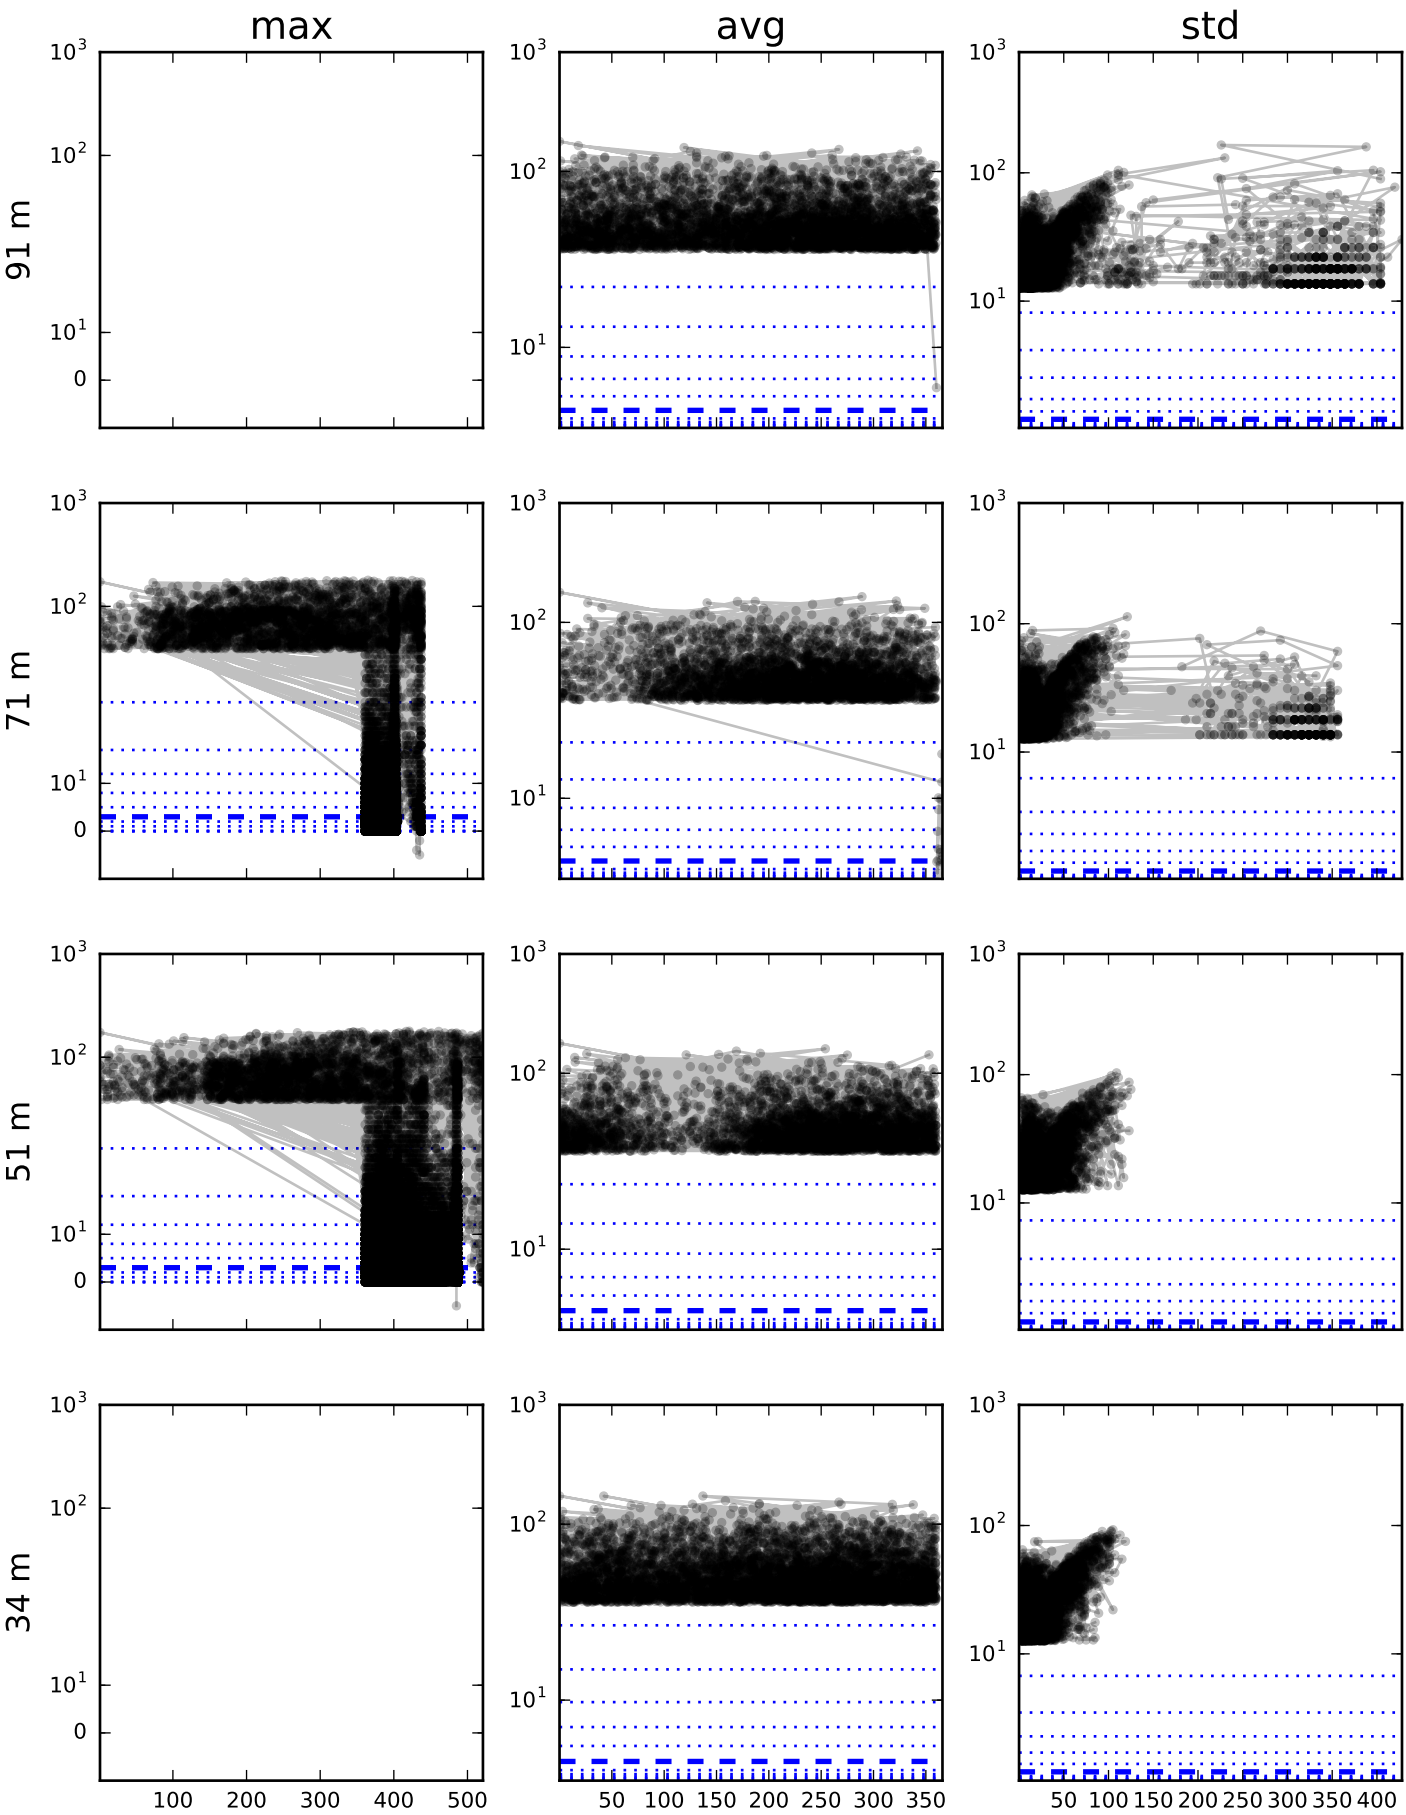

Supplement: Supplementary file 20 [file wes-2019-42-supplement.zip]

# MMIJ USA/SSon (sonic status)

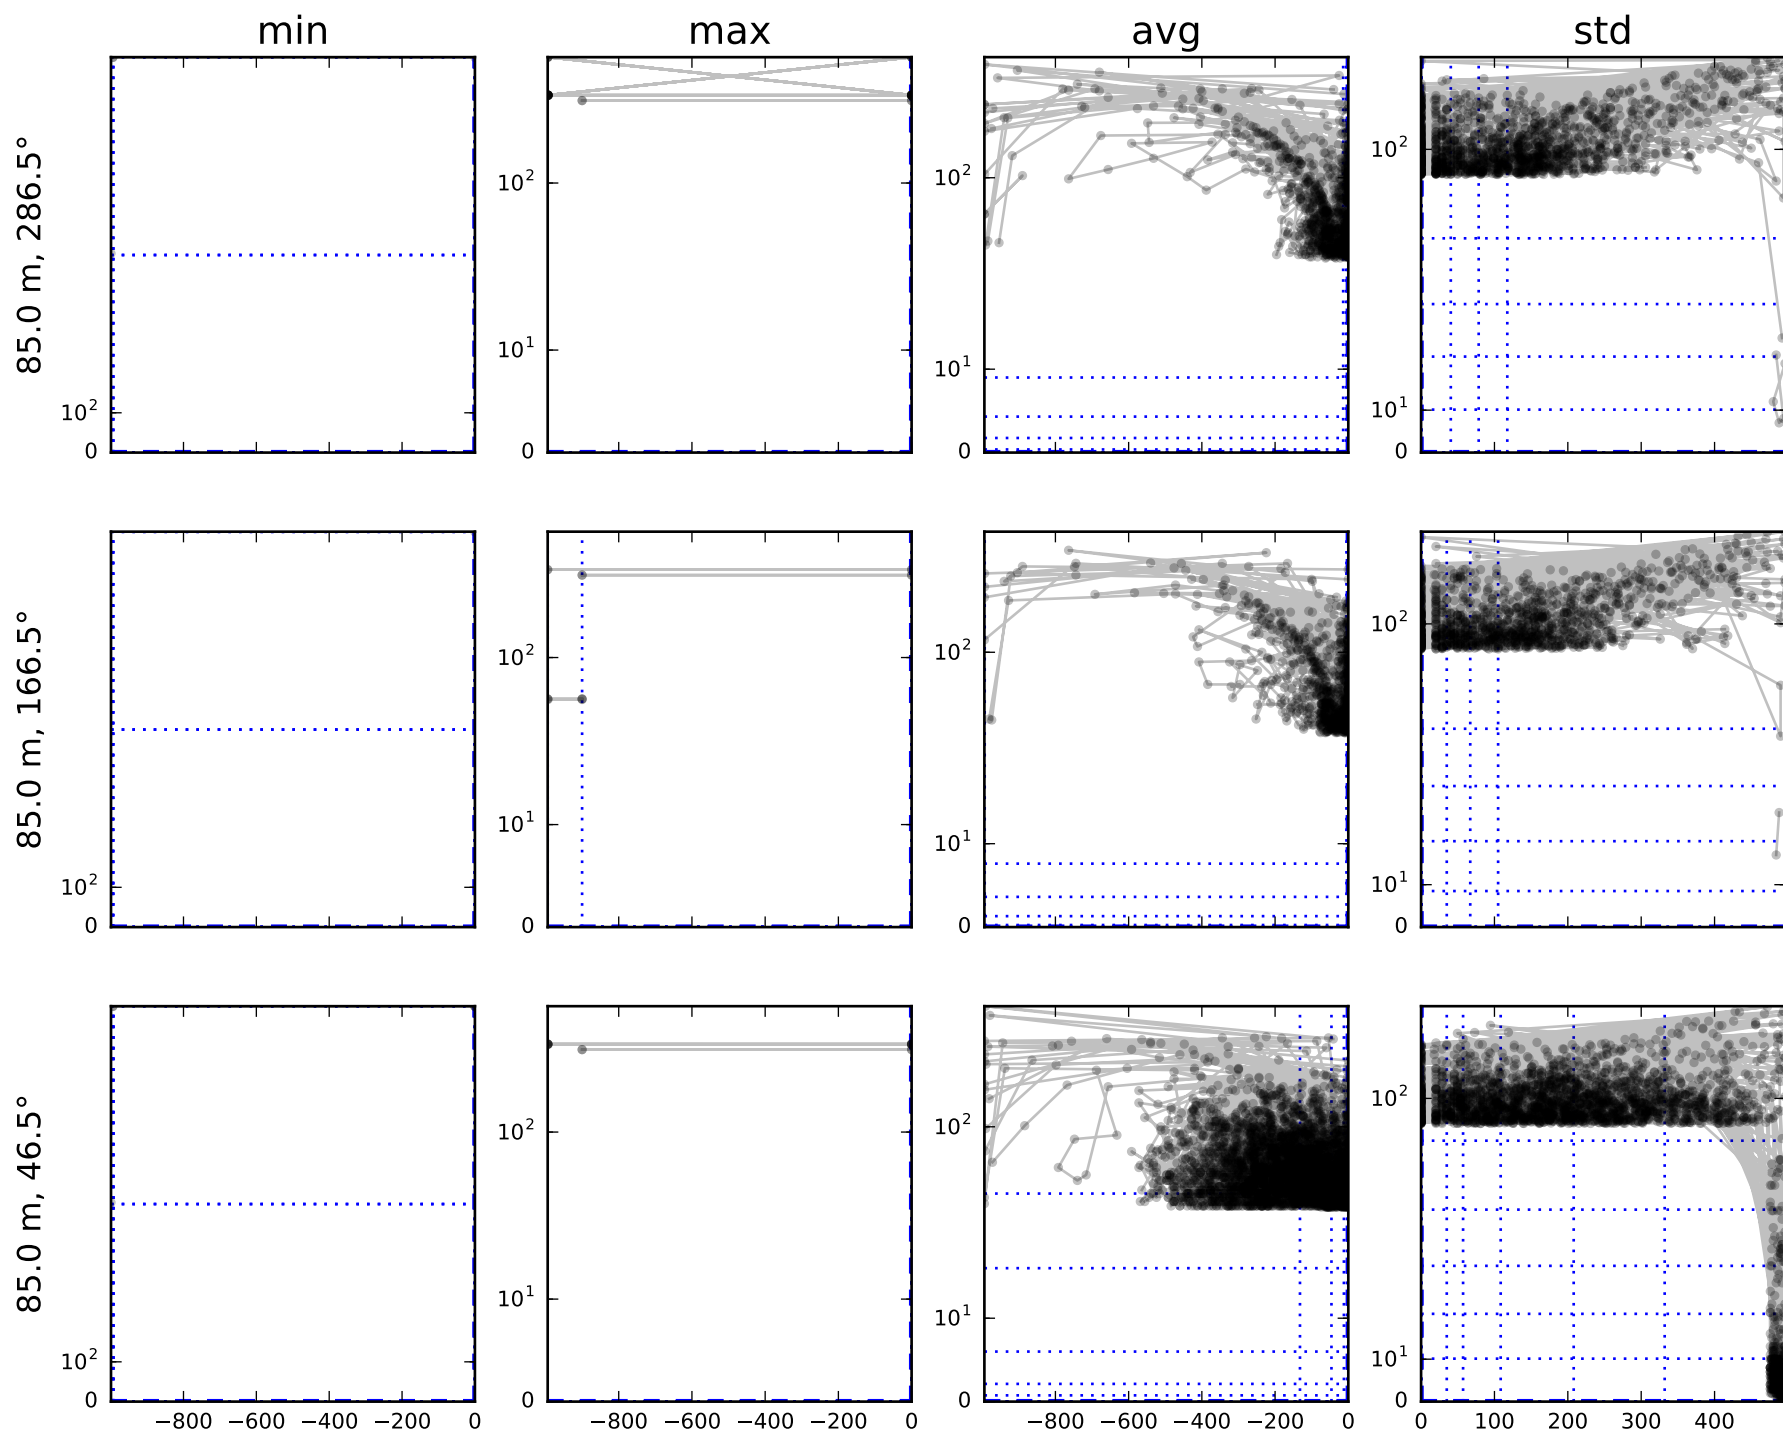

Supplement: Supplementary file 21 [file wes-2019-42-supplement.zip]

OWEZ HMP/at (ambient temperature, units: °C)

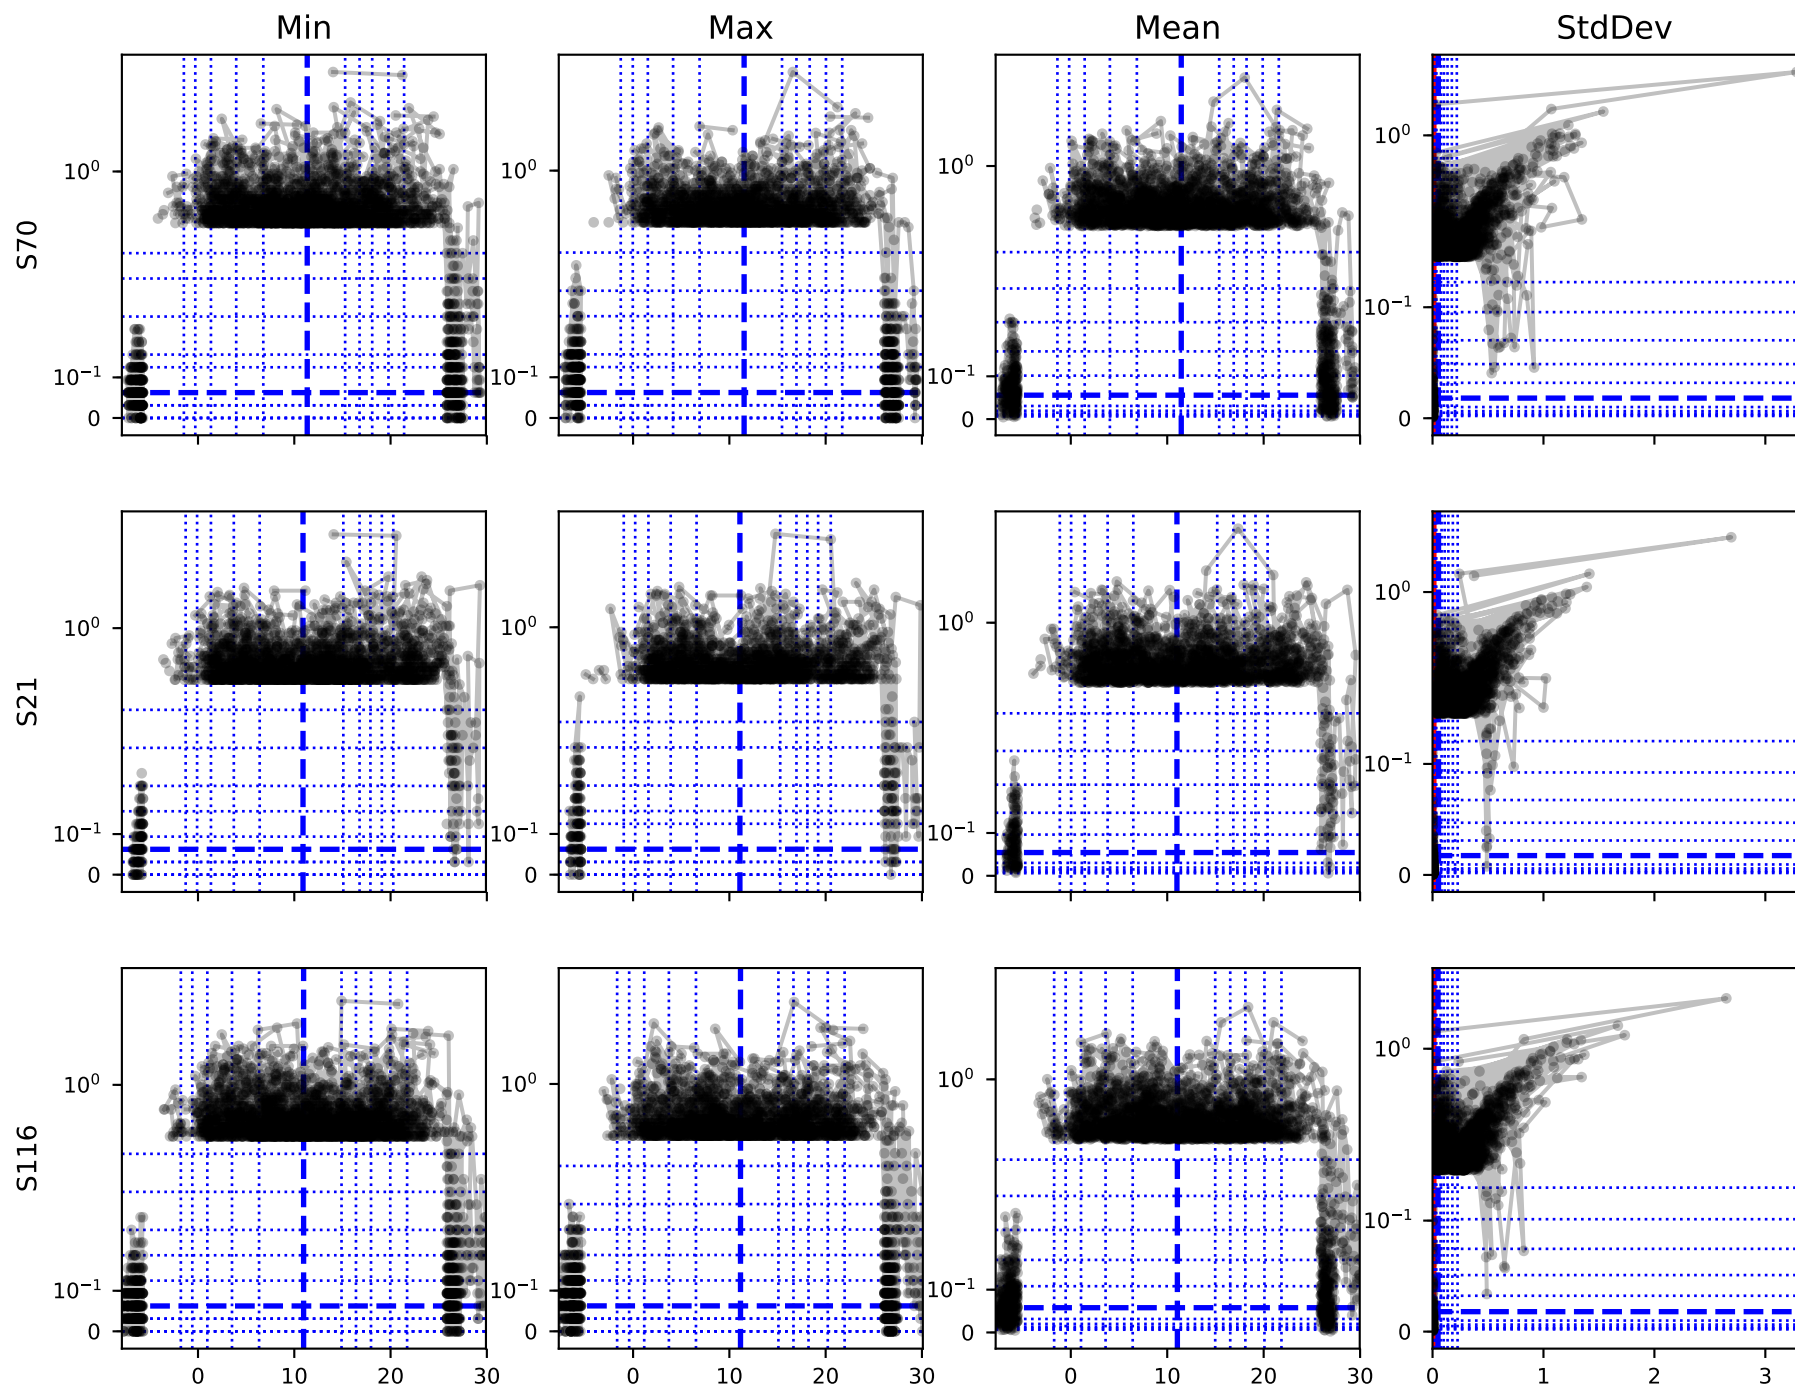

Supplement: Supplementary file 22 [file wes-2019-42-supplement.zip]

OWEZ WM/vws (vertical wind speed, units: m/s)

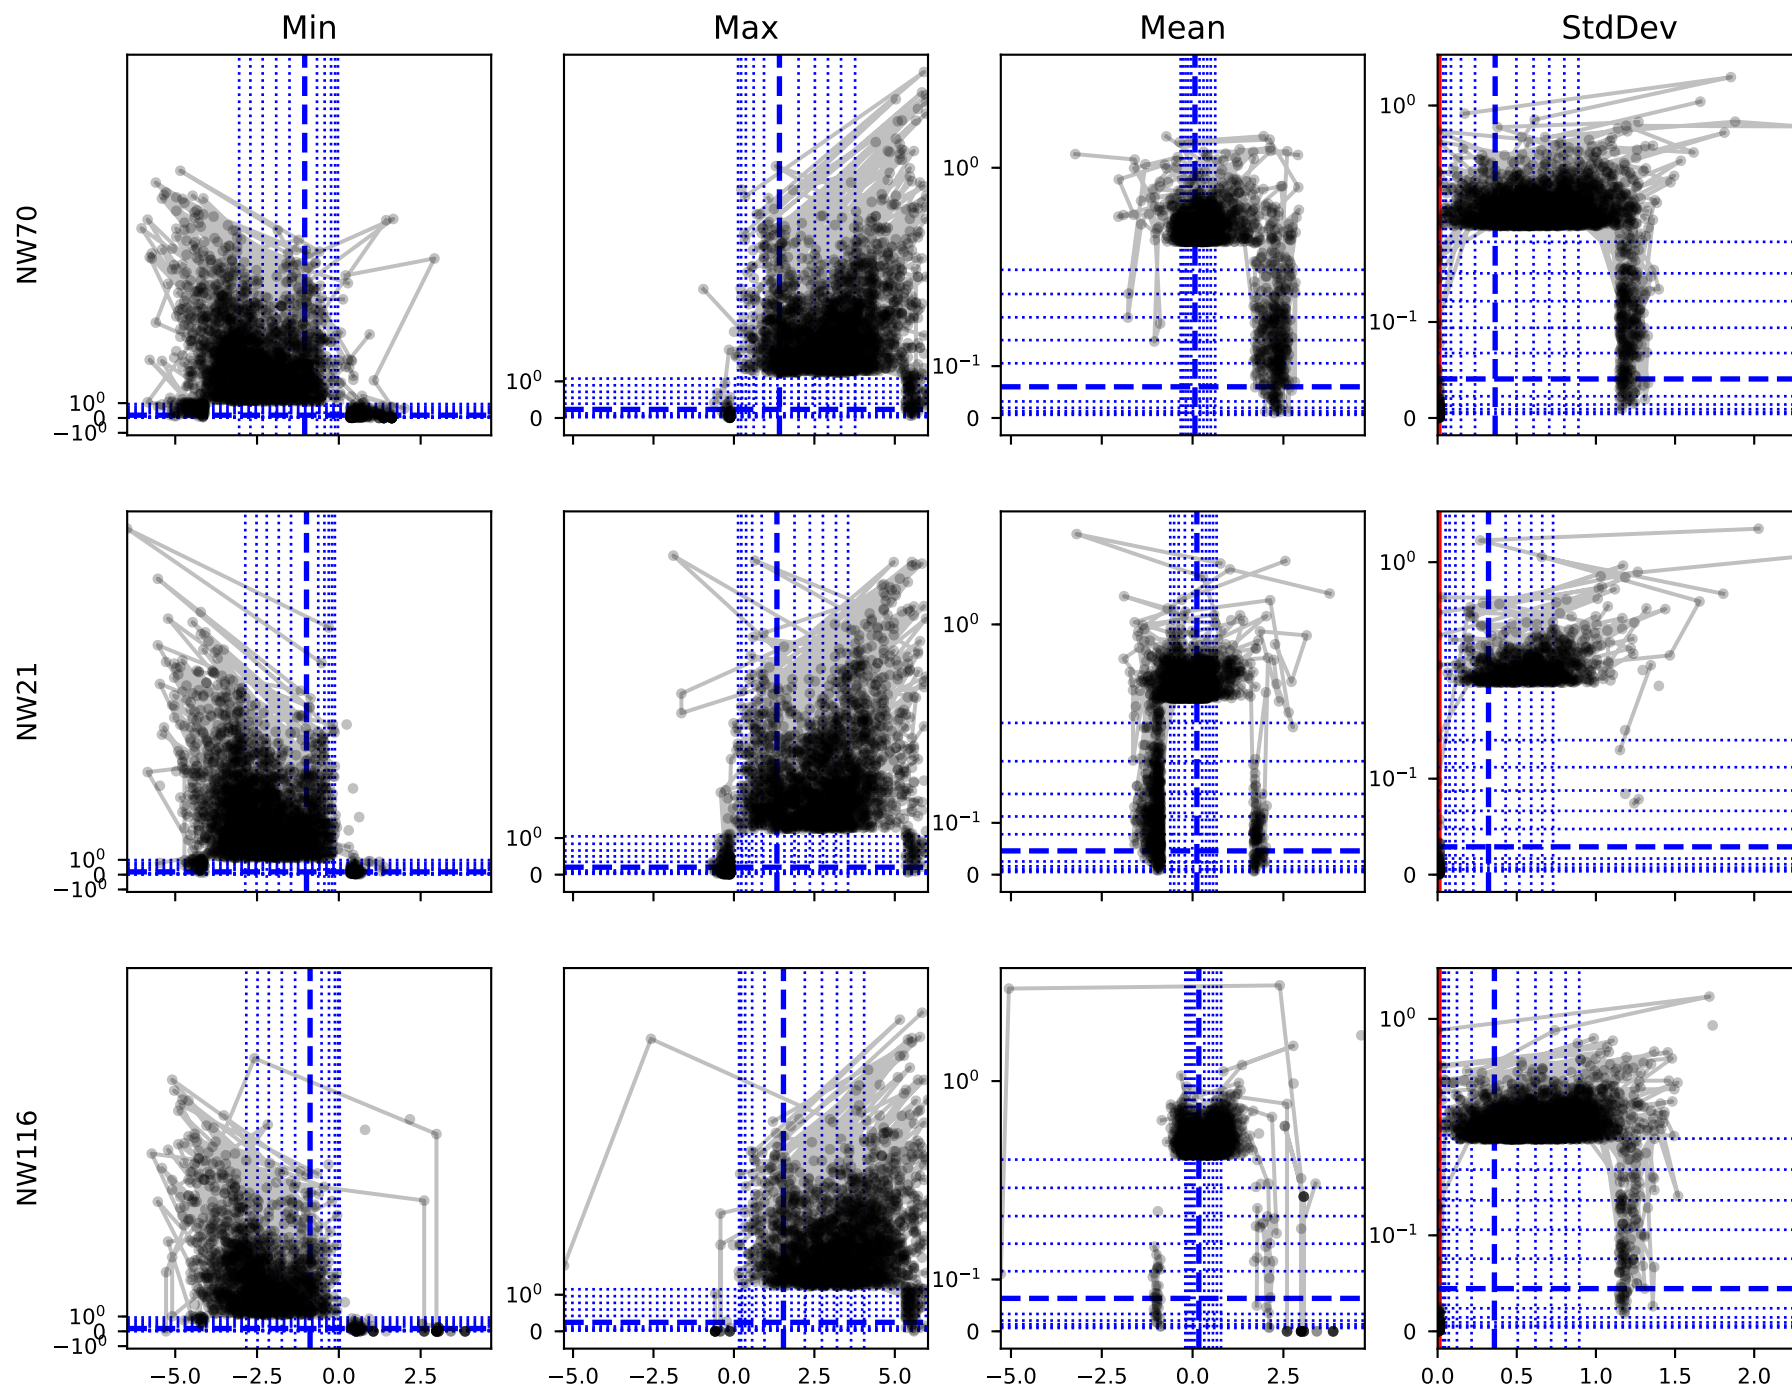

Supplement: Supplementary file 23 [file wes-2019-42-supplement.zip]

OWEZ AWAC/cv11 (current velocity 11 m, units: m/s)

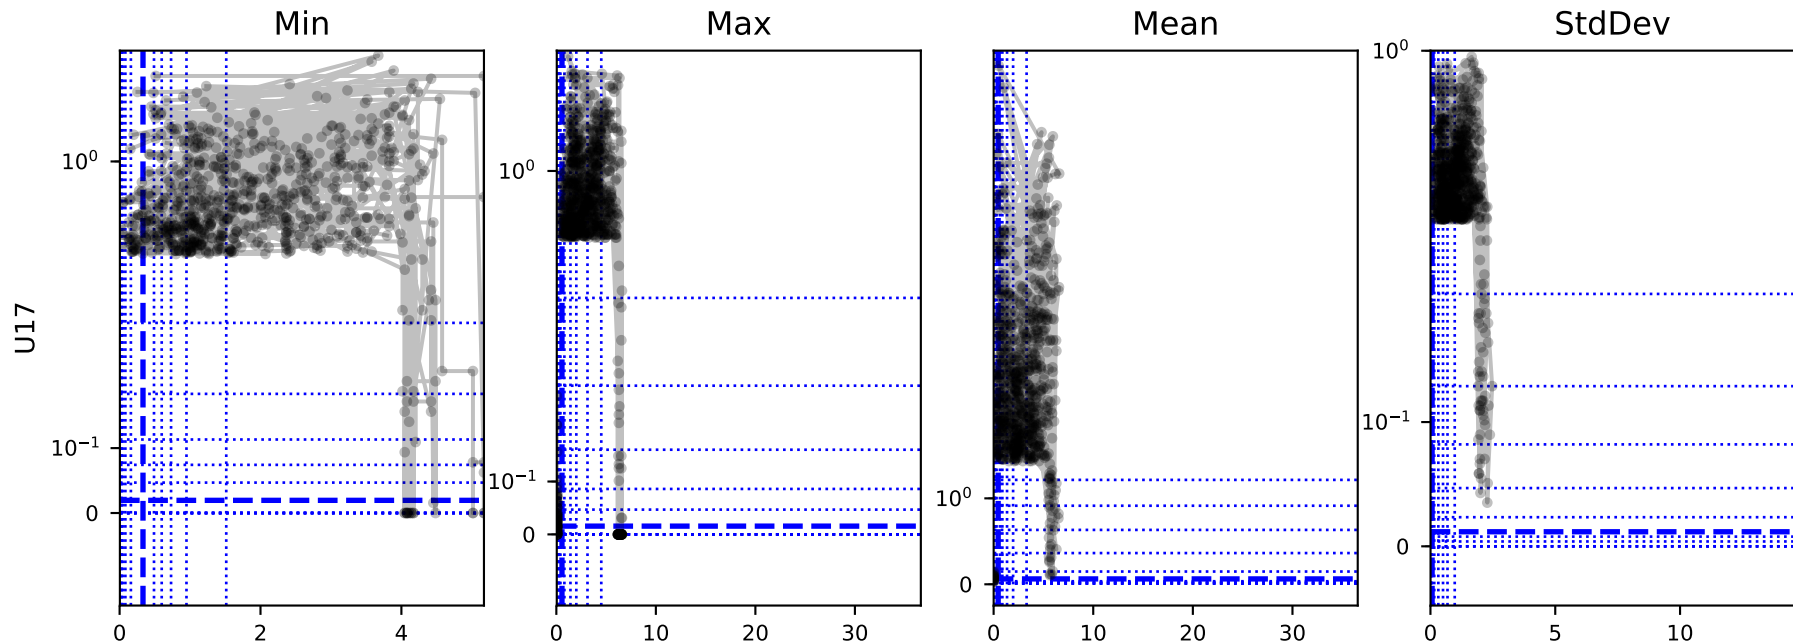

Supplement: Supplementary file 24 [file wes-2019-42-supplement.zip]

MMIJ USA/WsHor (calculated wind speed, units: m/s)

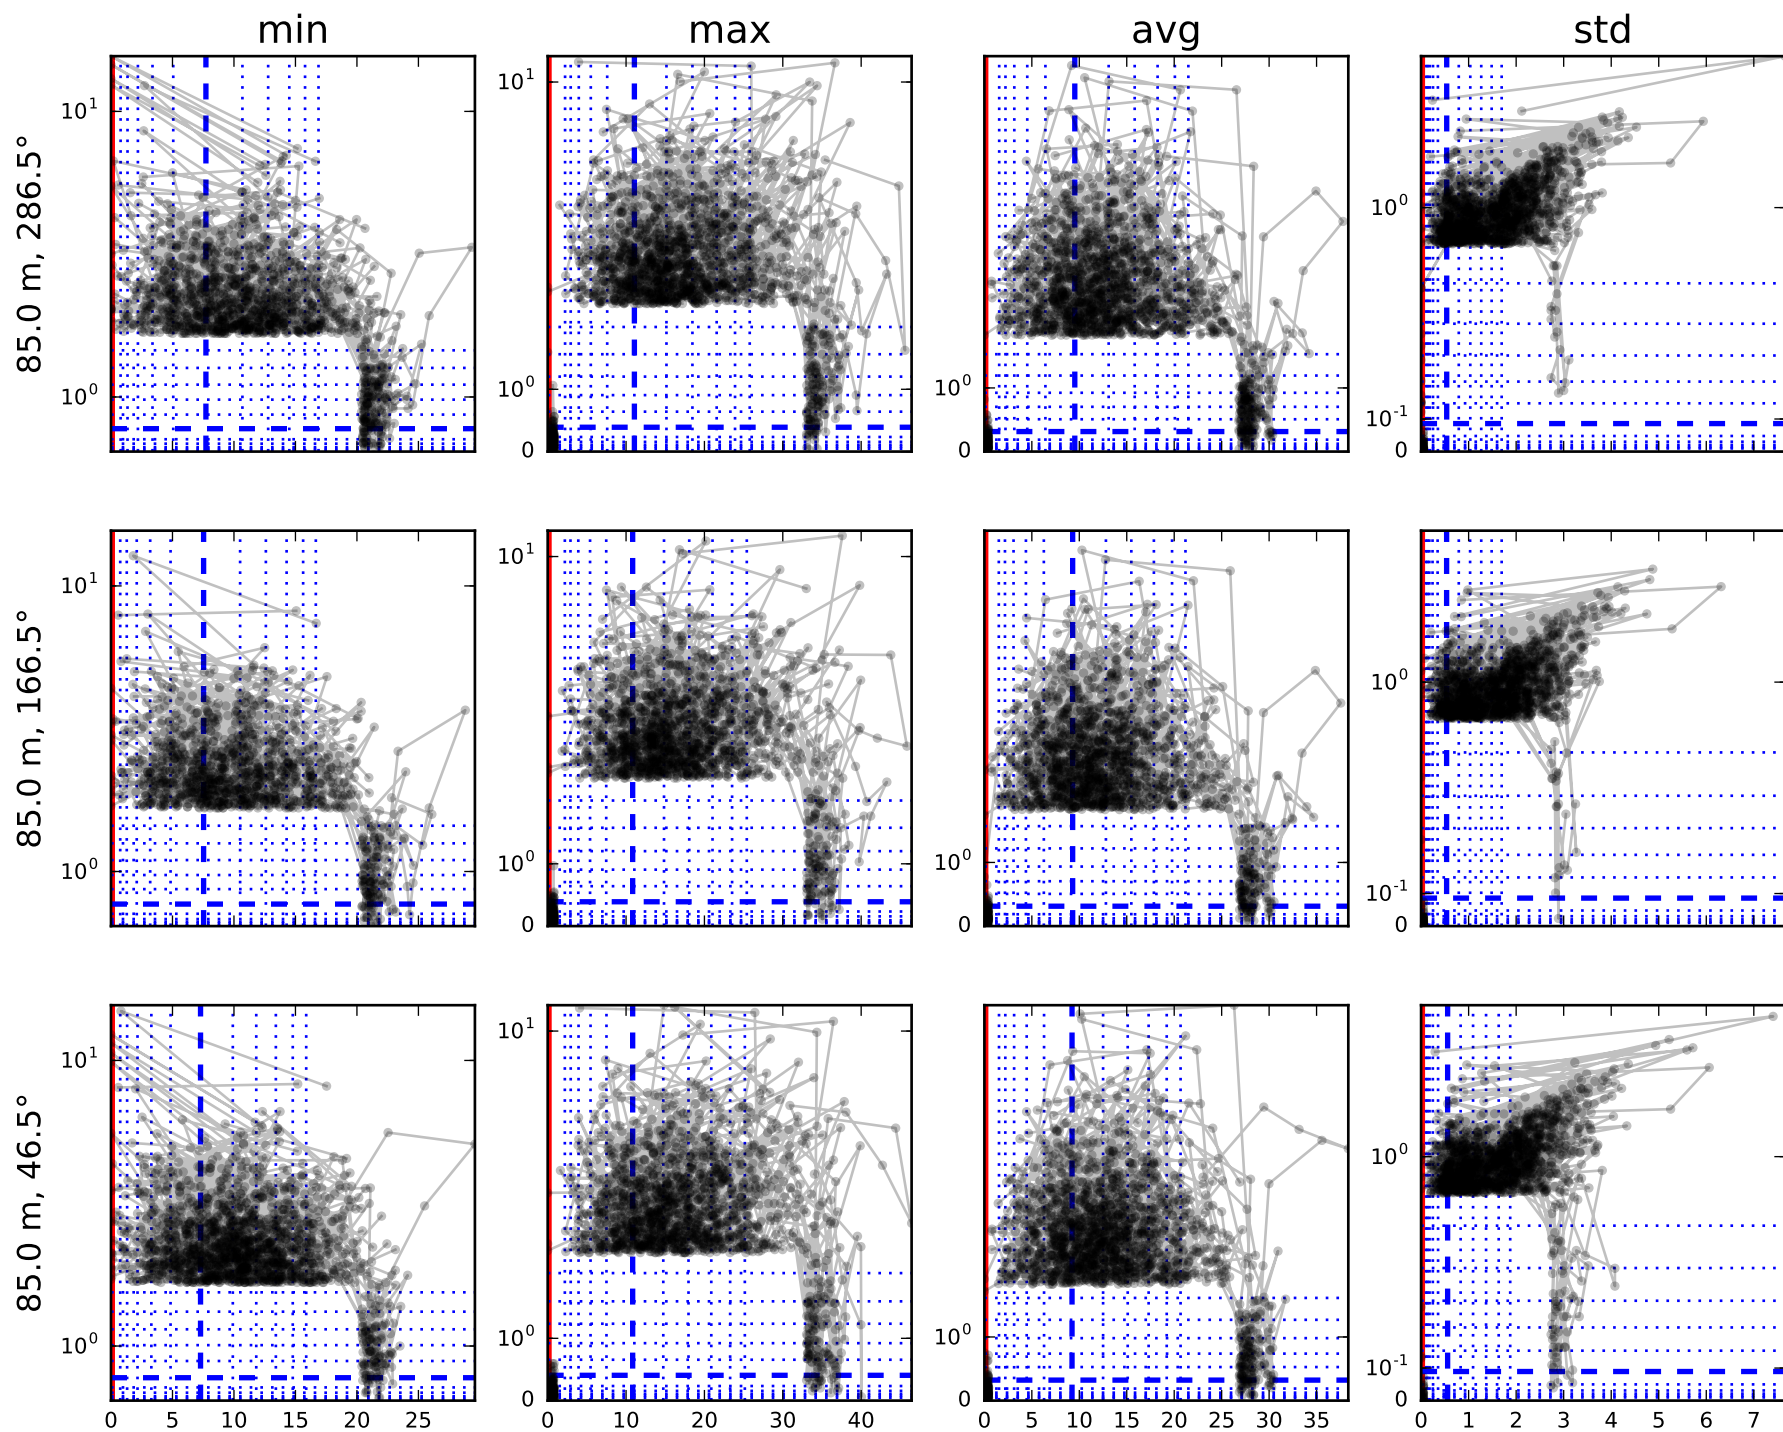

Supplement: Supplementary file 25 [file wes-2019-42-supplement.zip]

OWEZ AWAC/vp (wave period, units: s)

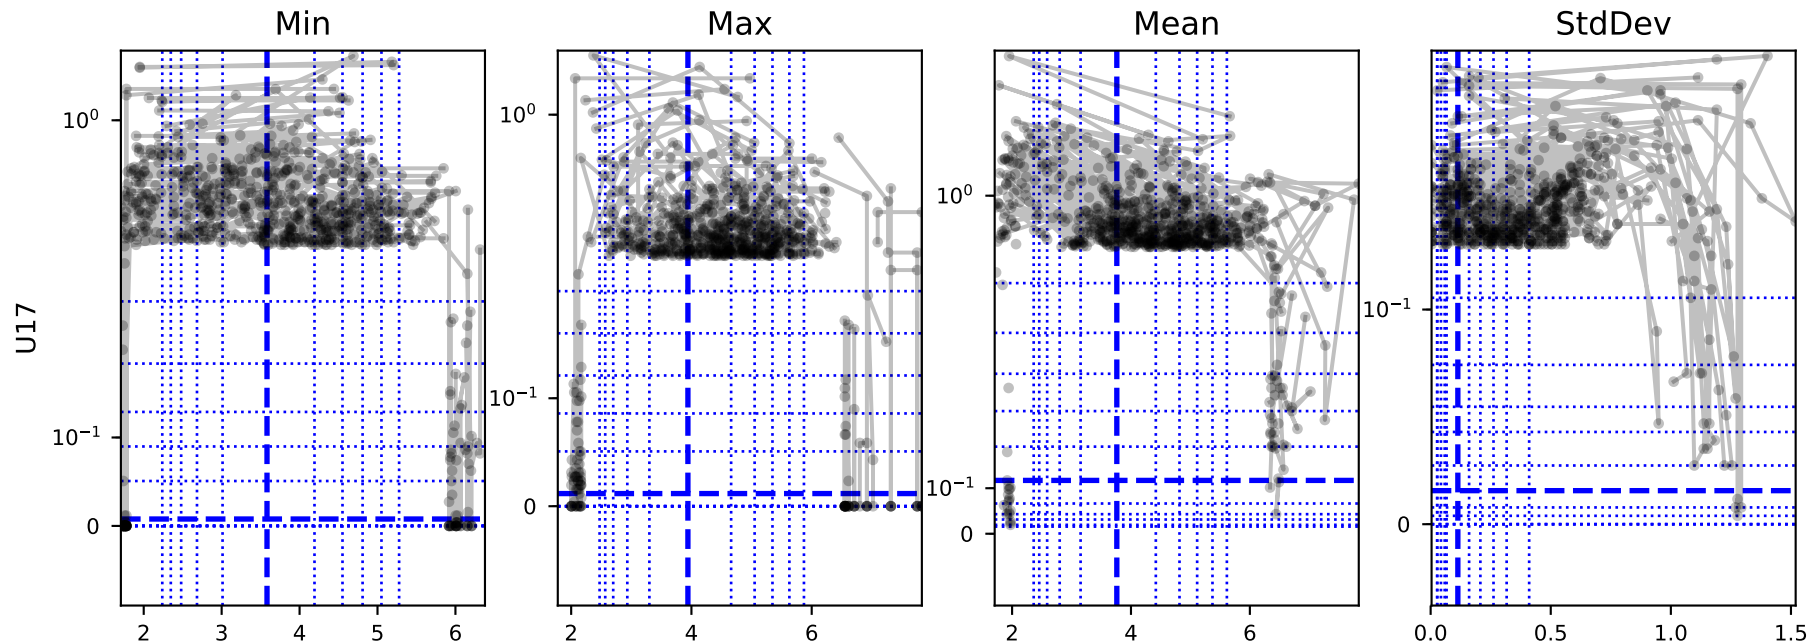

Supplement: Supplementary file 26 [file wes-2019-42-supplement.zip]

MMIJ CA/TrueWs (tower shadow-corrected wind speed, units: m/s)

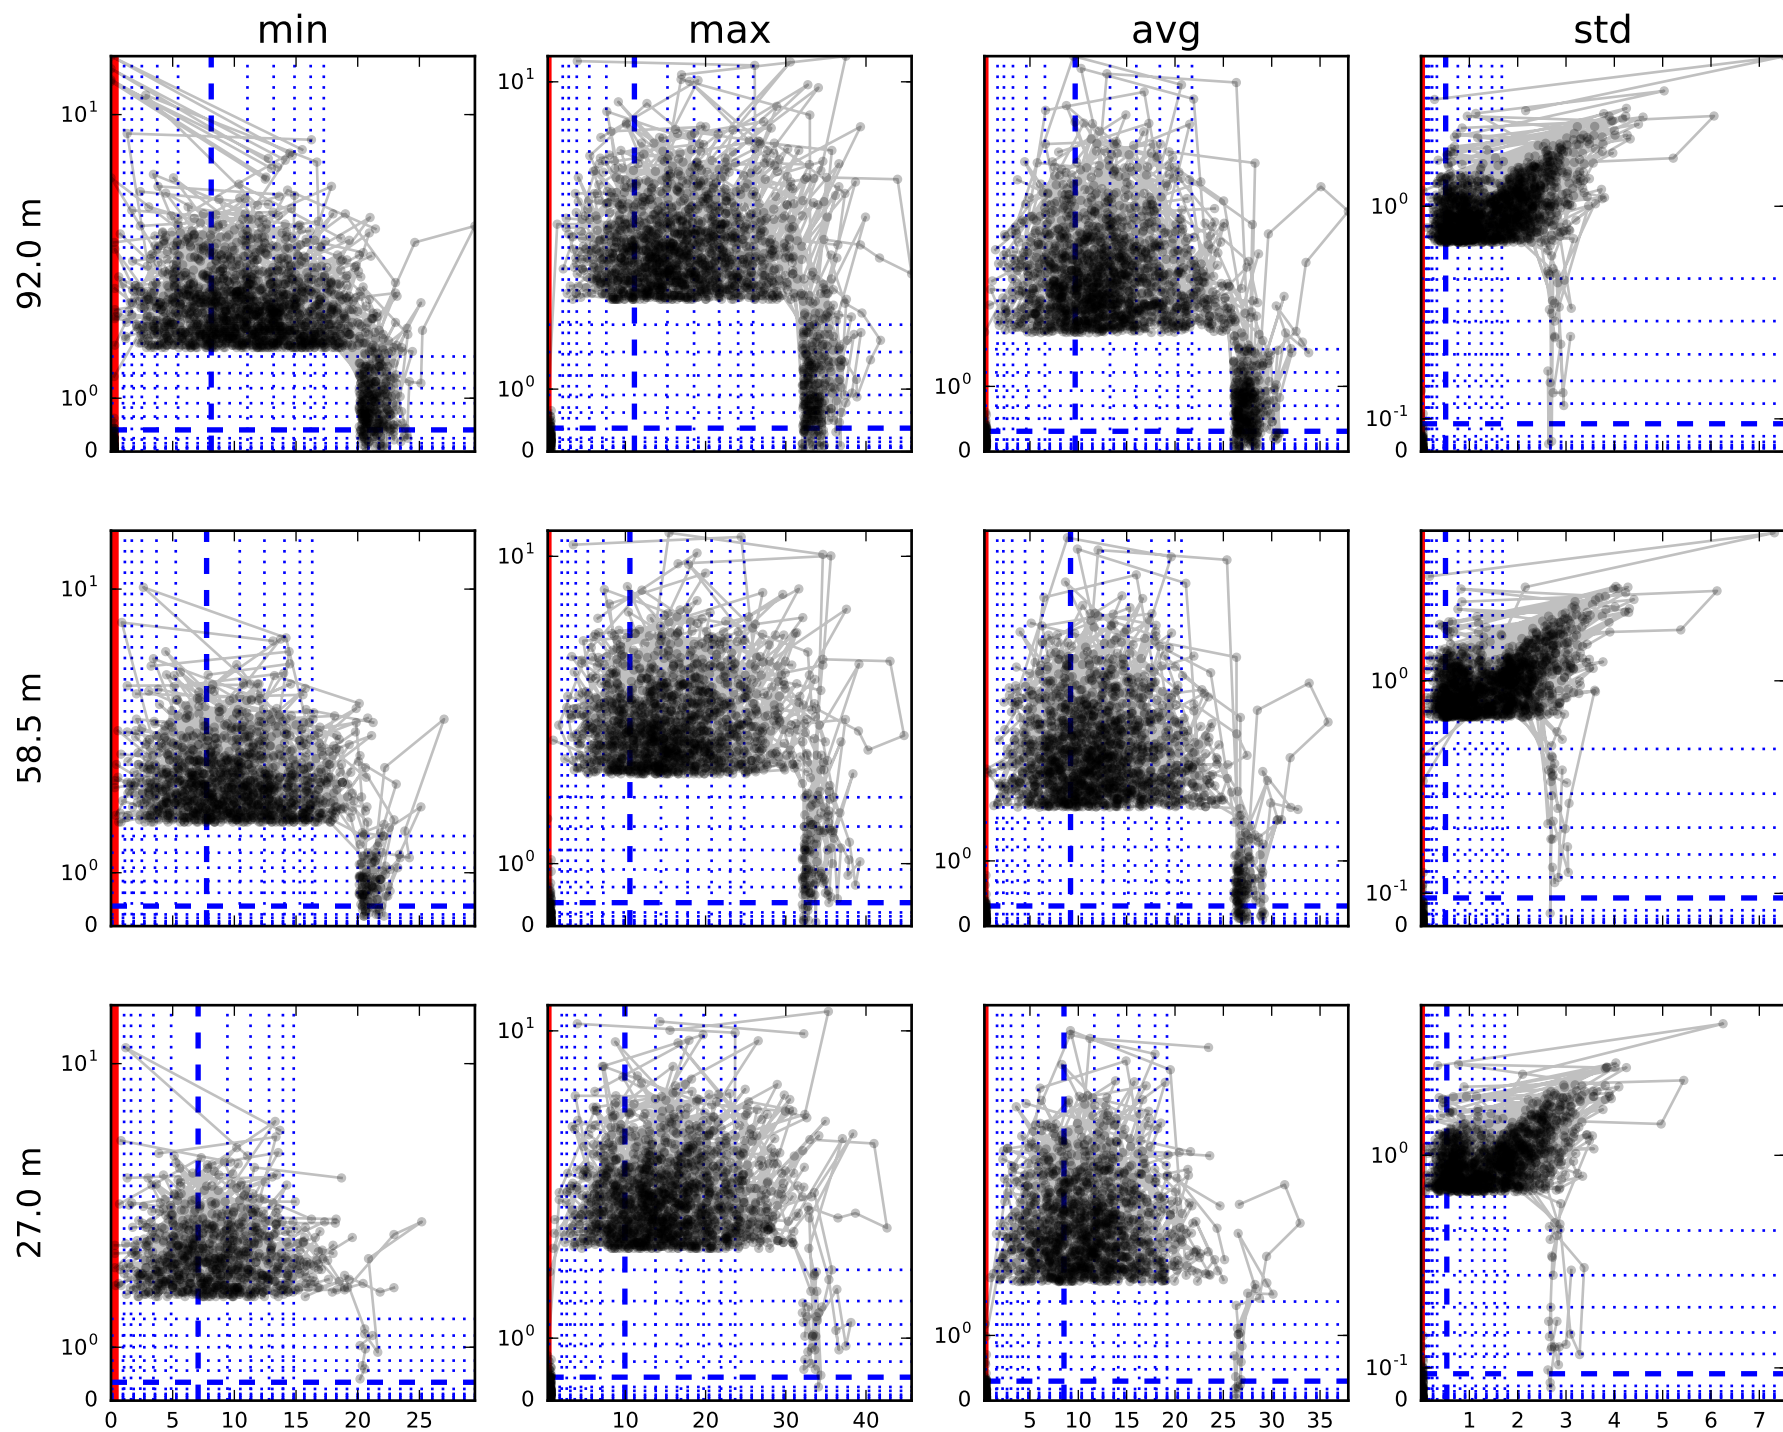

Supplement: Supplementary file 27 [file wes-2019-42-supplement.zip]

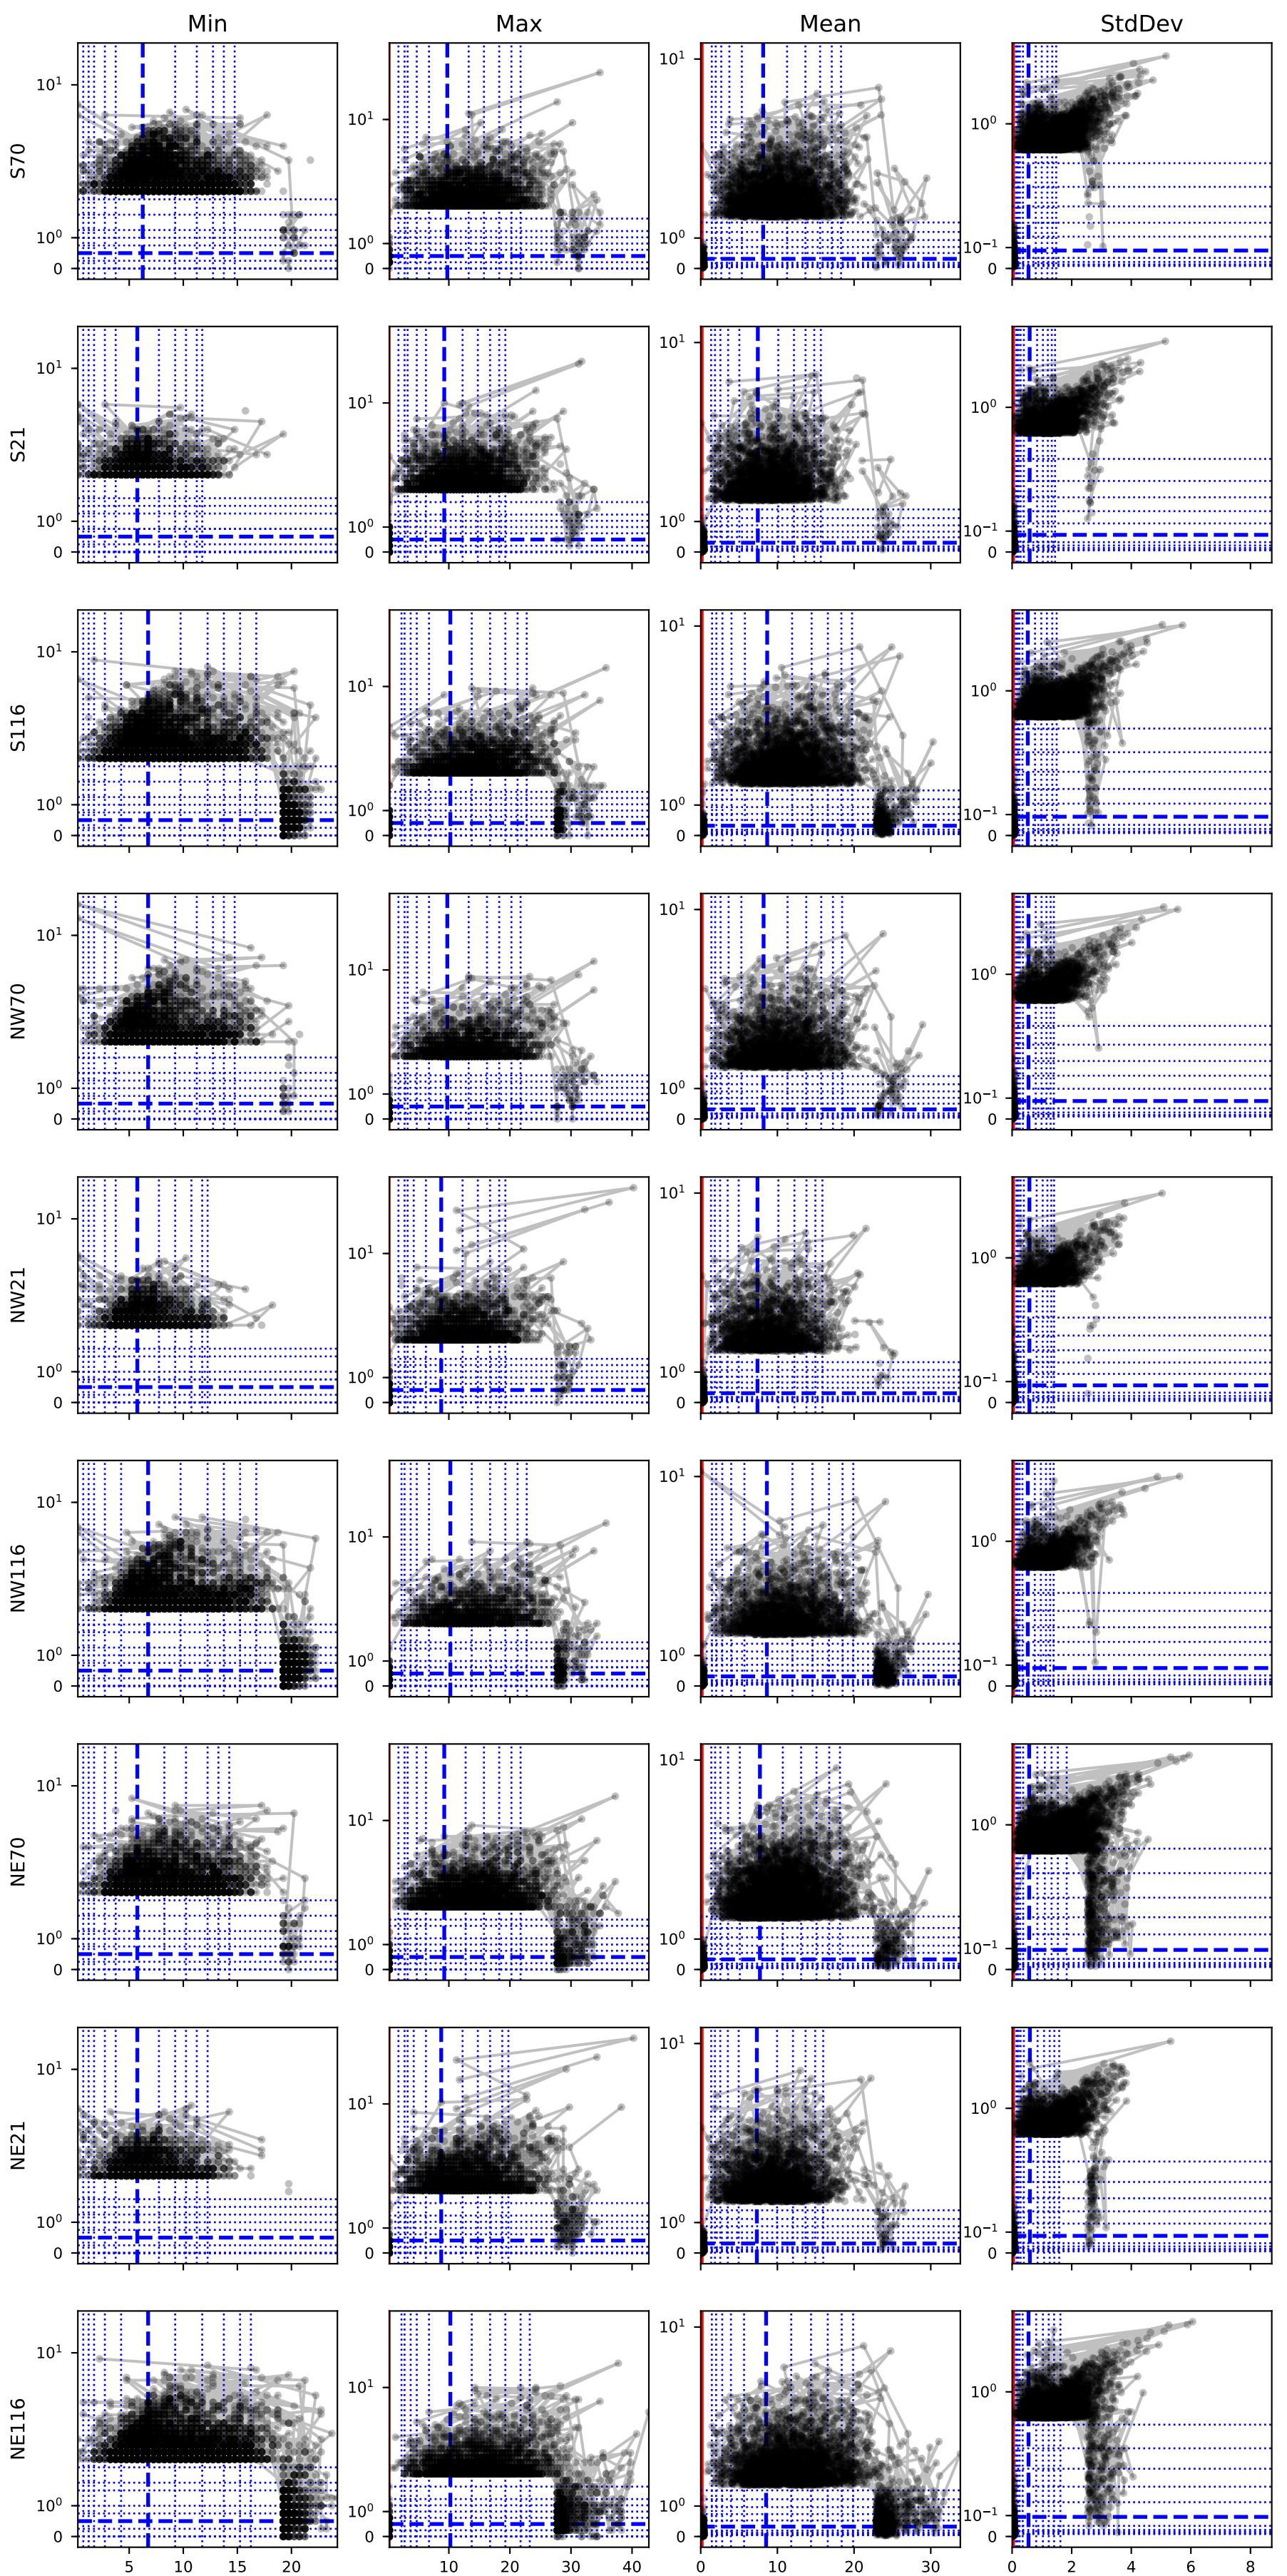

Supplement: Supplementary file 28 [file wes-2019-42-supplement.zip]

FINO1 PS/Ni (intensity of precipitation, units: mA)

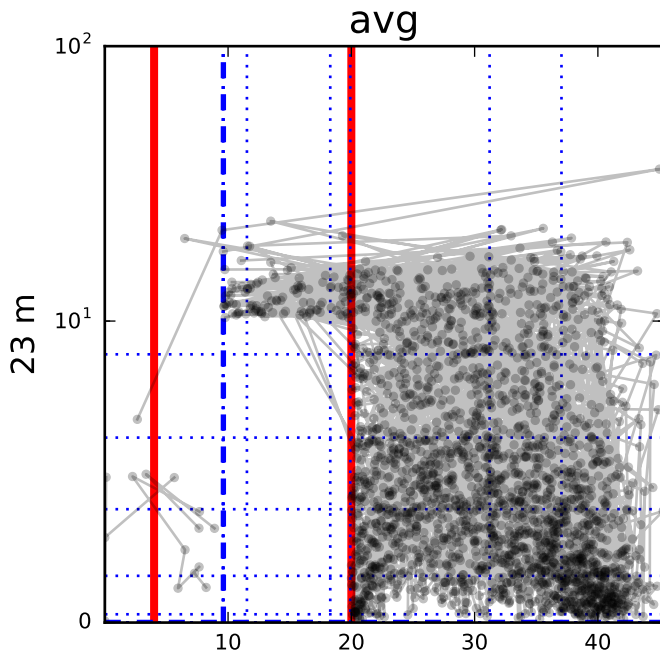

Supplement: Supplementary file 29 [file wes-2019-42-supplement.zip]

OWEZ AWAC/cd11 (current direction 11 m, units: °)

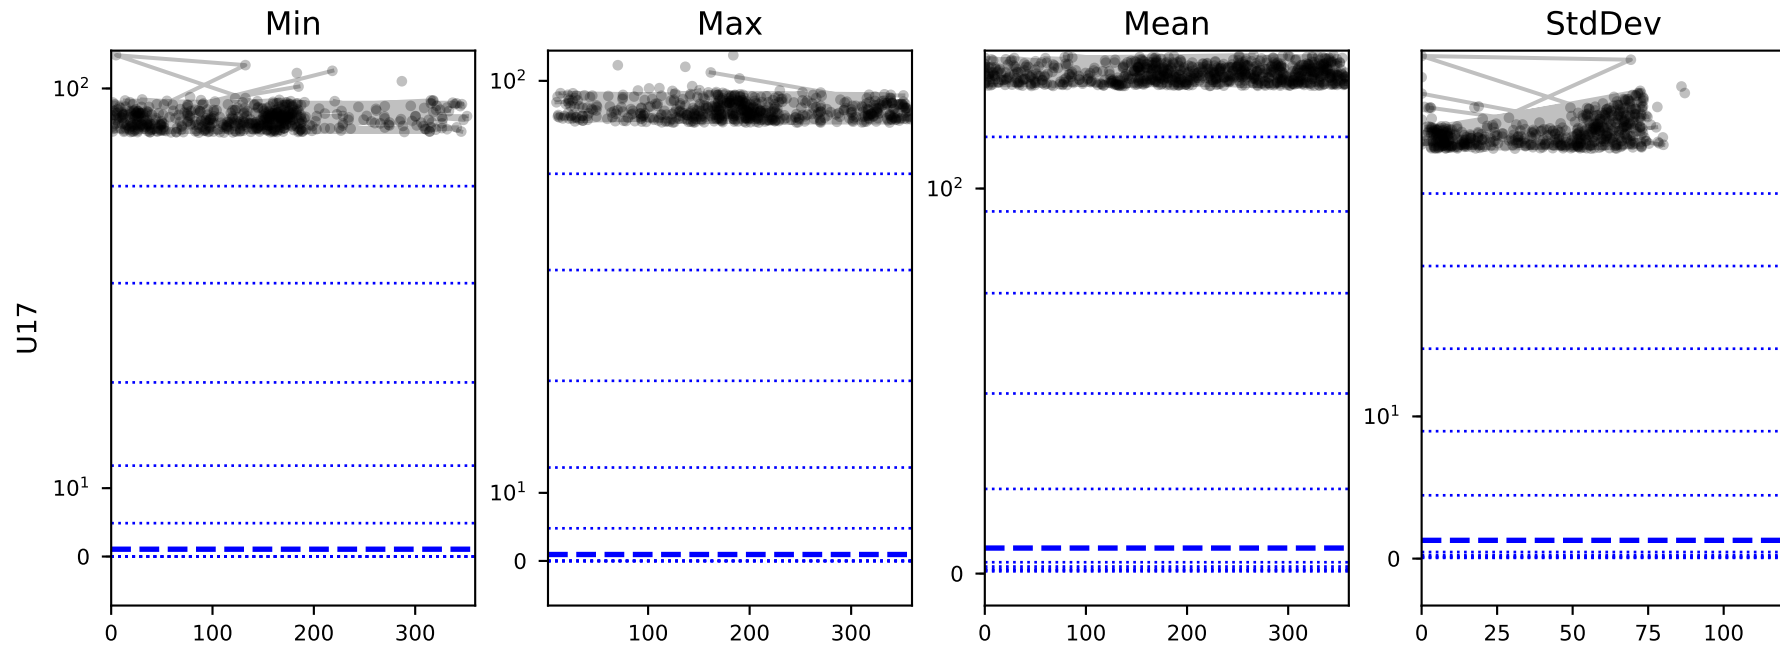

Supplement: Supplementary file 30 [file wes-2019-42-supplement.zip]

MMIJ USA/WsYSon (wind speed Y, units: m/s)

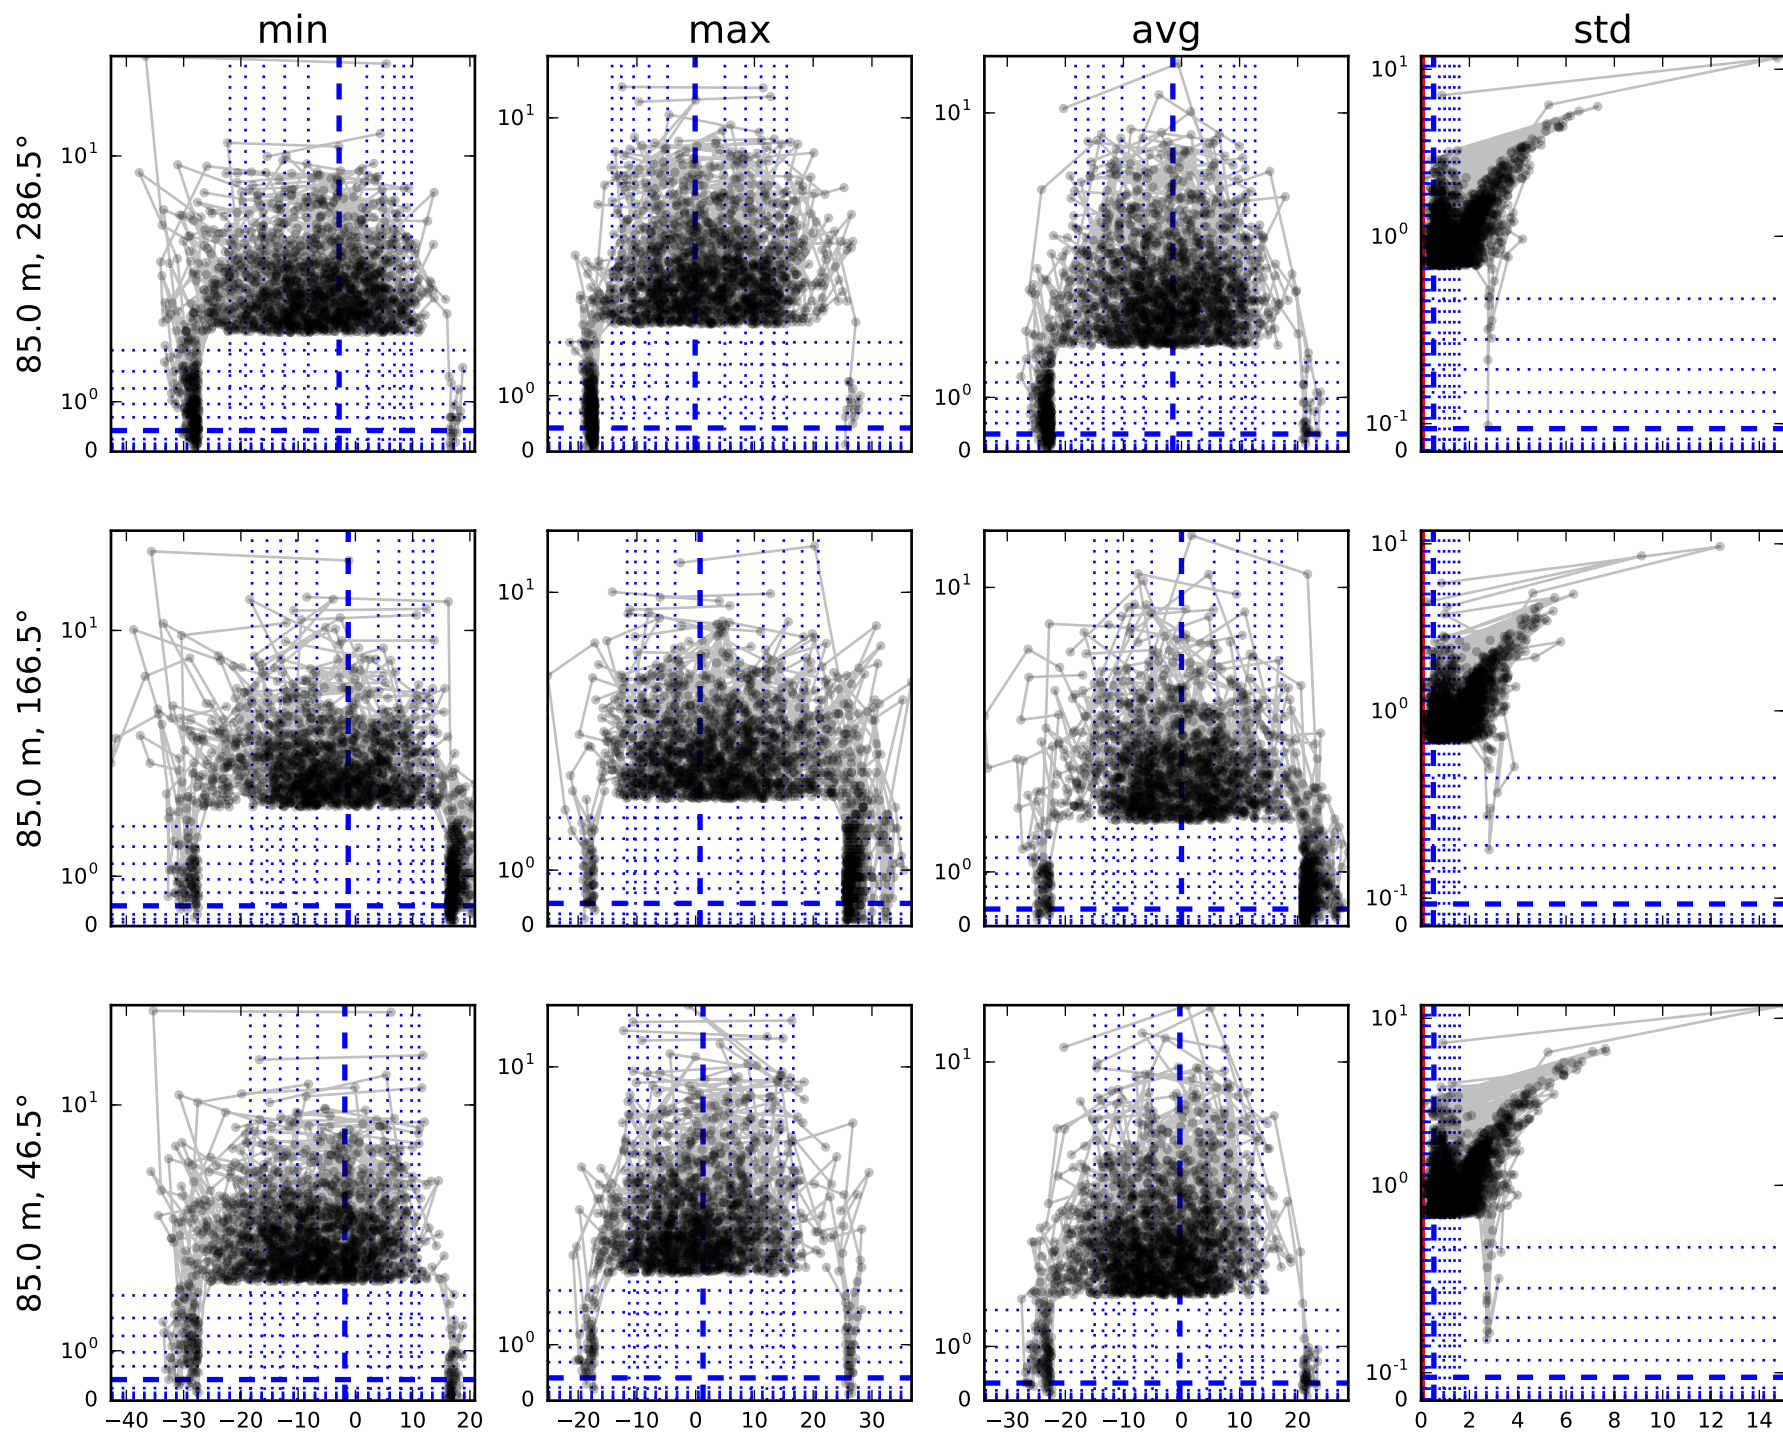

Supplement: Supplementary file 31 [file wes-2019-42-supplement.zip]

# OWEZ PD/pl (precipitation level)

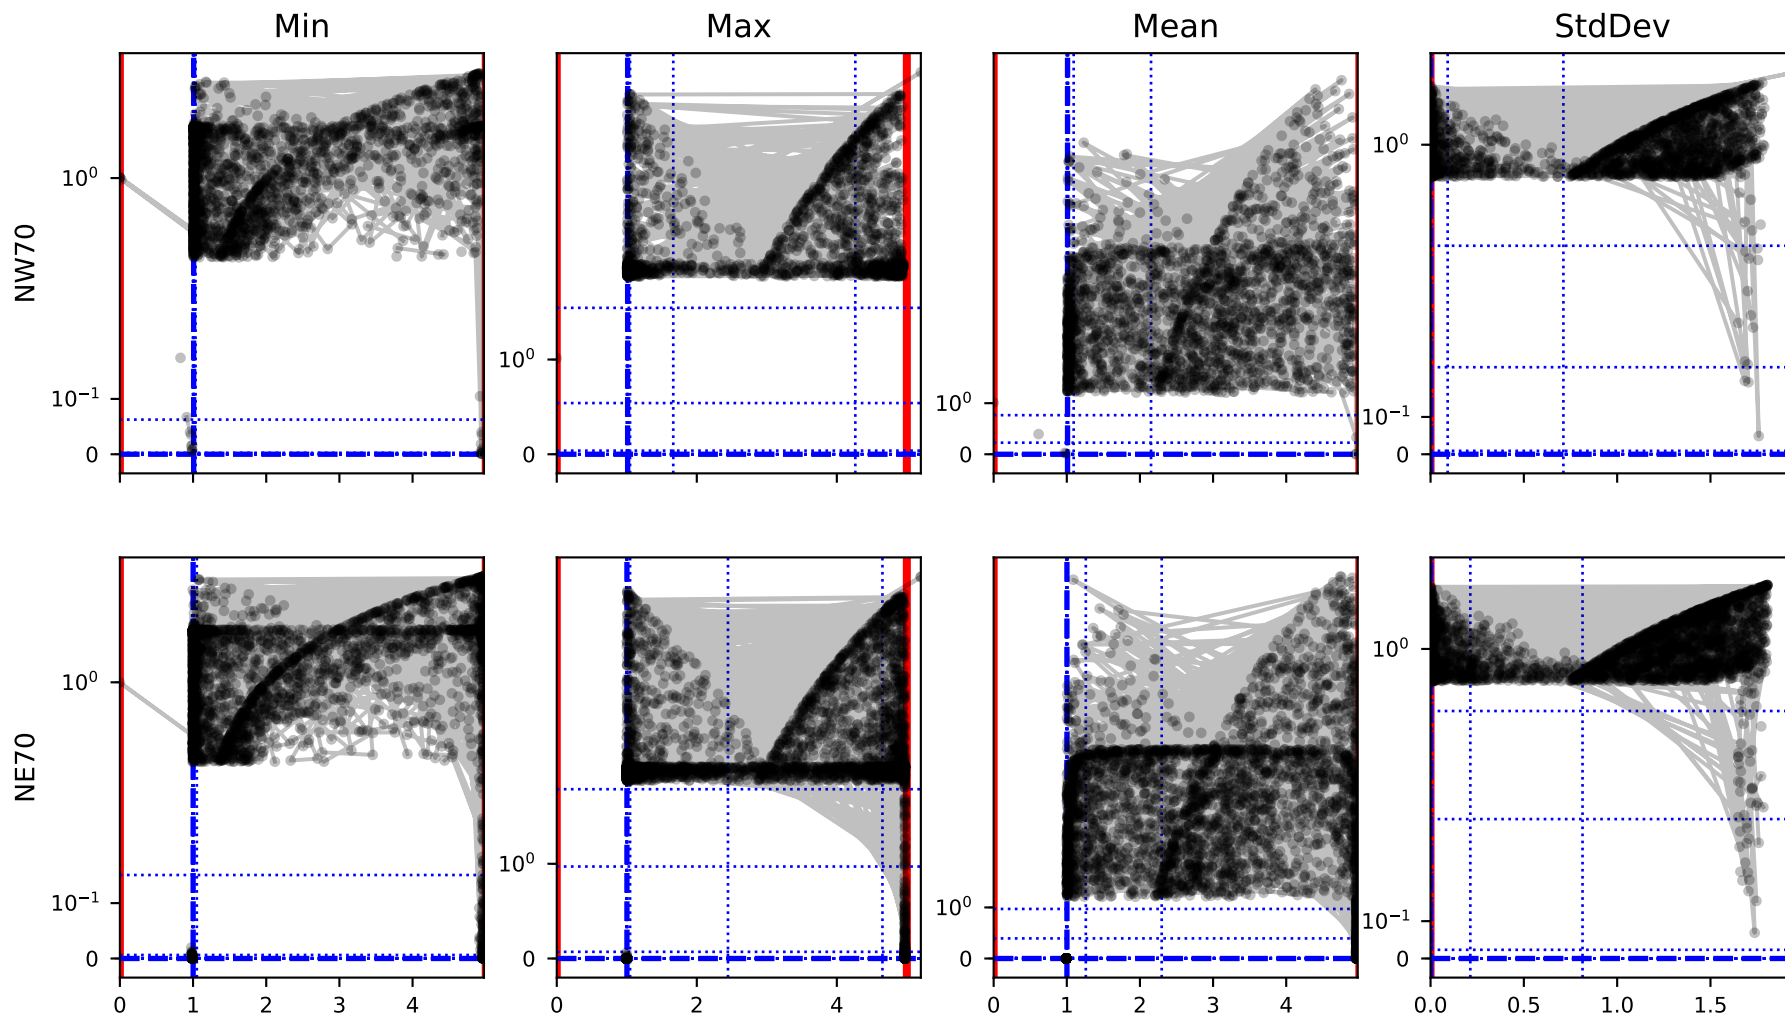

Supplement: Supplementary file 32 [file wes-2019-42-supplement.zip]

MMIJ CA/Ws (wind speed, units: m/s)

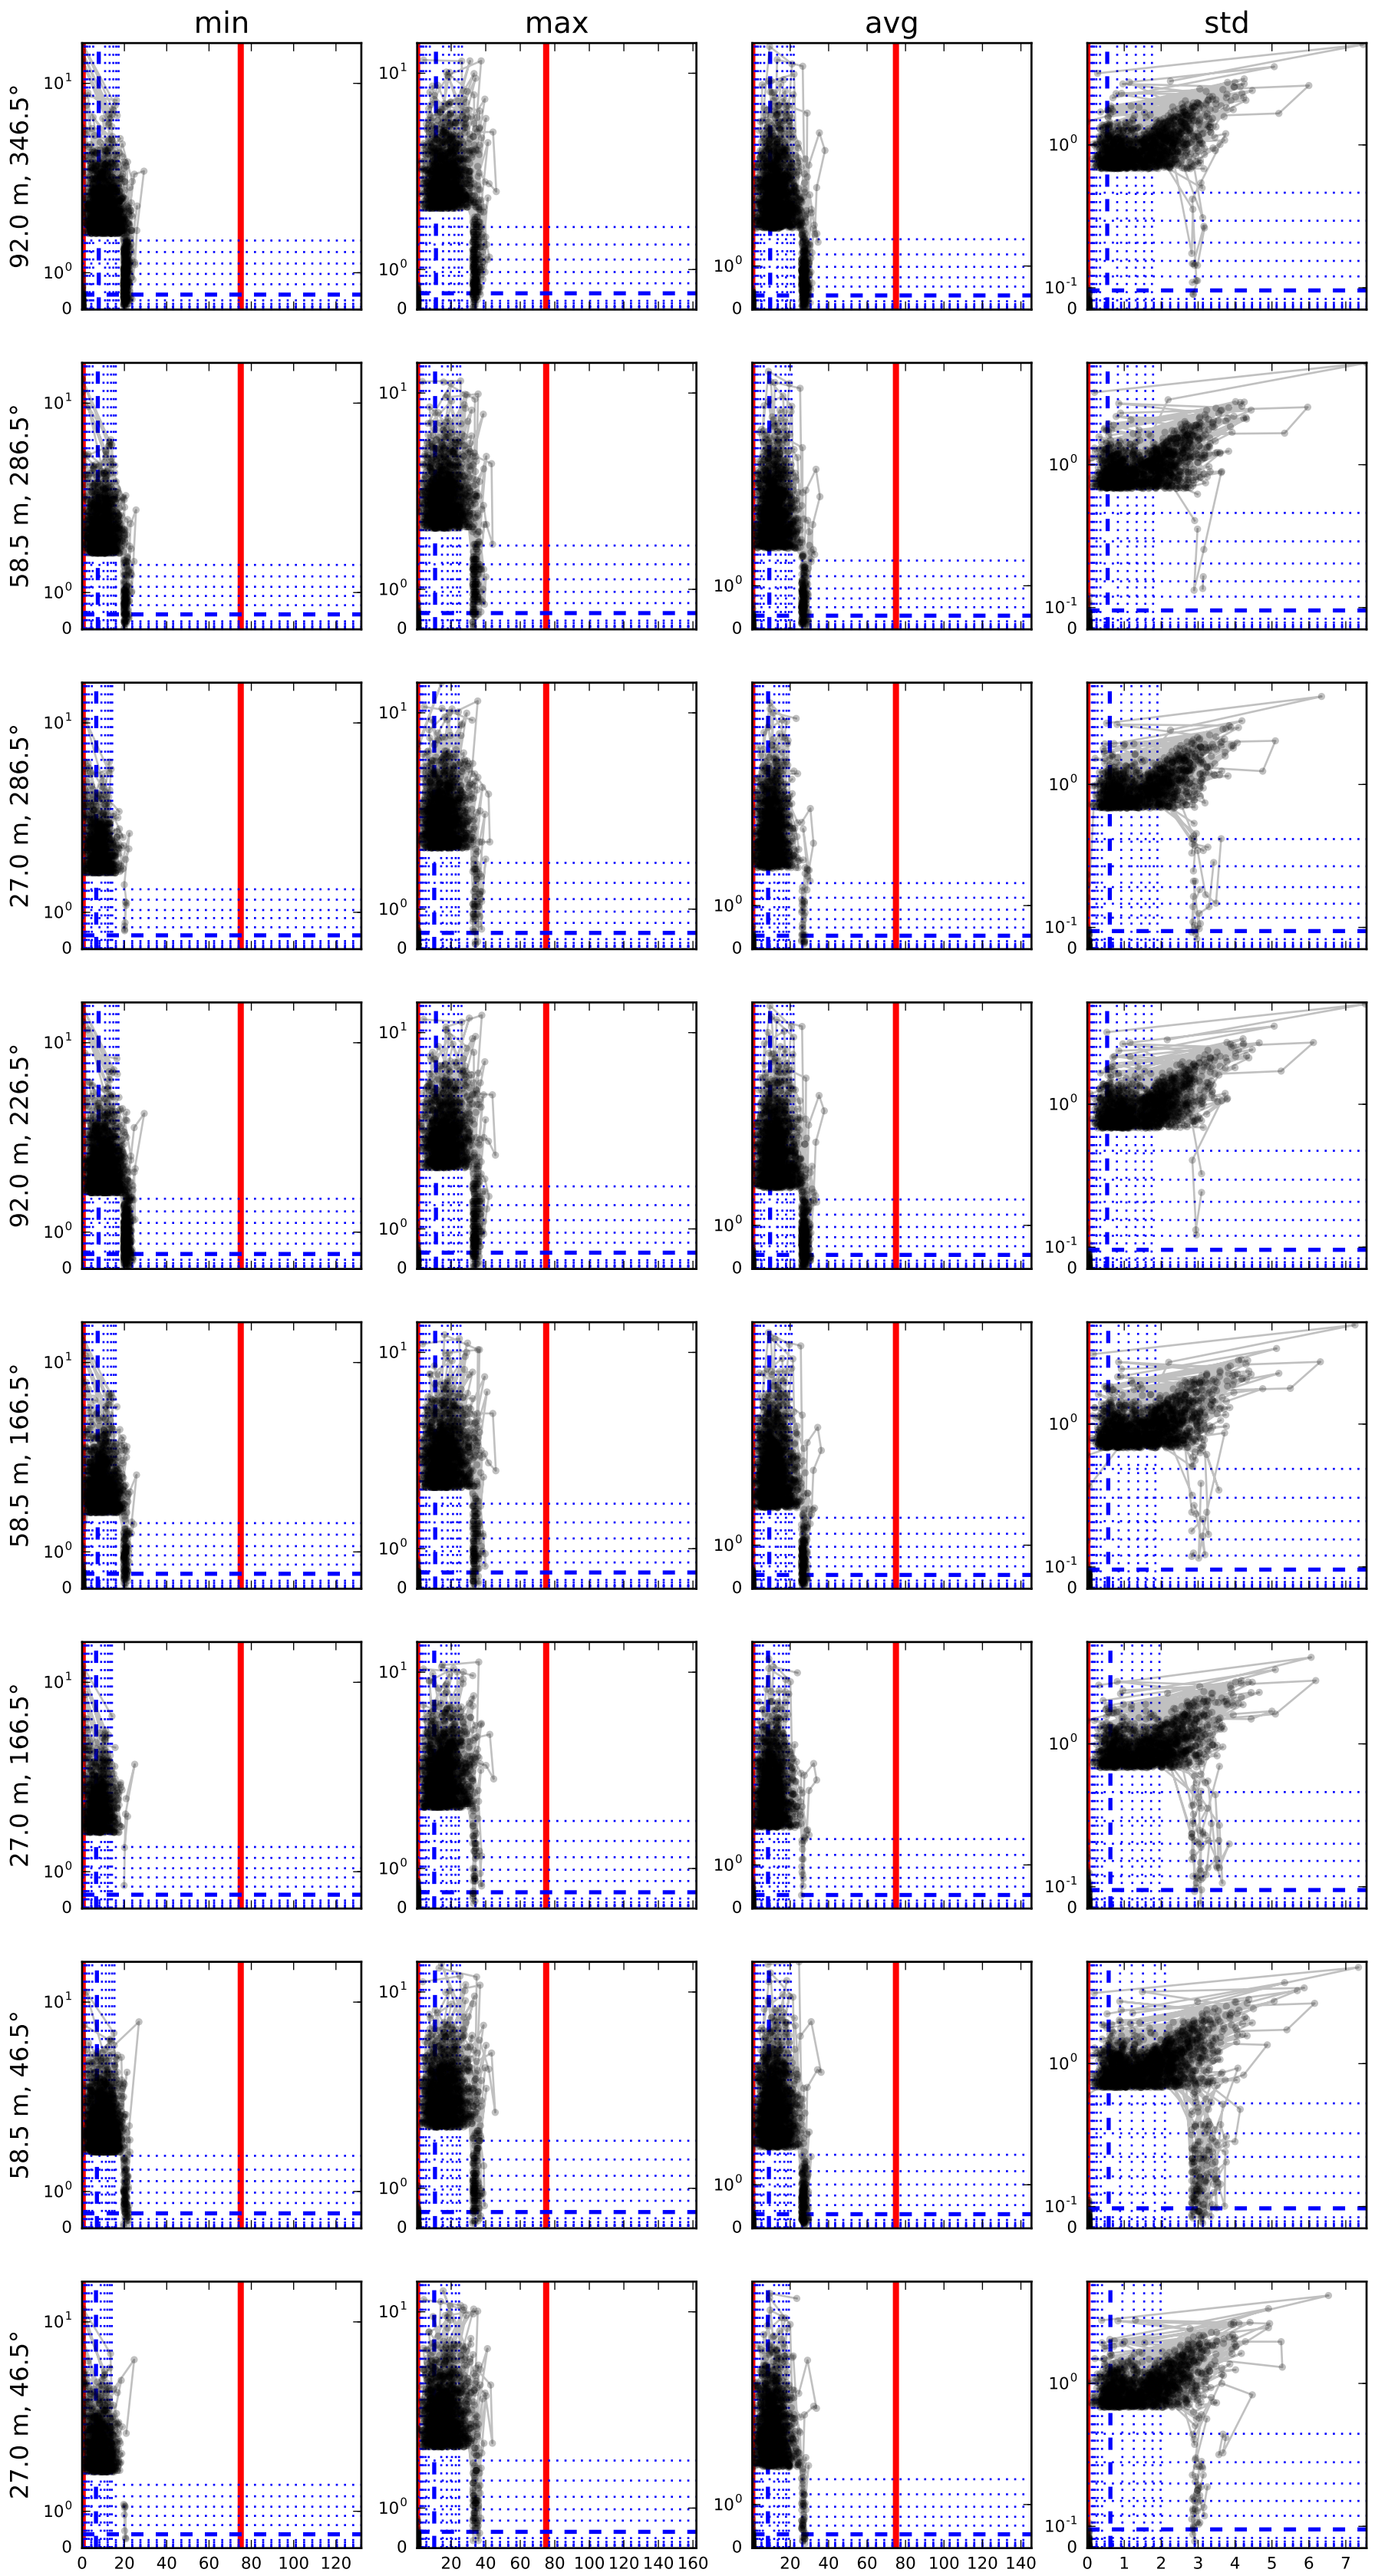

Supplement: Supplementary file 33 [file wes-2019-42-supplement.zip]

MMIJ WV/TrueWd (tower shadow-corrected wind direction, units: °)

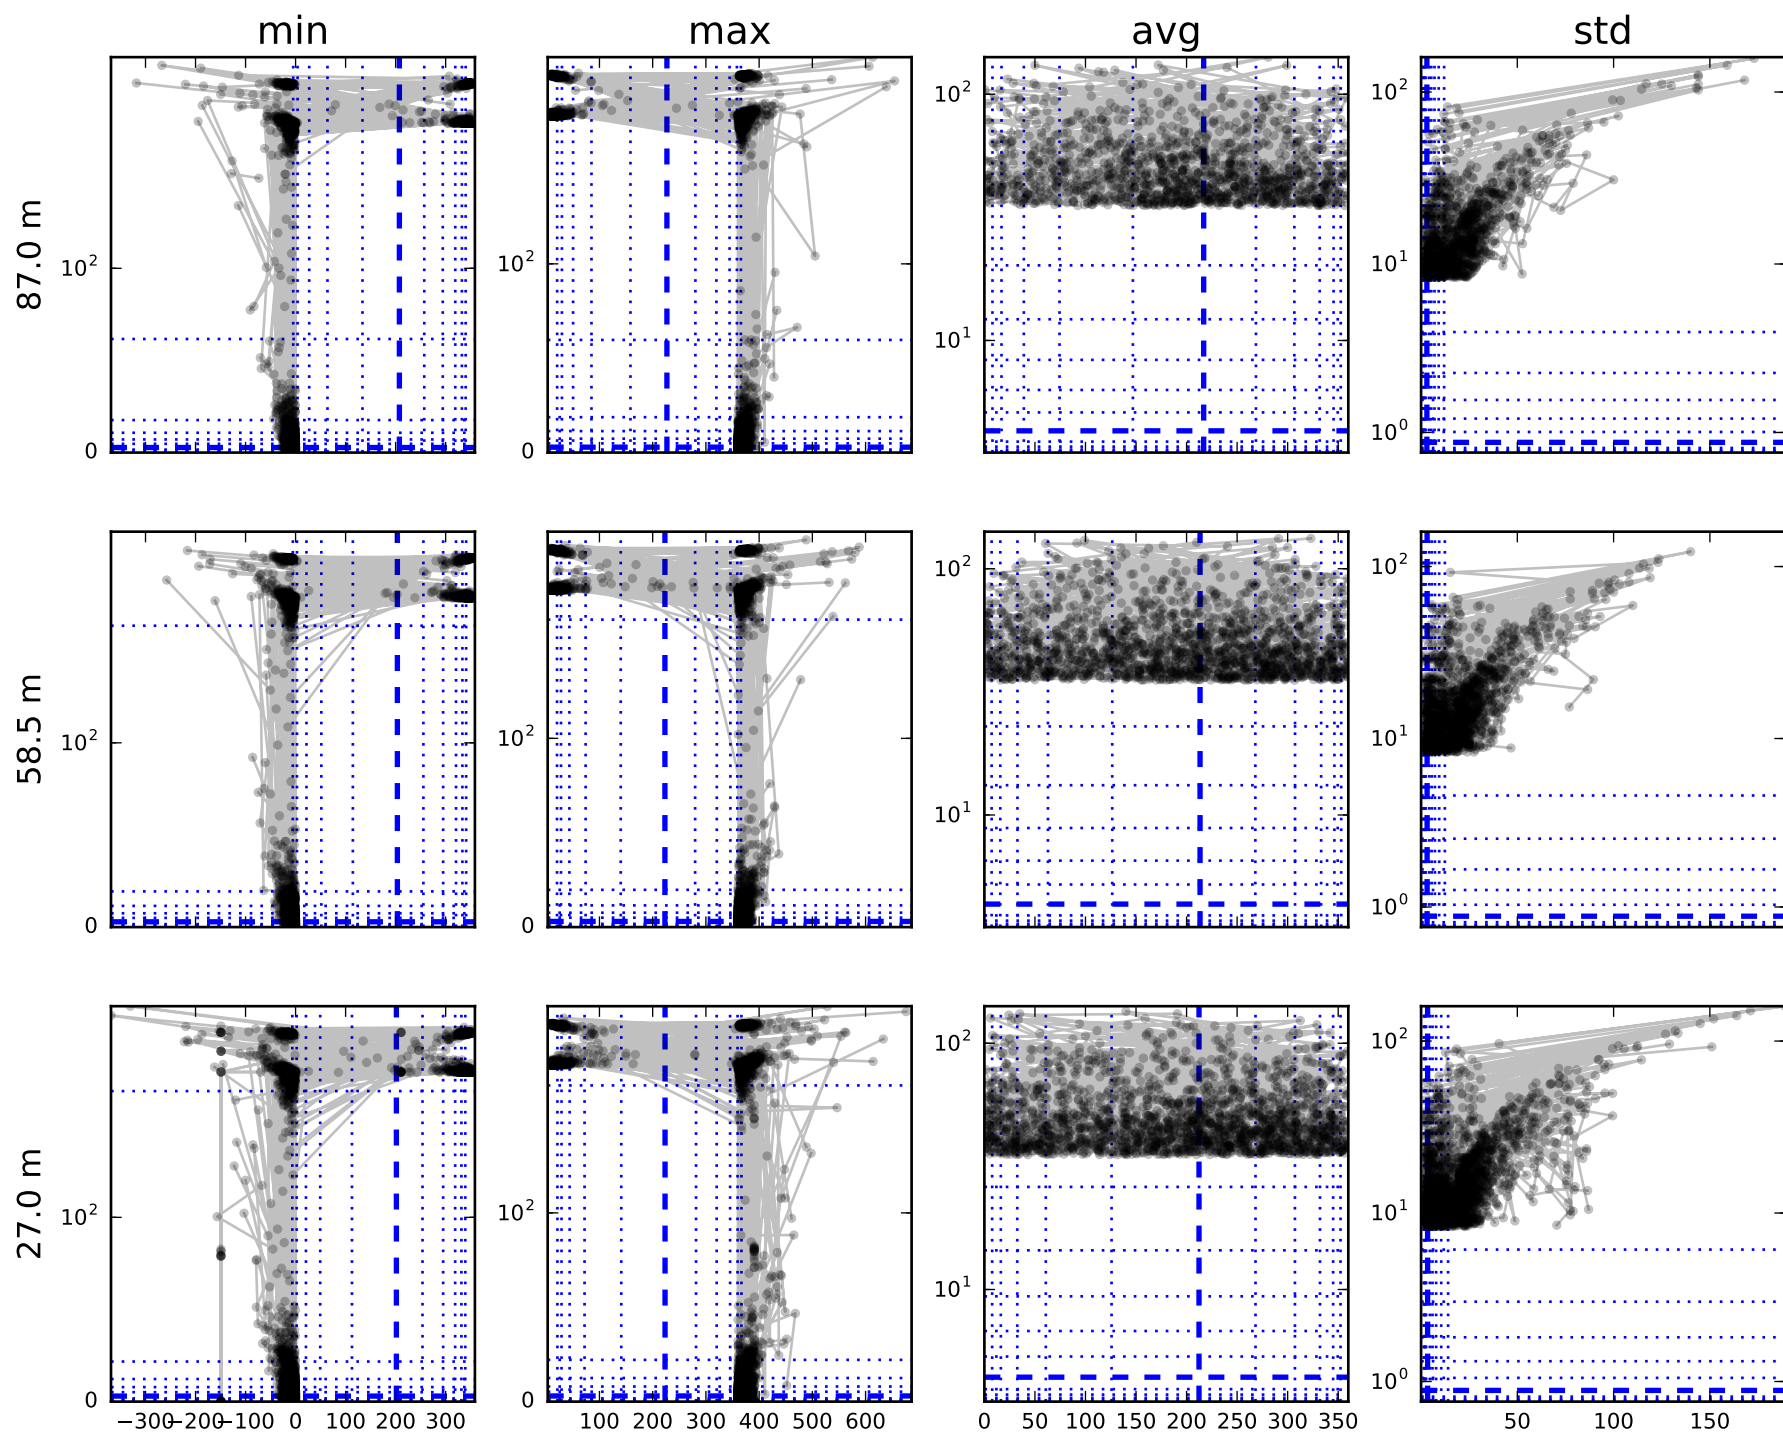

Supplement: Supplementary file 34 [file wes-2019-42-supplement.zip]

# MMIJ PD/Prec (precipitation presence)

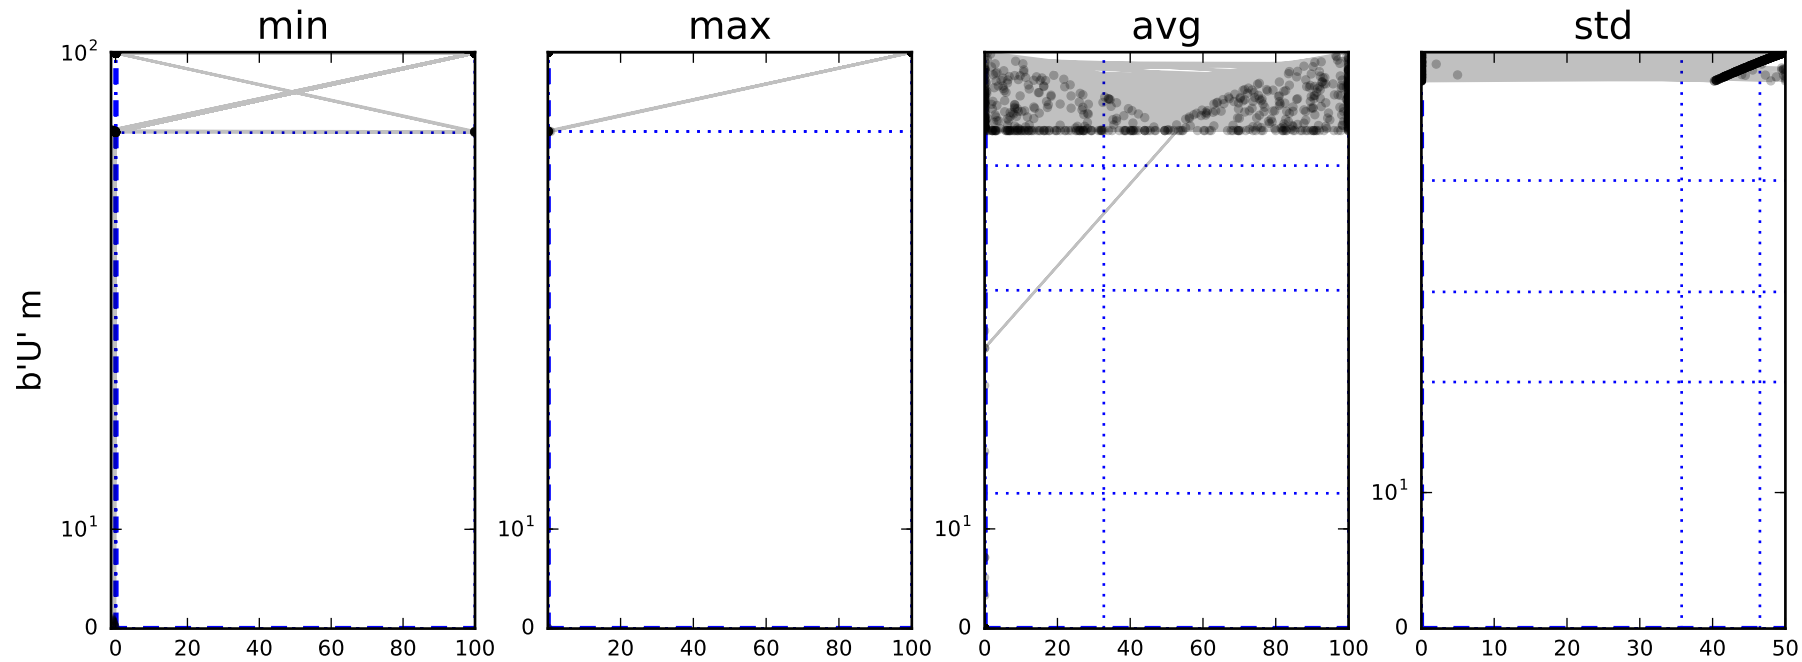

Supplement: Supplementary file 35 [file wes-2019-42-supplement.zip]

OWEZ ST/wt (water temperature, units: °C)

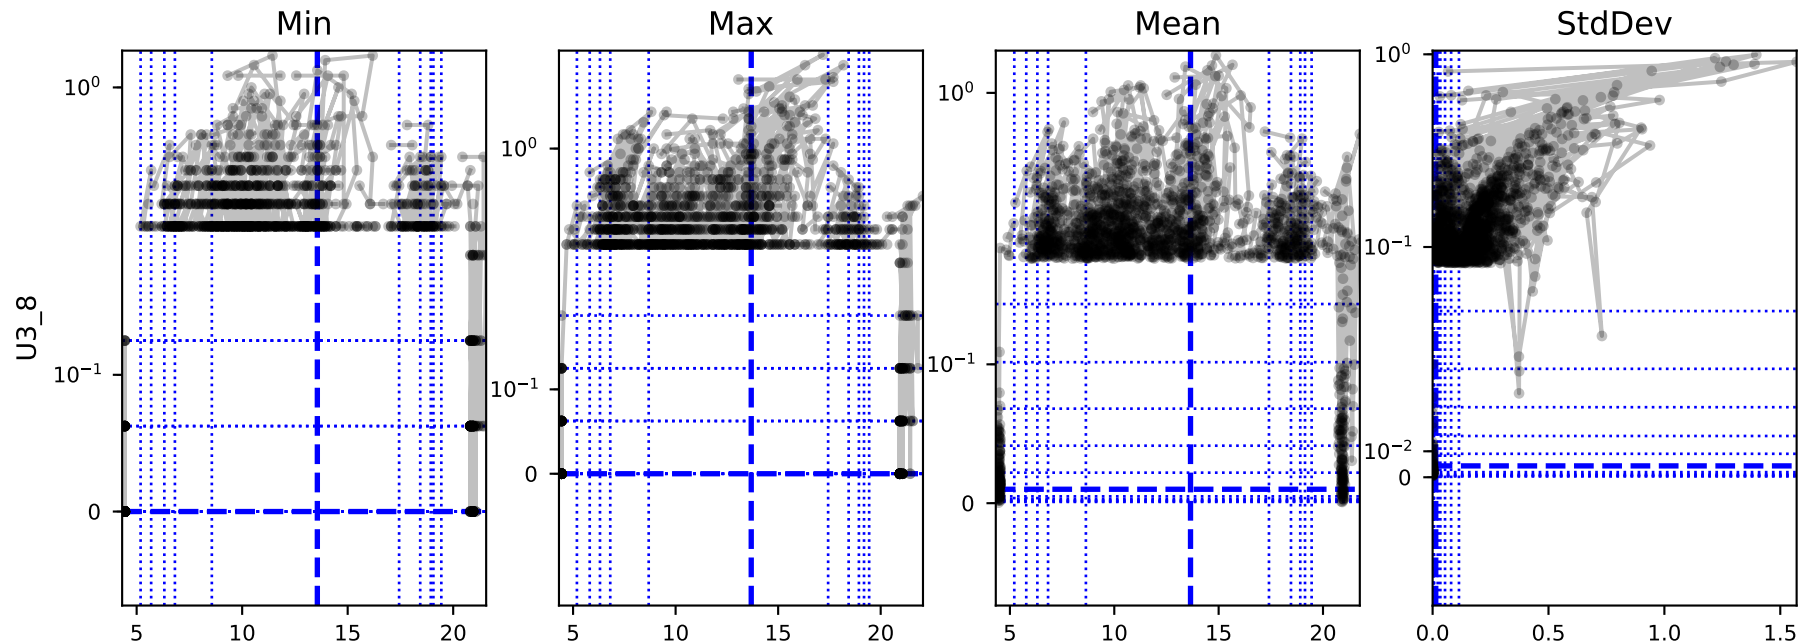

Supplement: Supplementary file 36 [file wes-2019-42-supplement.zip]

MMIJ PM/qual (momentaneous measurement quality, units: %)

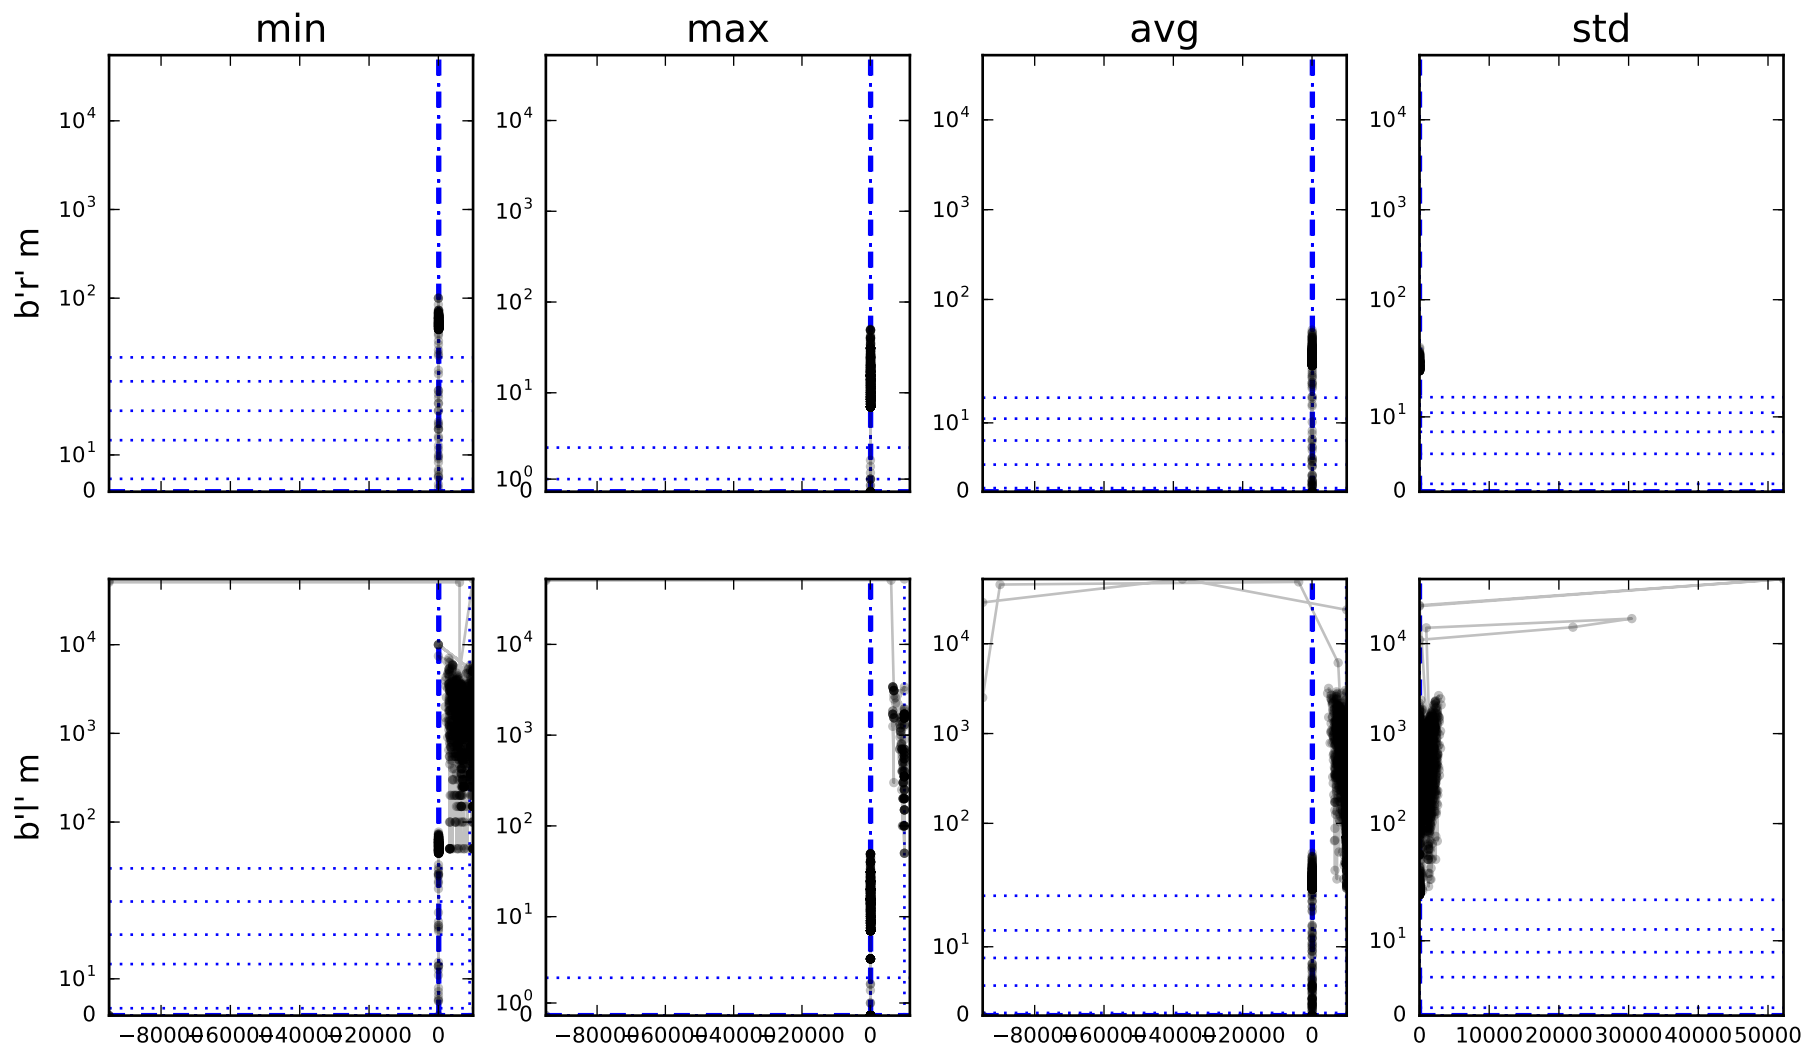

Supplement: Supplementary file 37 [file wes-2019-42-supplement.zip]

# MMIJ PM/visib (visibility distance, units: m)

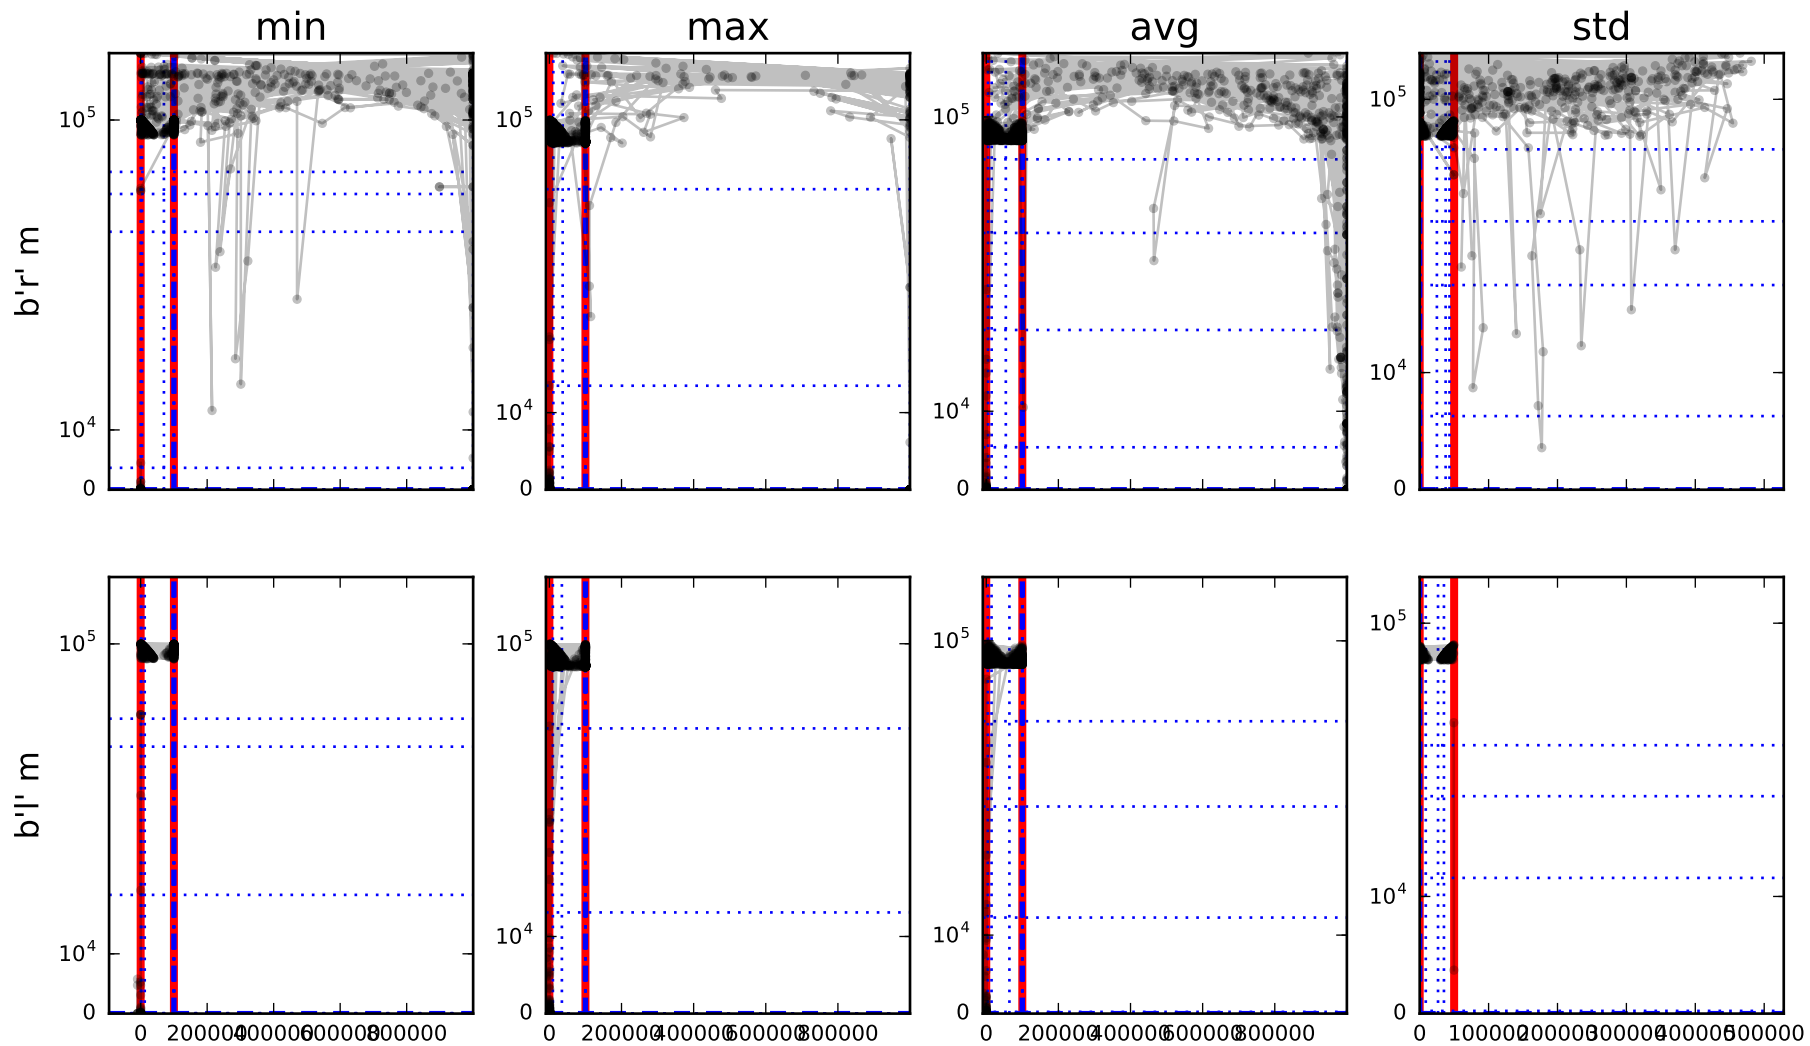

Supplement: Supplementary file 38 [file wes-2019-42-supplement.zip]

FINO1 PYR/Gs (global radiation, units: W/m²)

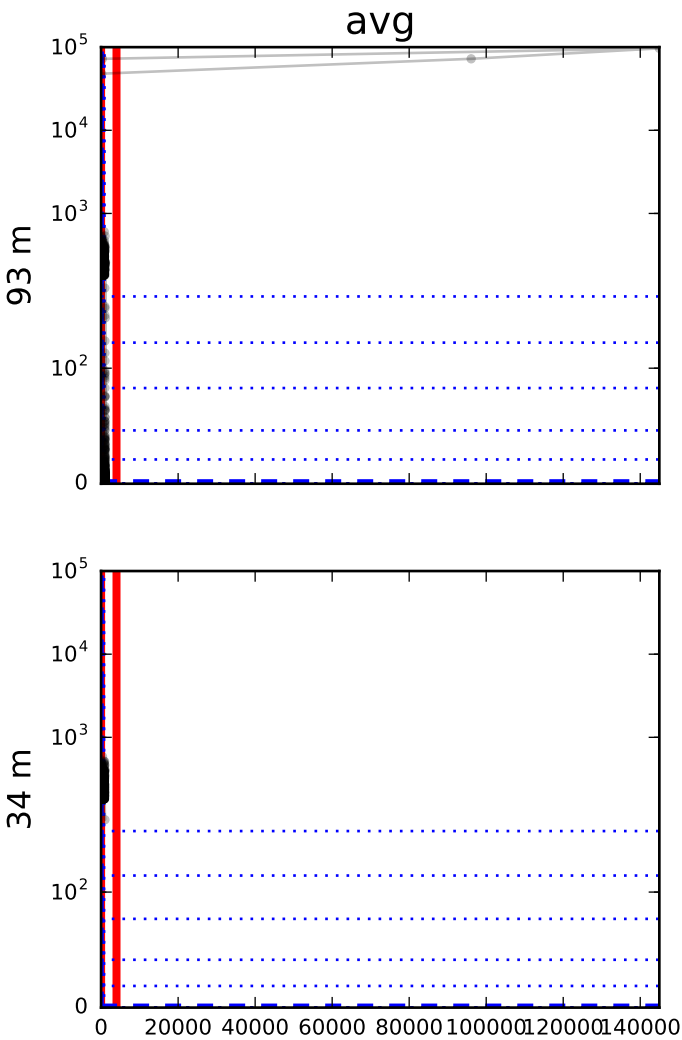

Supplement: Supplementary file 39 [file wes-2019-42-supplement.zip]

MMIJ PTB/Pair (air pressure, units: hPa)

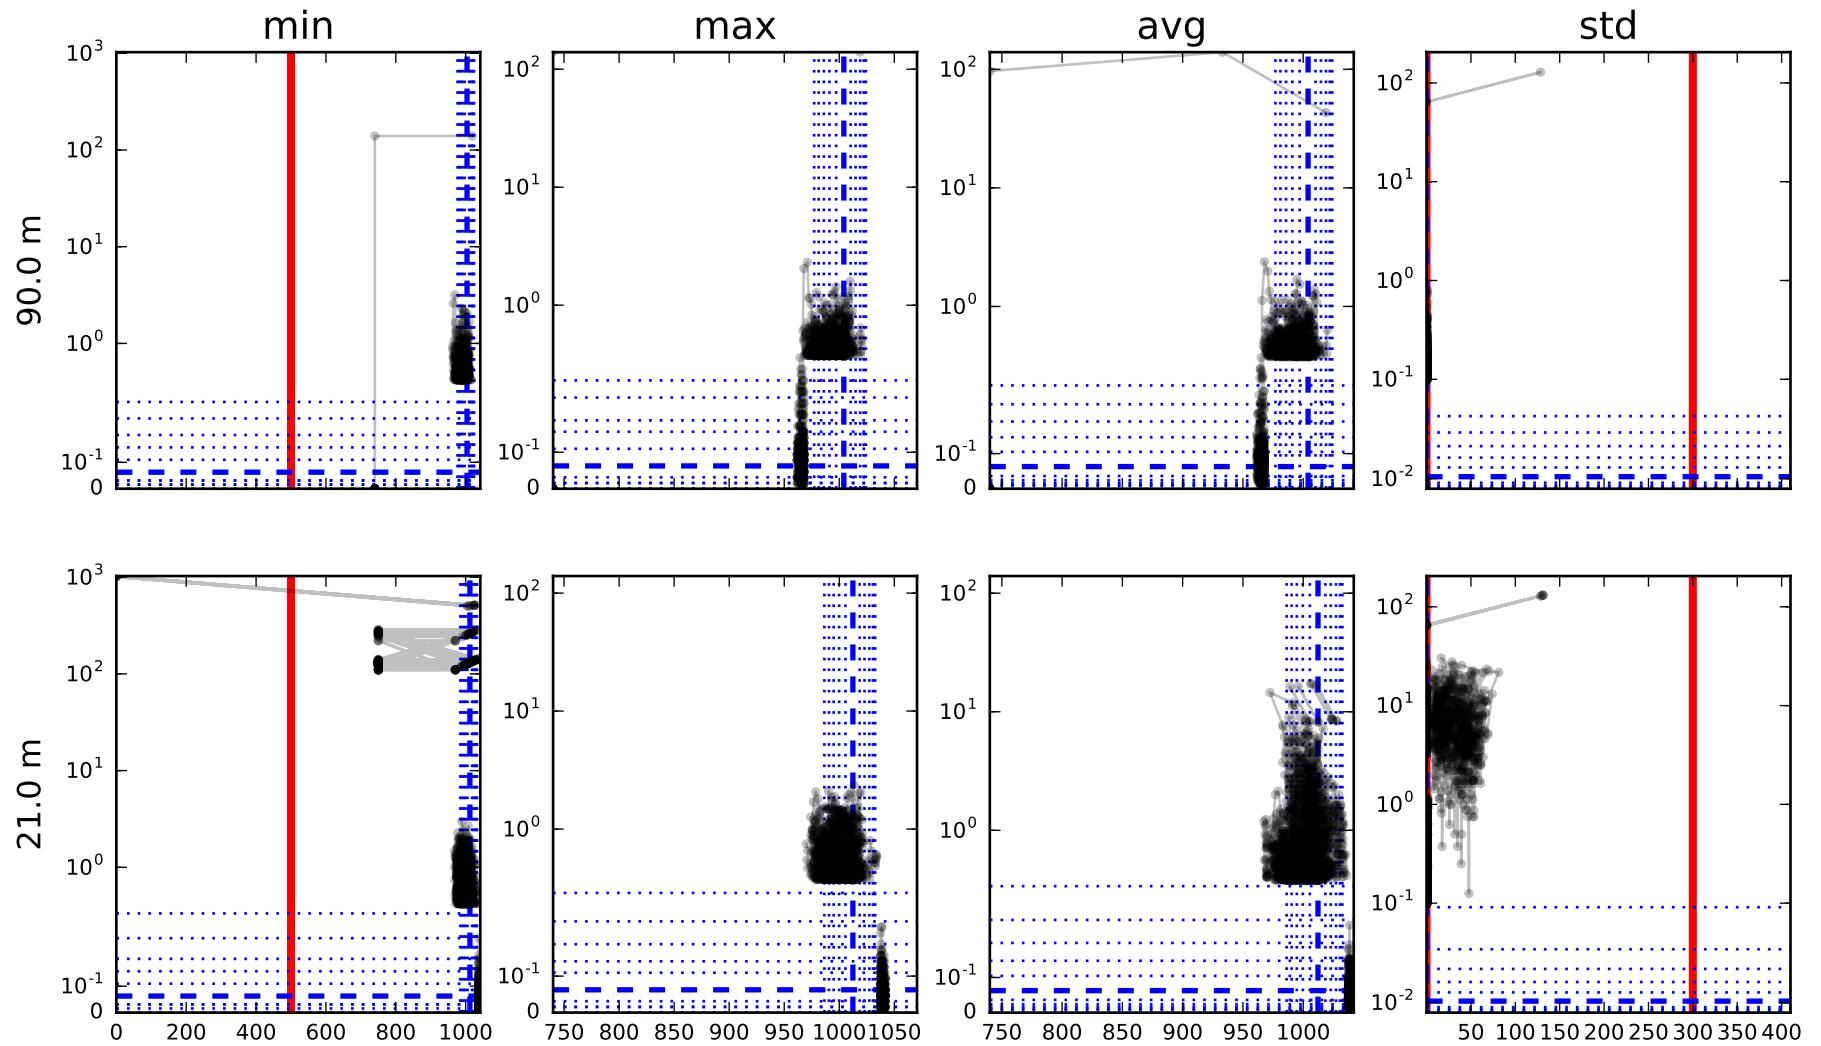

Supplement: Supplementary file 40 [file wes-2019-42-supplement.zip]

MMIJ WV/Wd (wind direction, units: °)

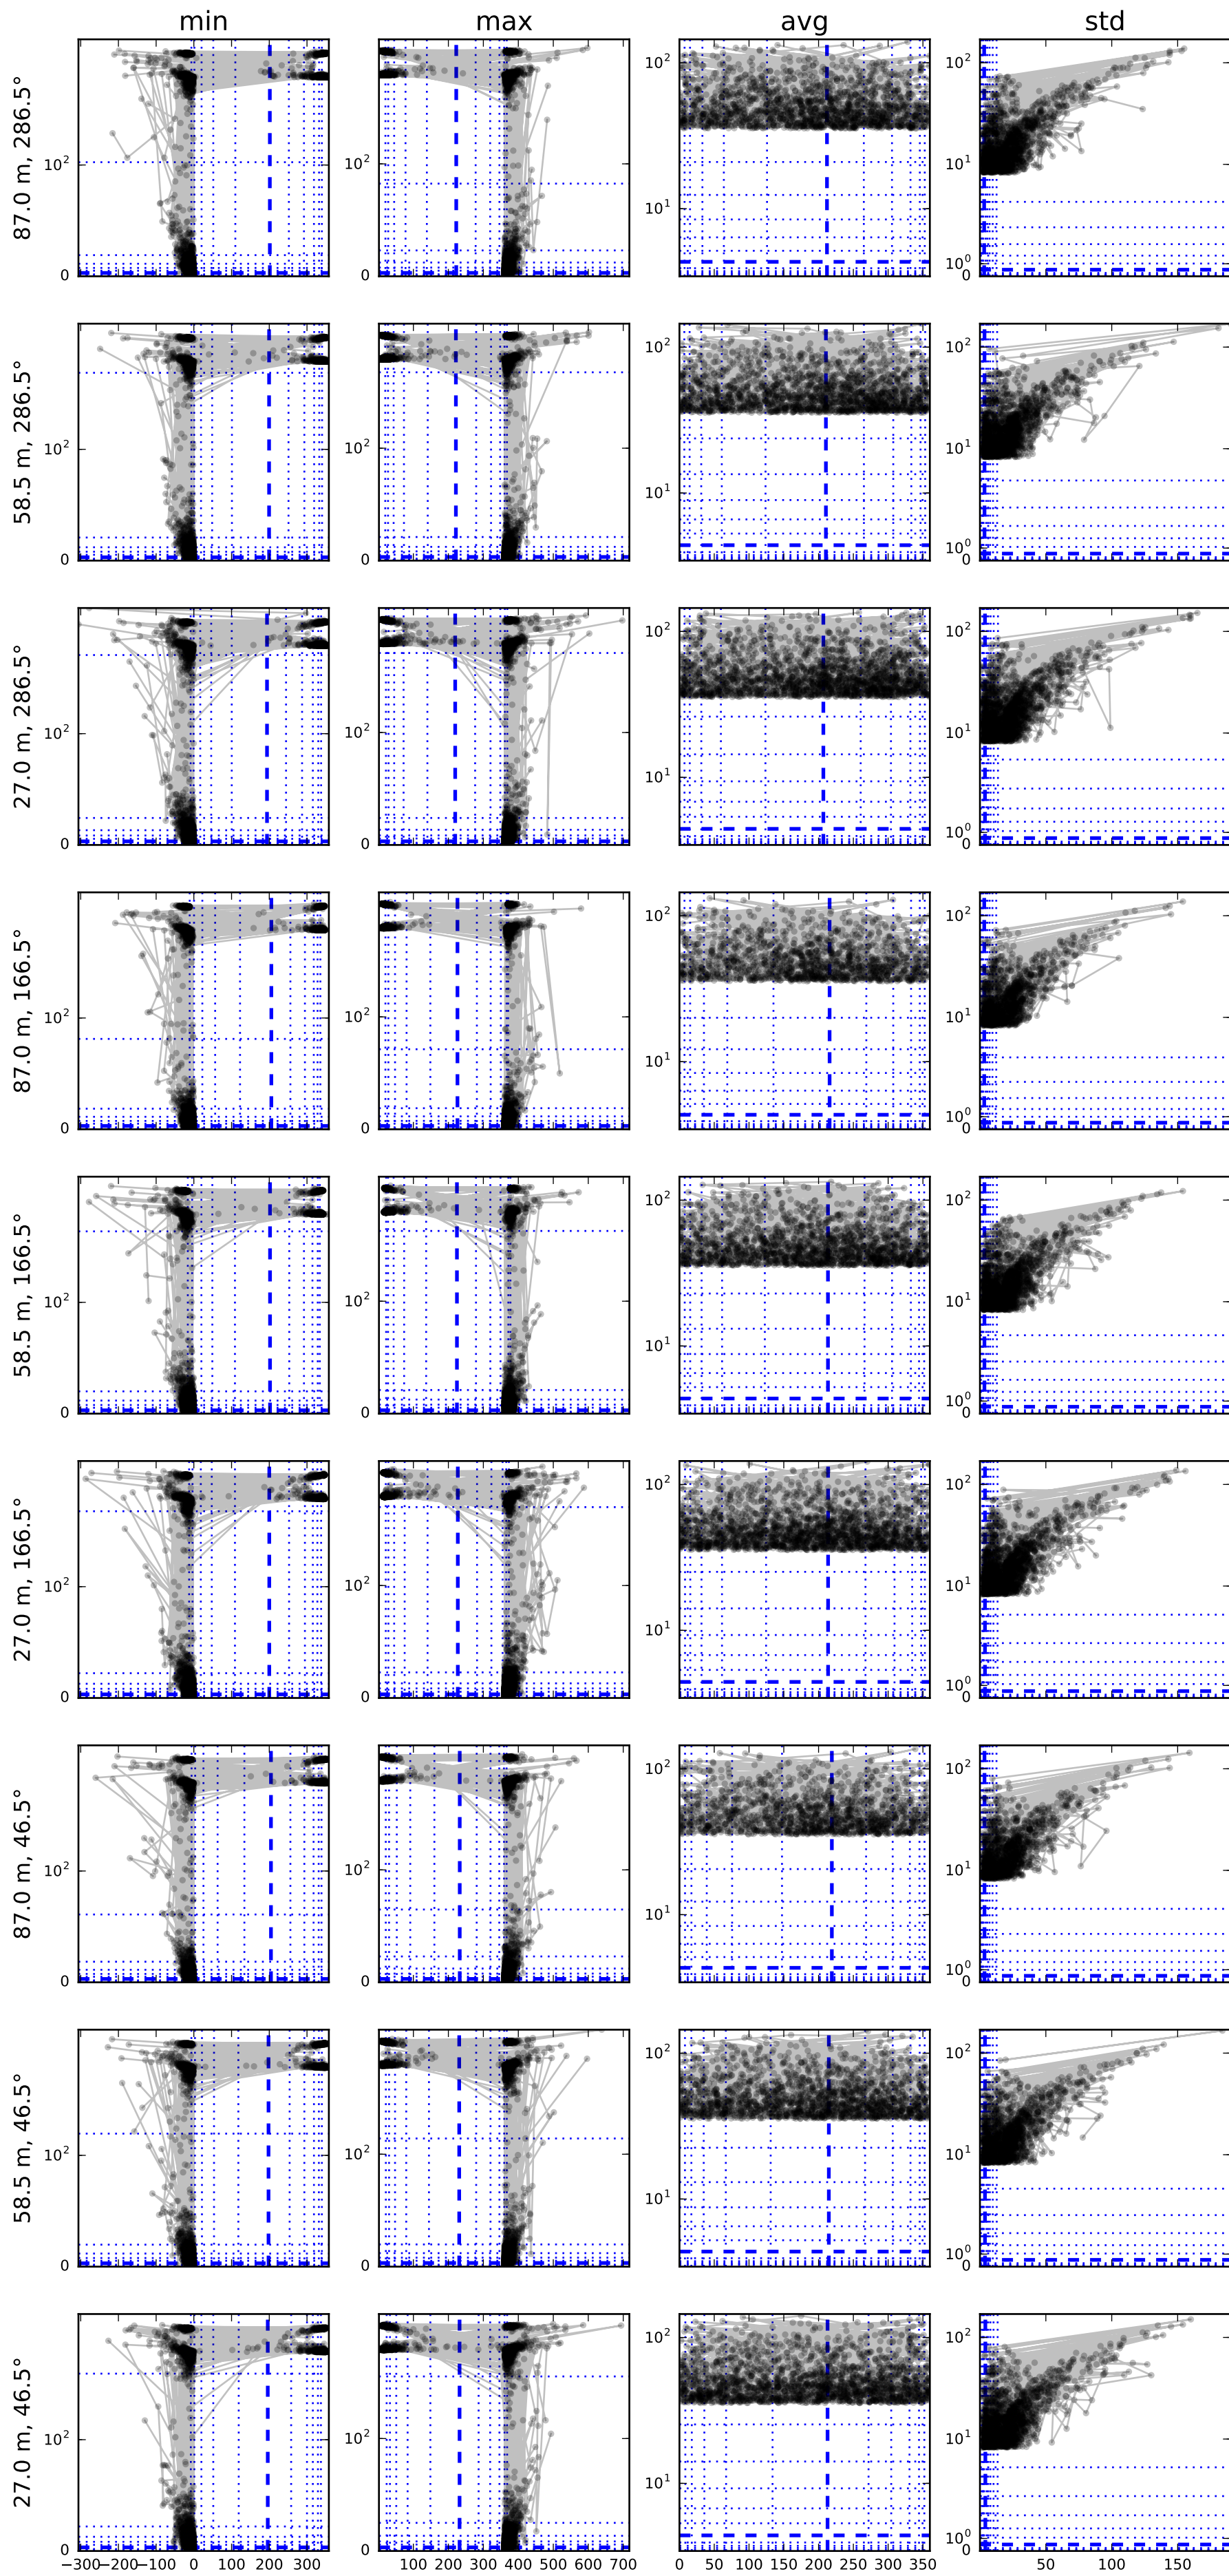

Supplement: Supplementary file 41 [file wes-2019-42-supplement.zip]

FINO1 HTT/Lt (air temperature, units: °C)

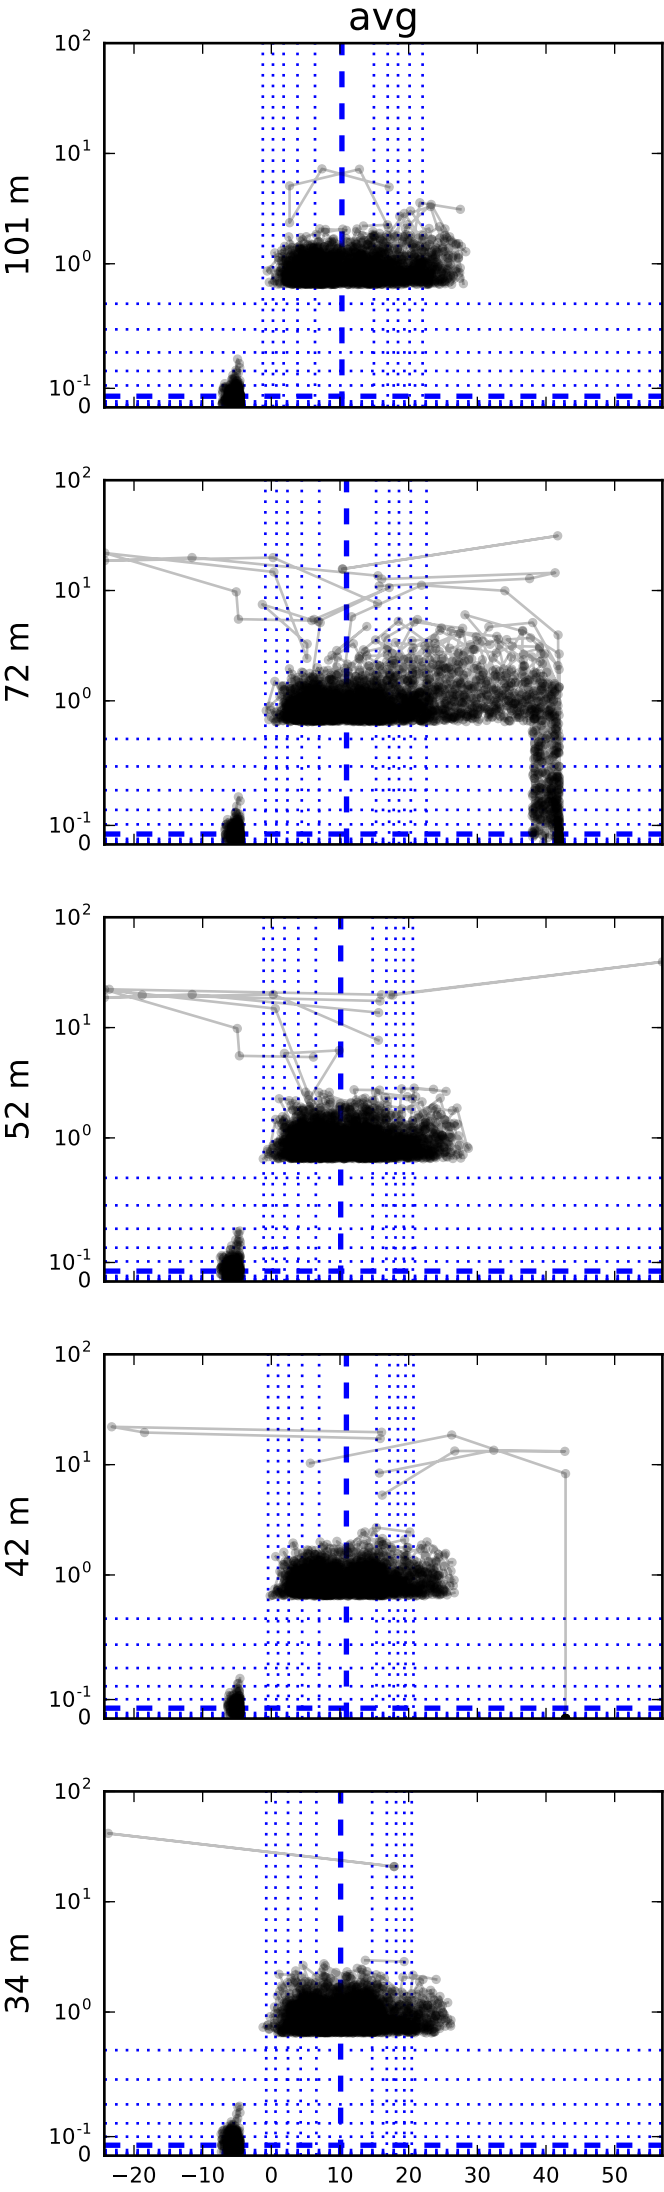

Supplement: Supplementary file 42 [file wes-2019-42-supplement.zip]

# MMIJ PM/OK (sensor status, units: %)

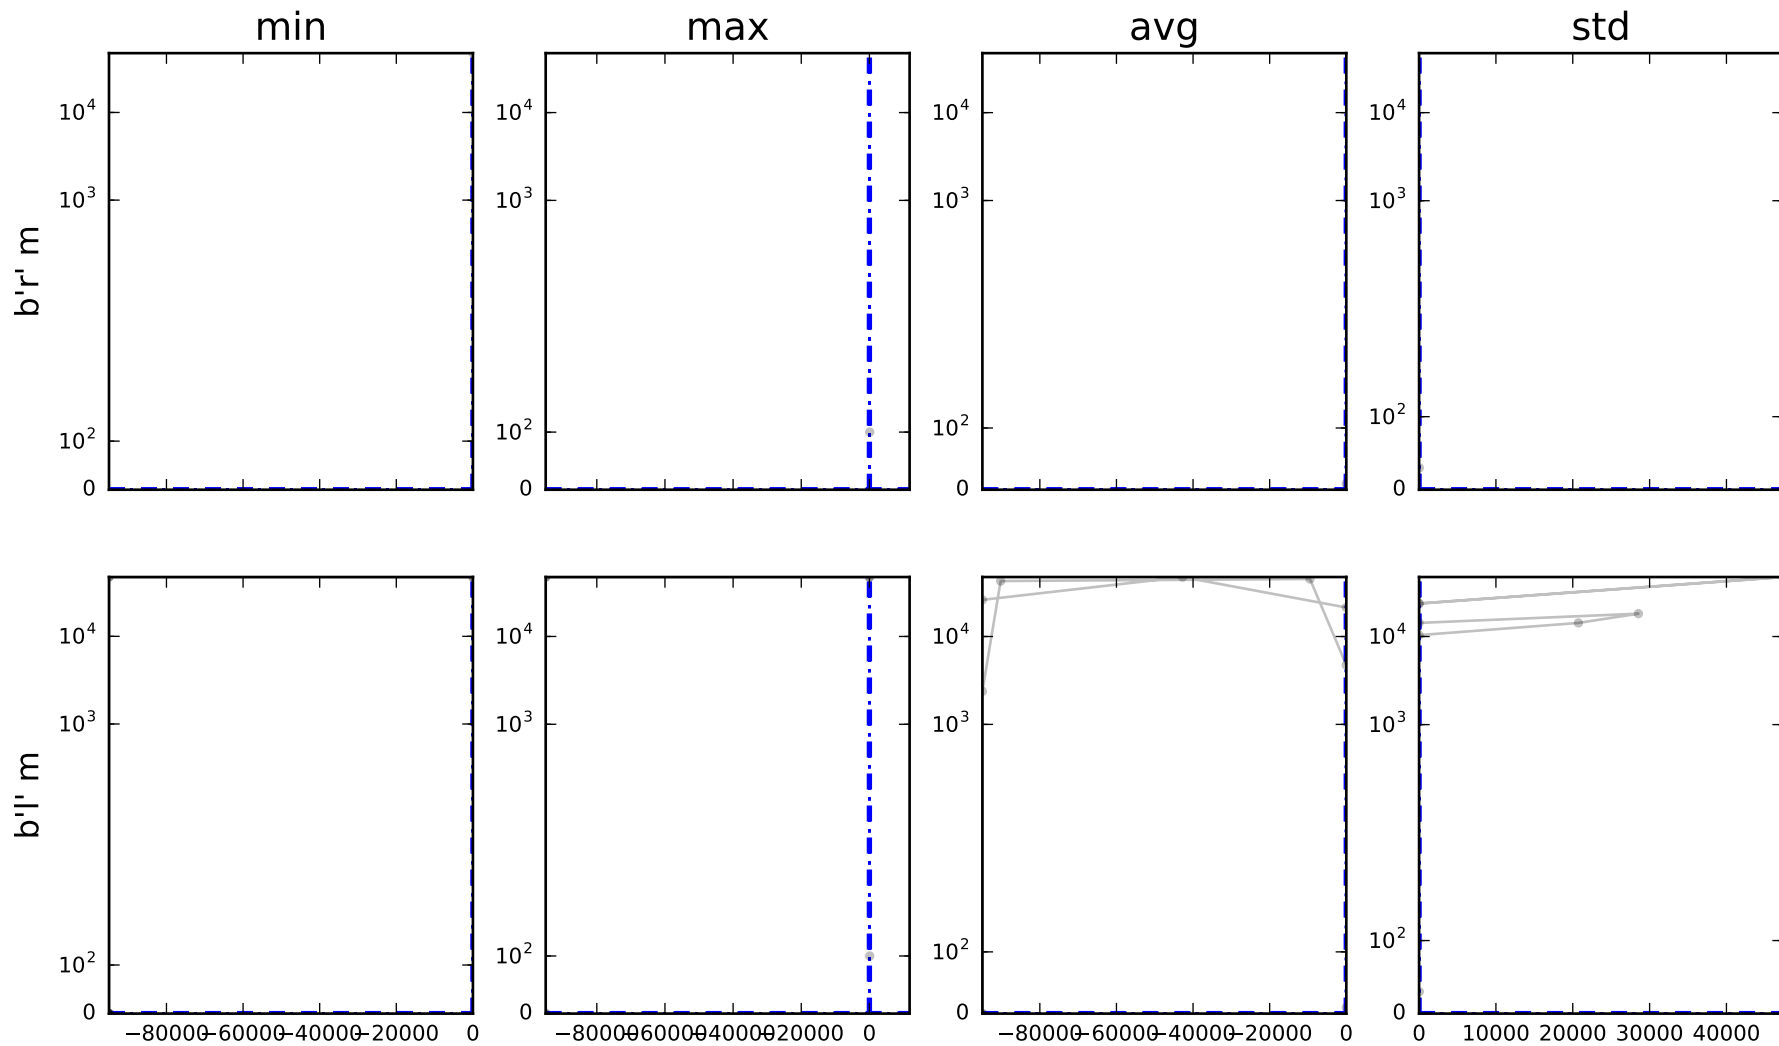

Supplement: Supplementary file 43 [file wes-2019-42-supplement.zip]

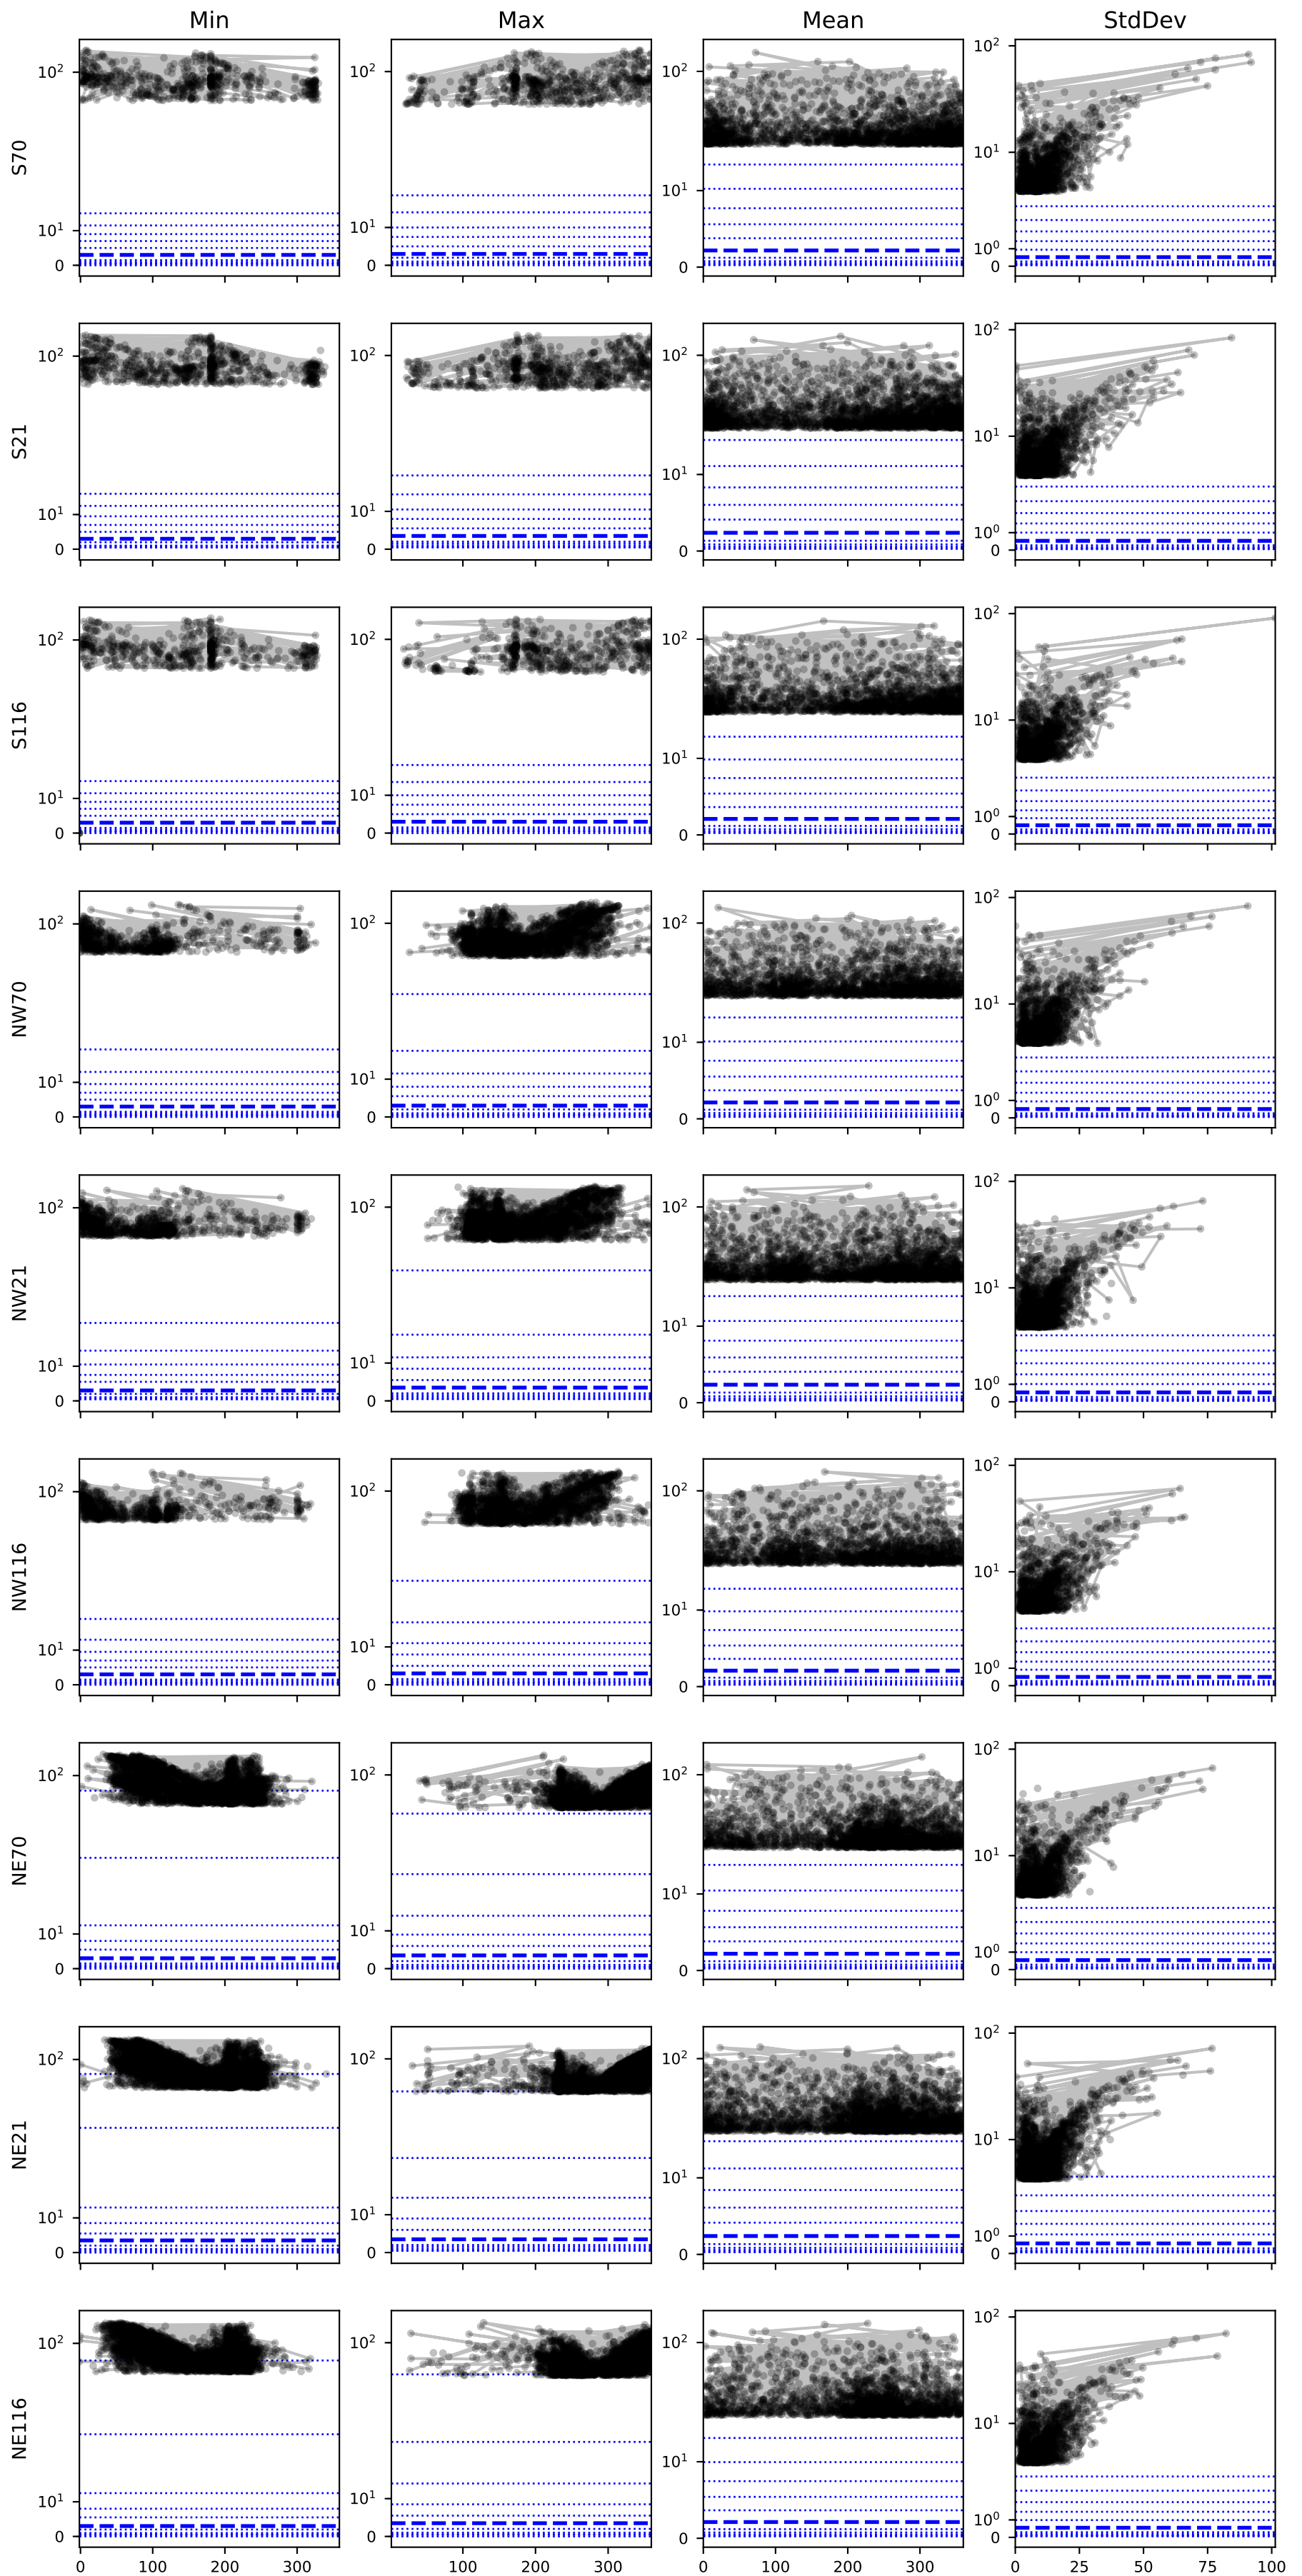

Supplement: Supplementary file 44 [file wes-2019-42-supplement.zip]

OWEZ AWAC/cv7 (current velocity 7 m, units: m/s)

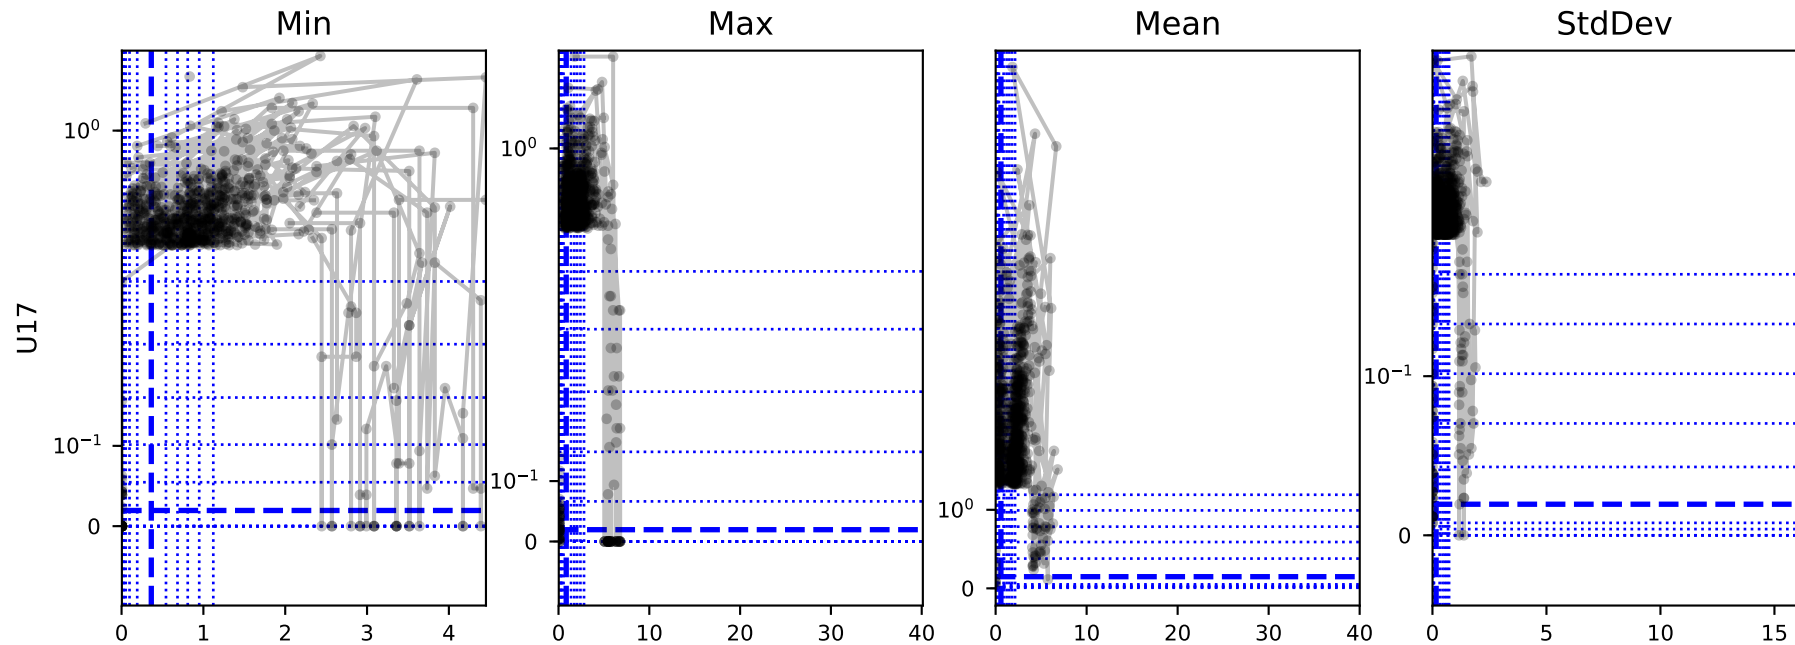

Supplement: Supplementary file 45 [file wes-2019-42-supplement.zip]

OWEZ AWAC/vd (wave direction, units: °)

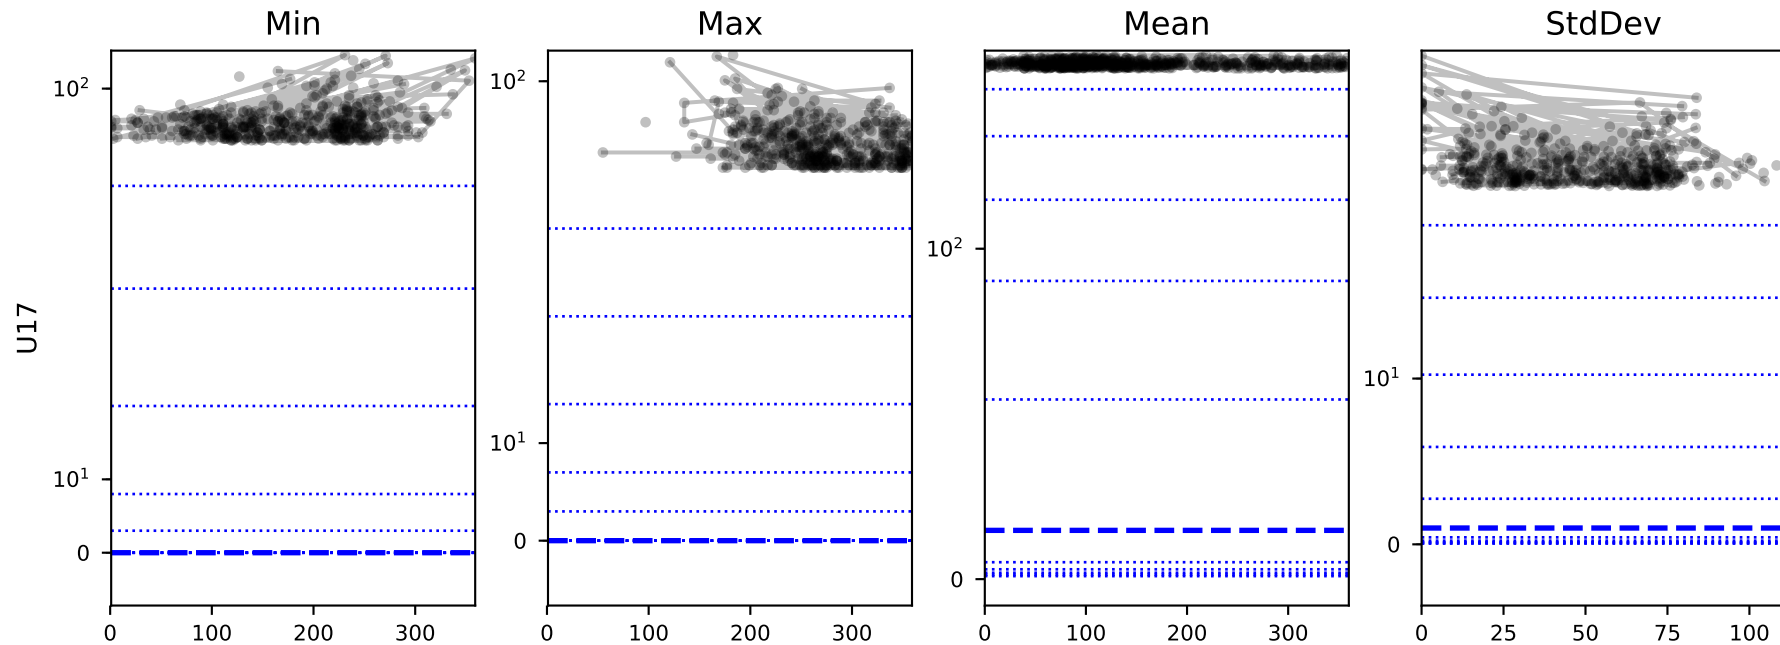

Supplement: Supplementary file 46 [file wes-2019-42-supplement.zip]

MMIJ USA/WsXSon (wind speed X, units: m/s)

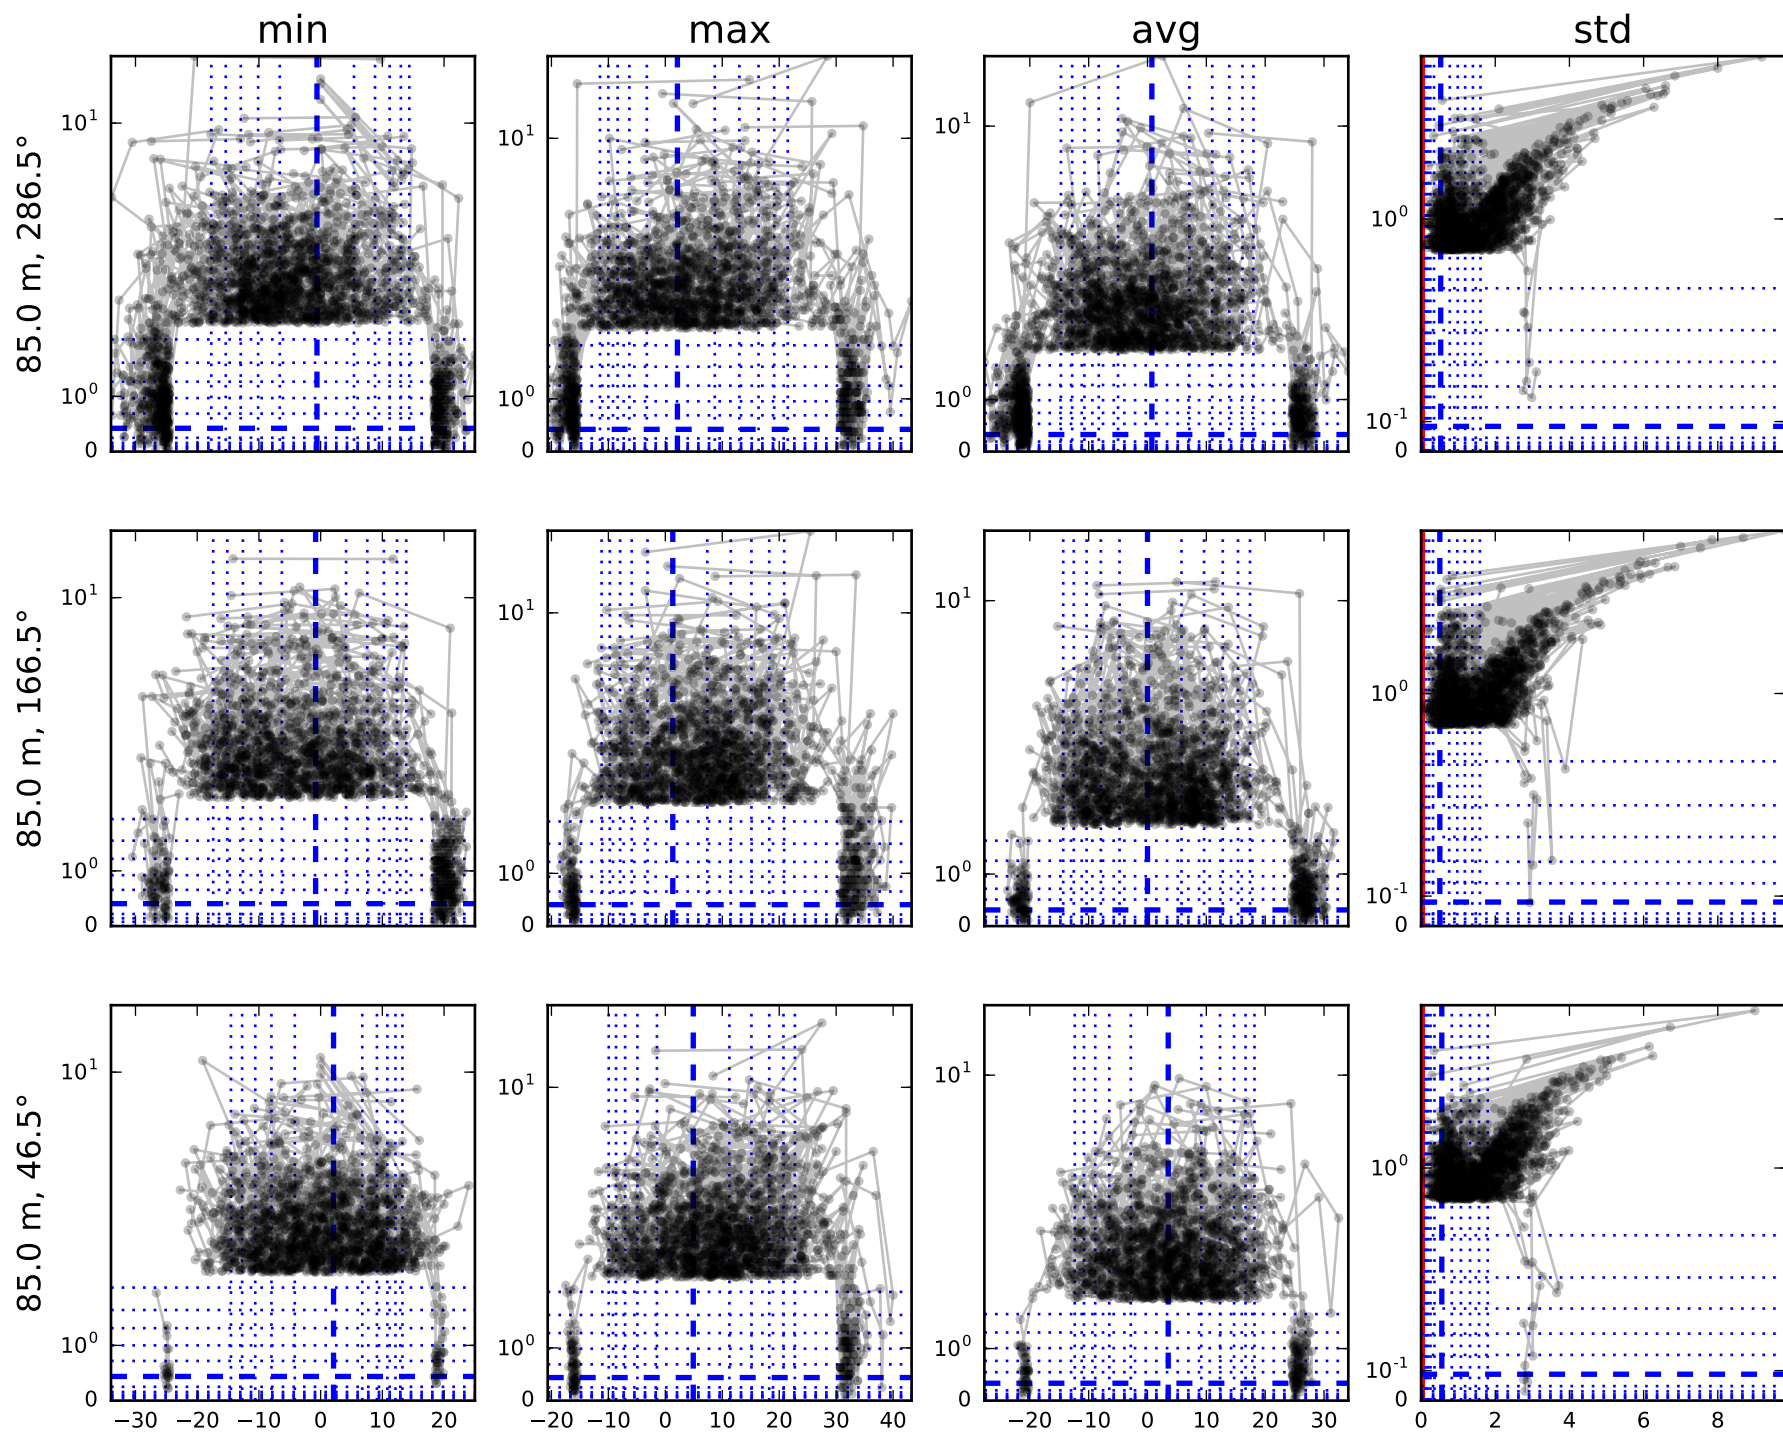

Supplement: Supplementary file 47 [file wes-2019-42-supplement.zip]

OWEZ WM/hws (horizontal wind speed, units: m/s)

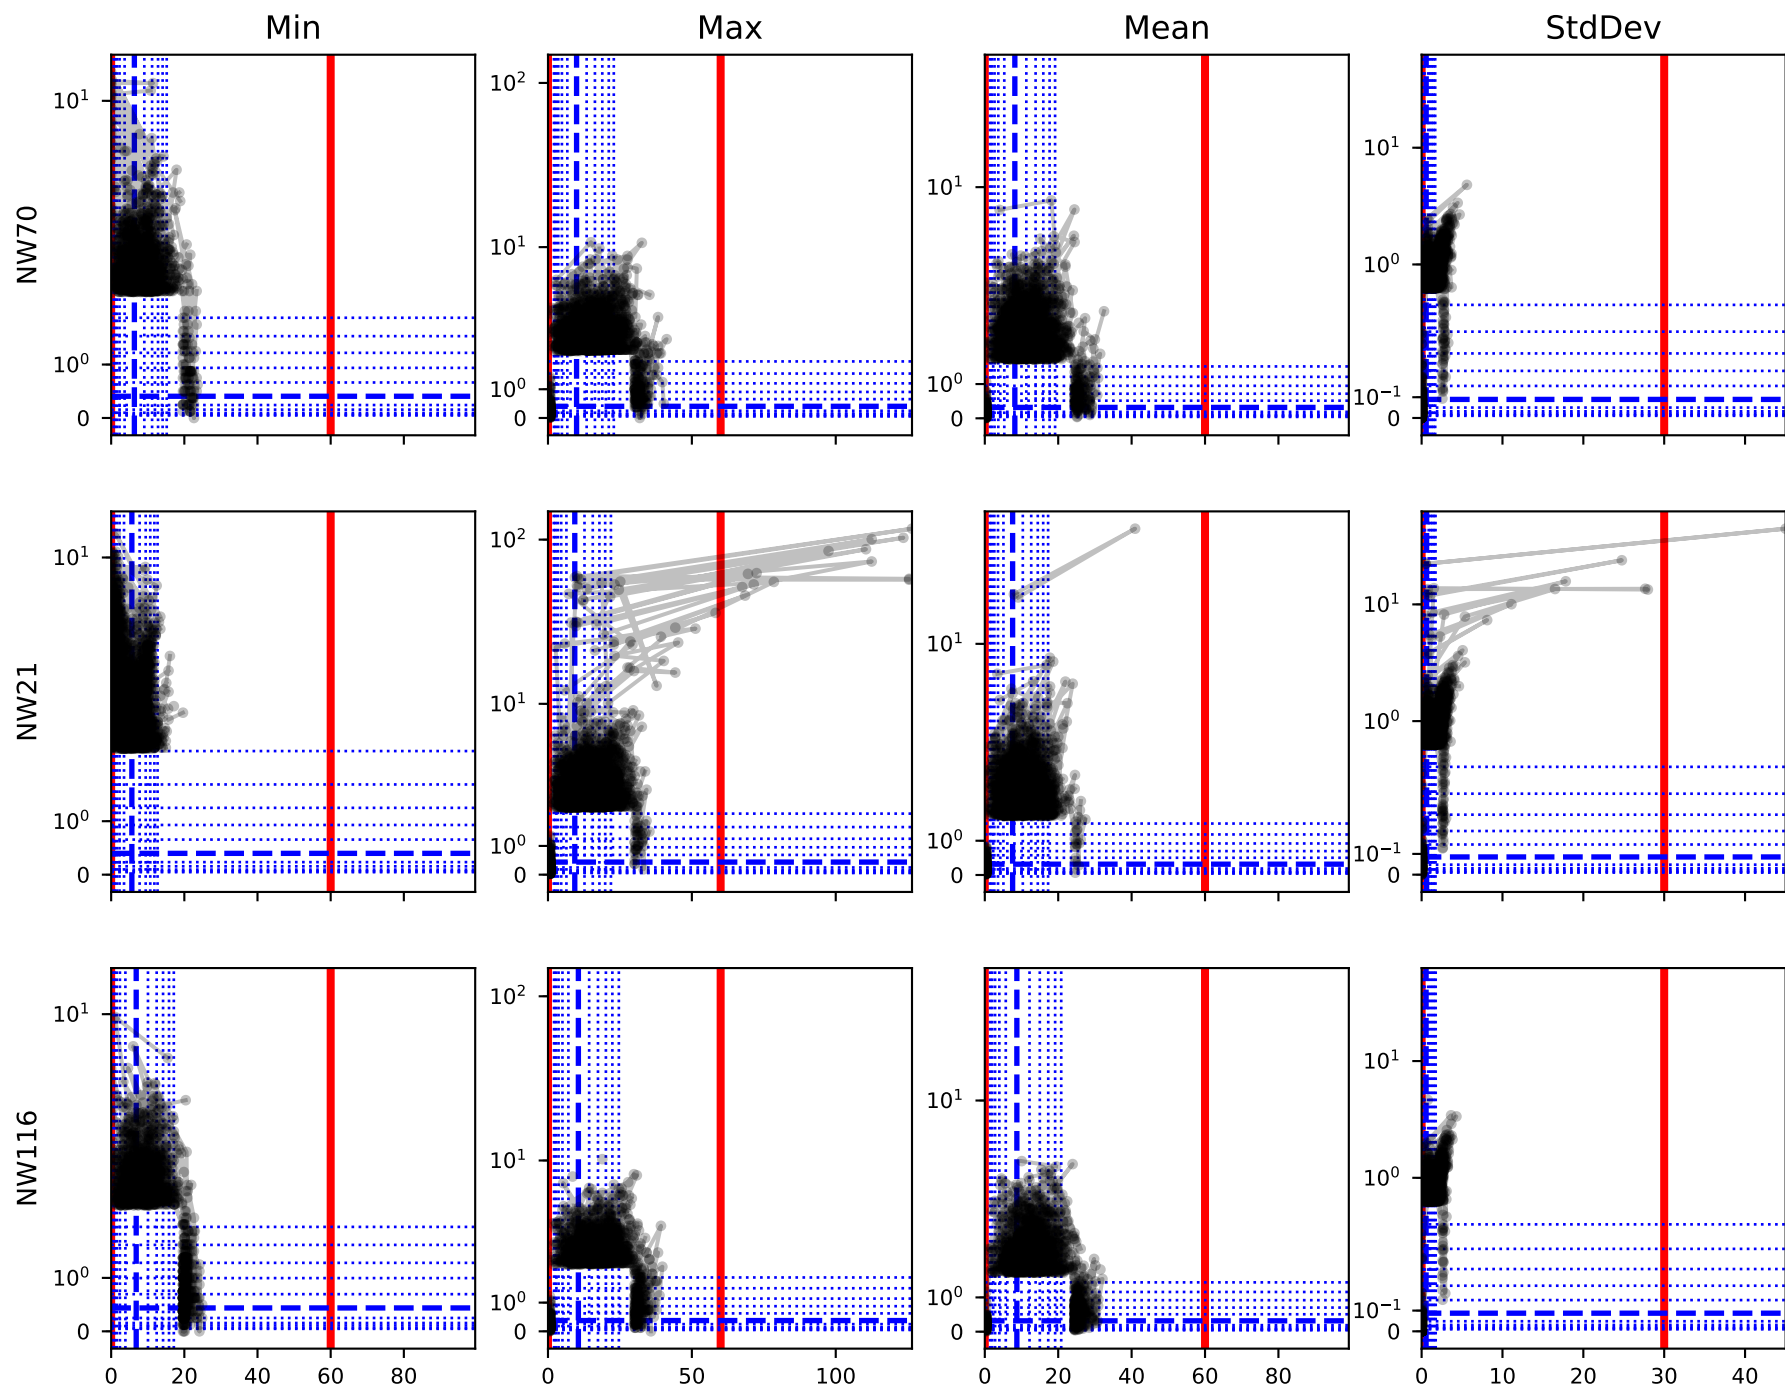

Supplement: Supplementary file 48 [file wes-2019-42-supplement.zip]

OWEZ AC/ma (North-South acceleration, units:  $\text{m/s}^2$ )

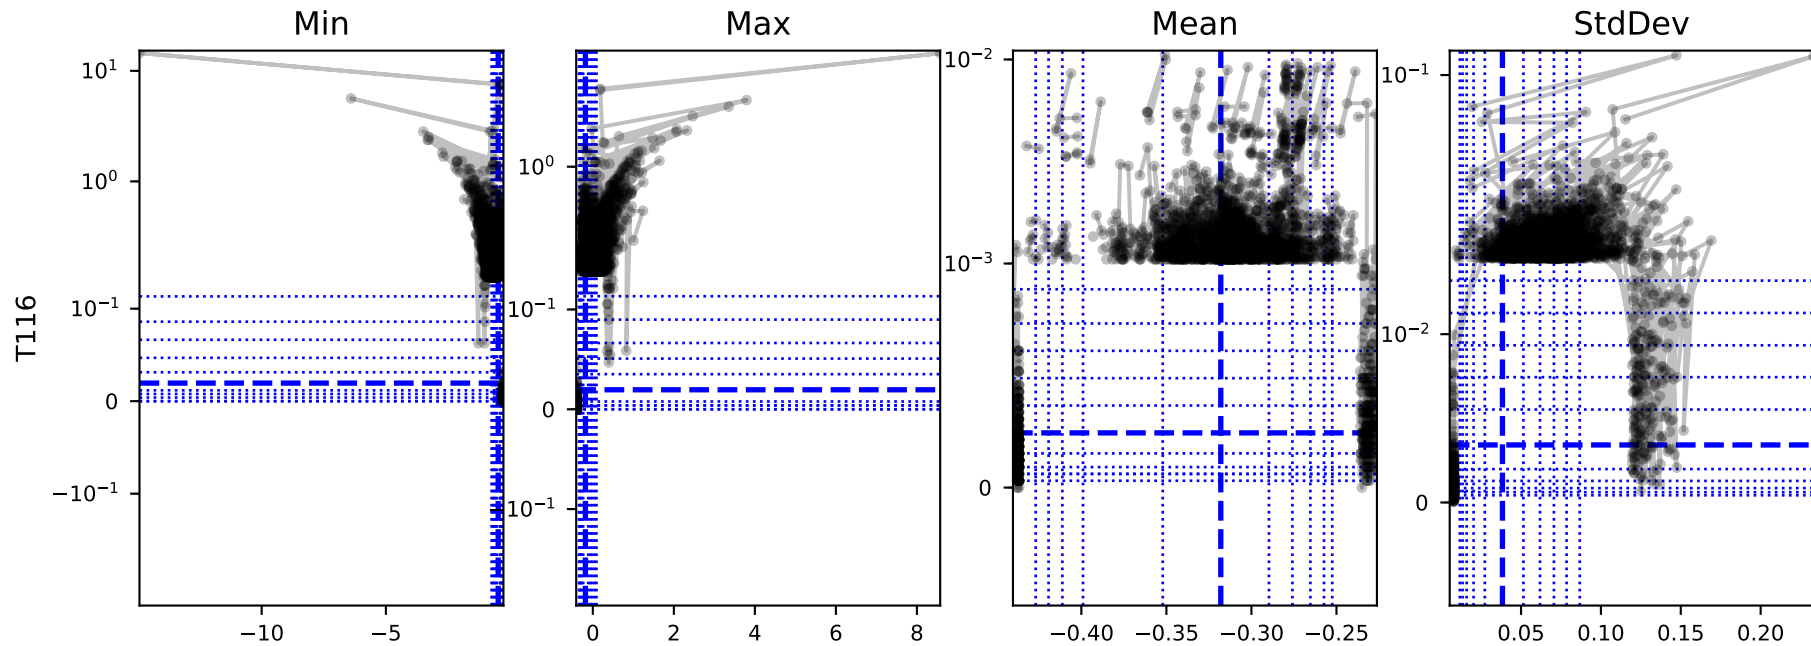

Supplement: Supplementary file 49 [file wes-2019-42-supplement.zip]

FINO1 HTT/Lf (relative humidity, units: %)

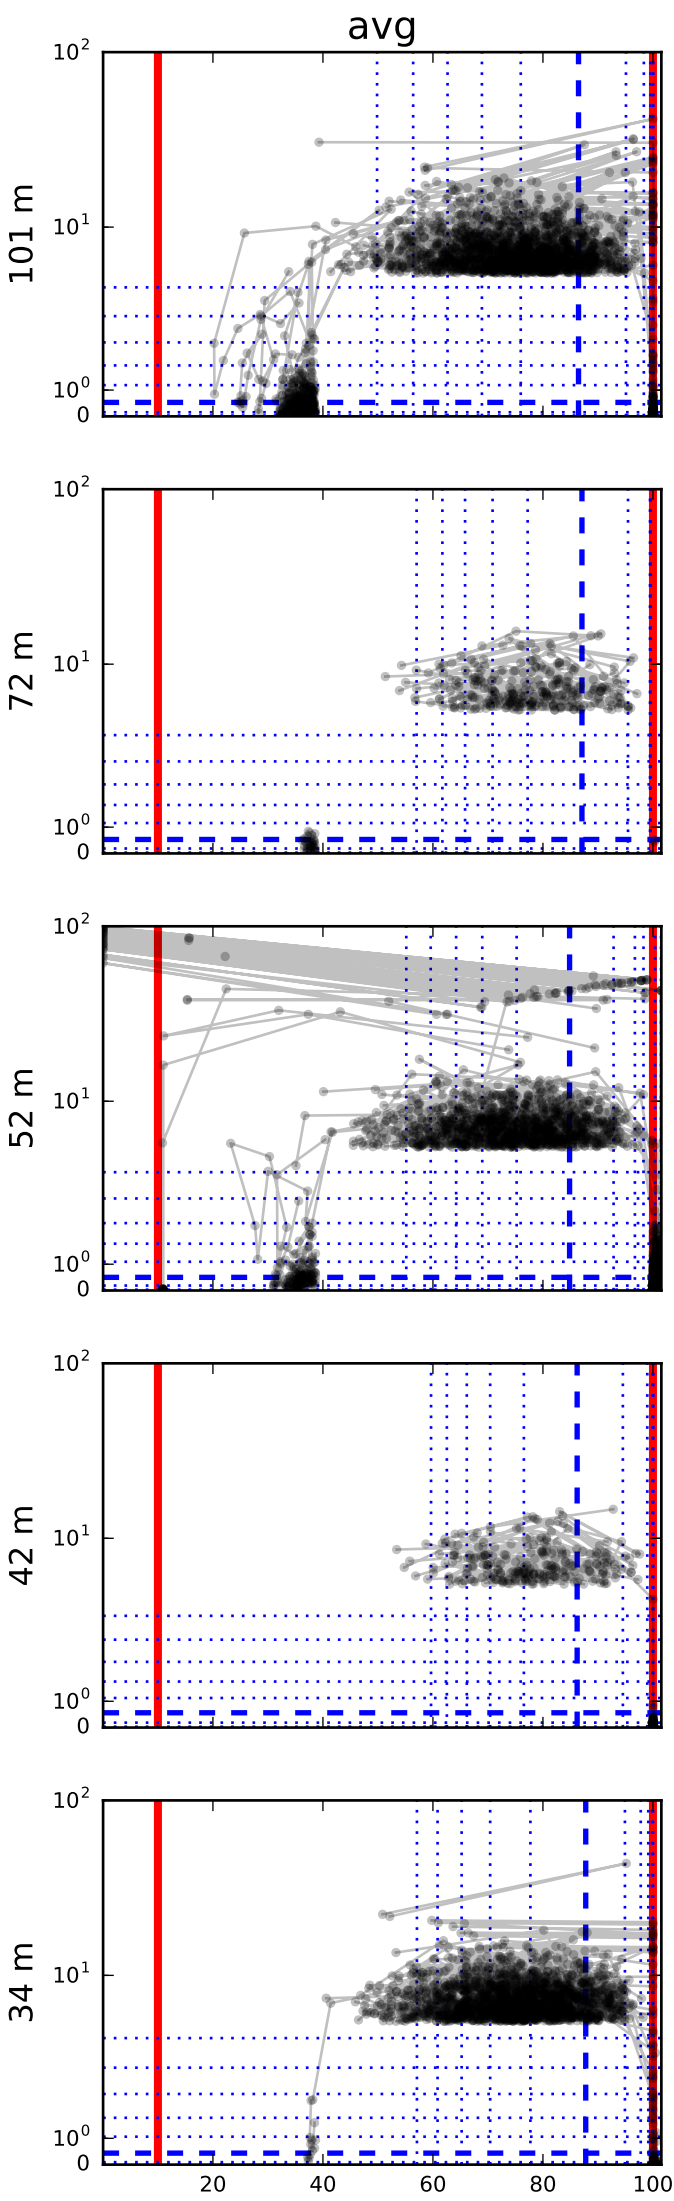

Supplement: Supplementary file 50 [file wes-2019-42-supplement.zip]

# OWEZ AWAC/vh (wave height, units: m)

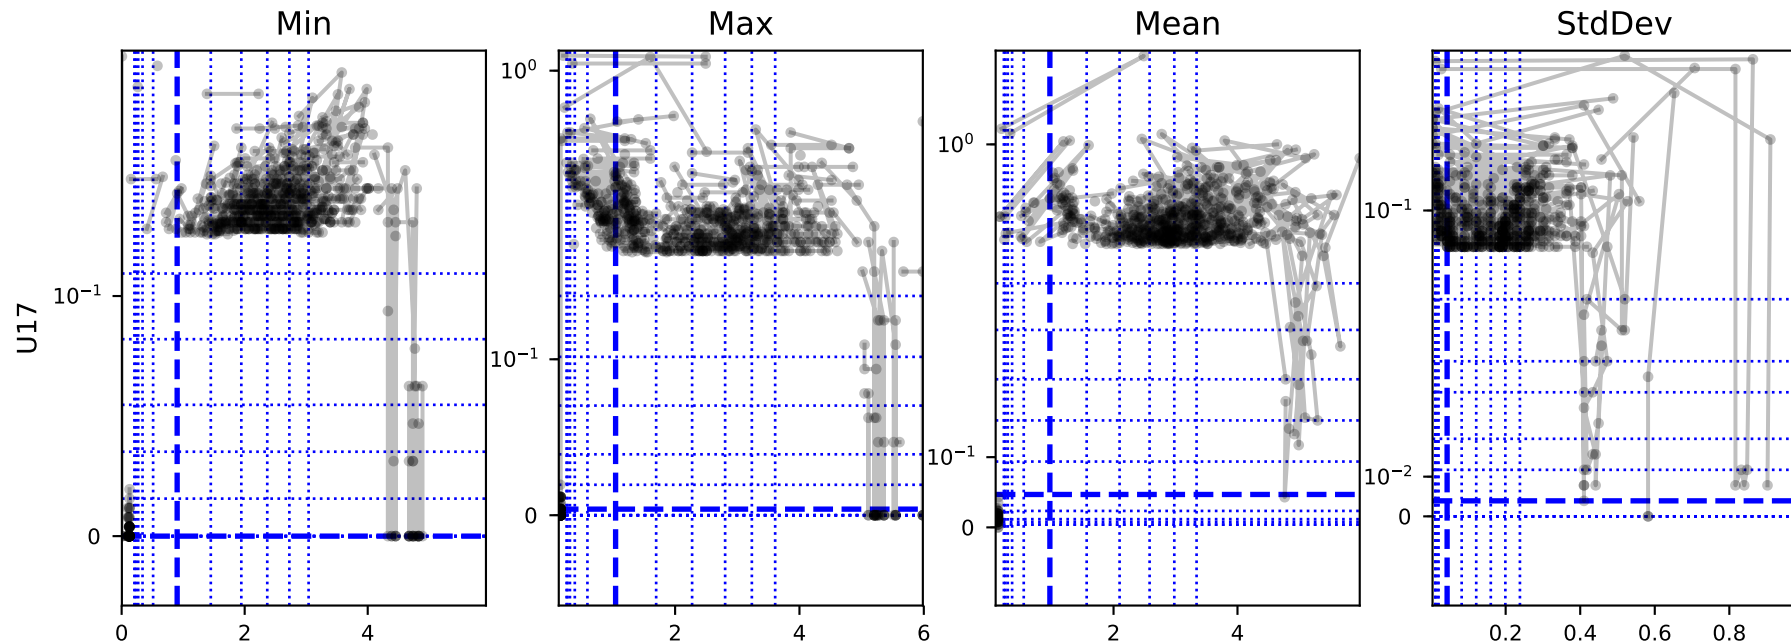

Supplement: Supplementary file 51 [file wes-2019-42-supplement.zip]

MMIJ HMP/Rh (relative humidity, units: %)

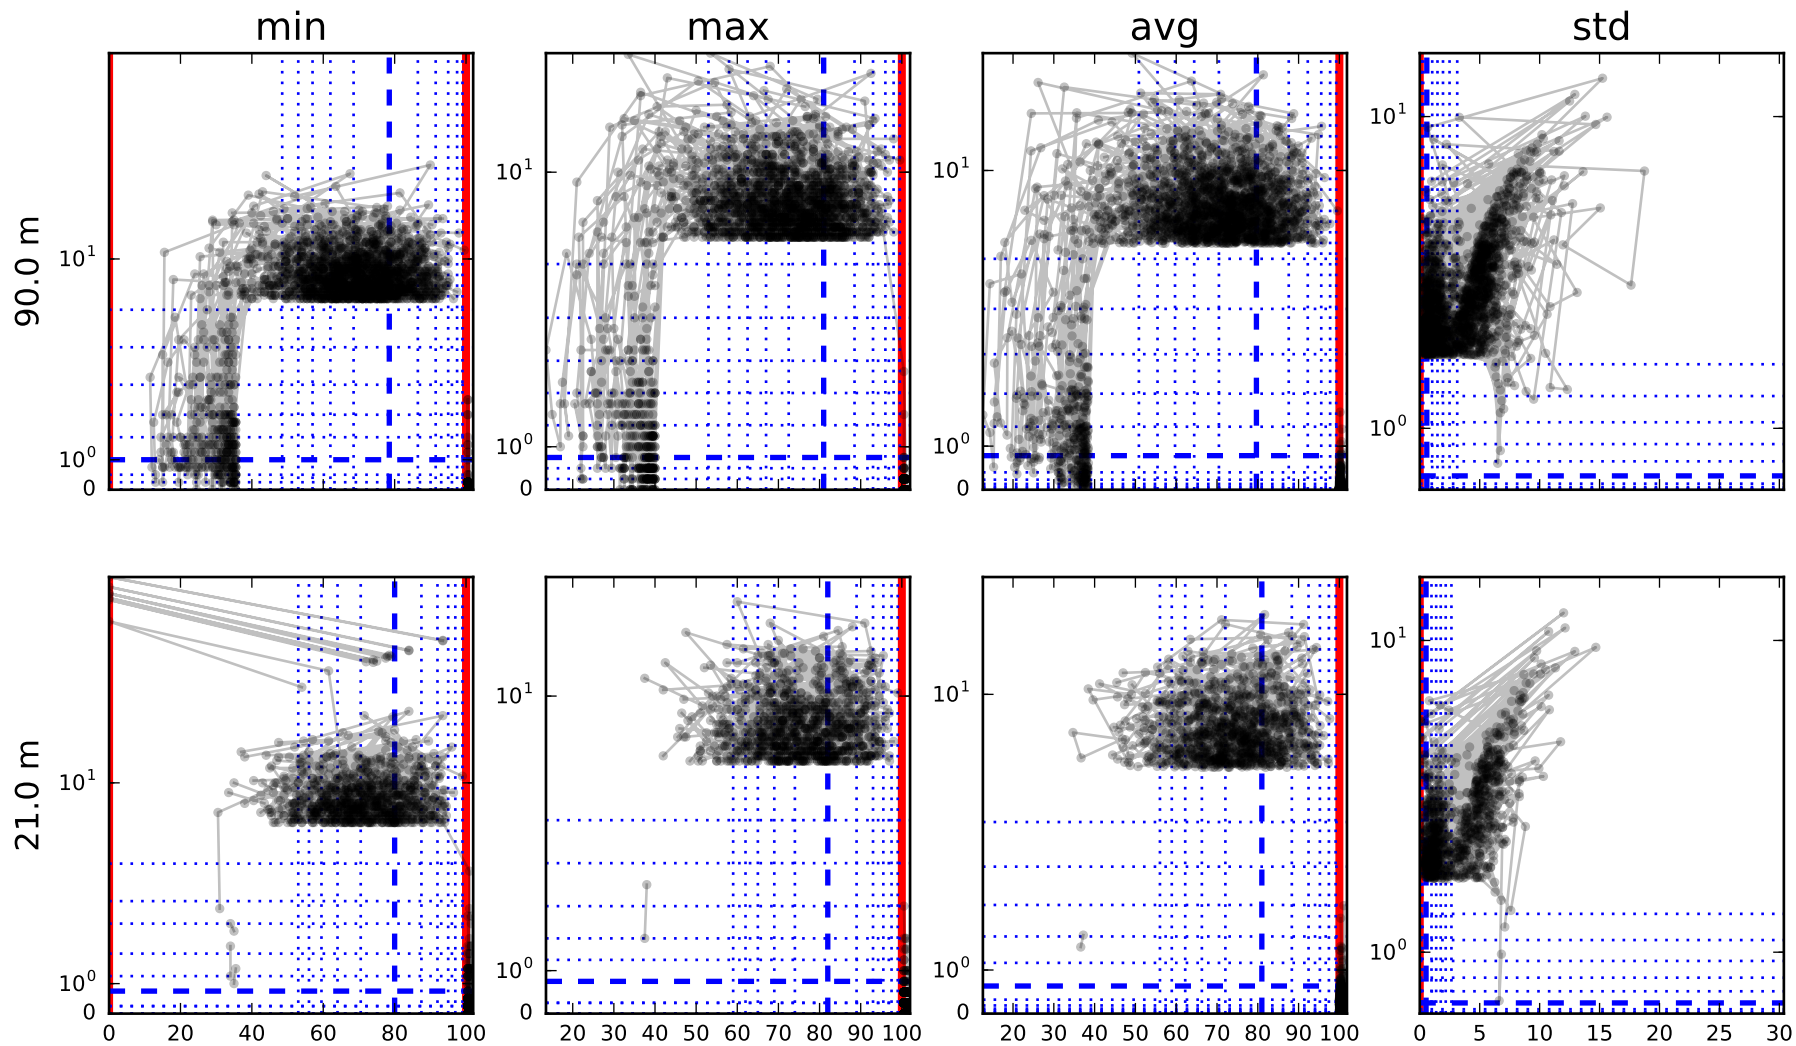

Supplement: Supplementary file 52 [file wes-2019-42-supplement.zip]

OWEZ AWAC/wt (water temperature, units: °C)

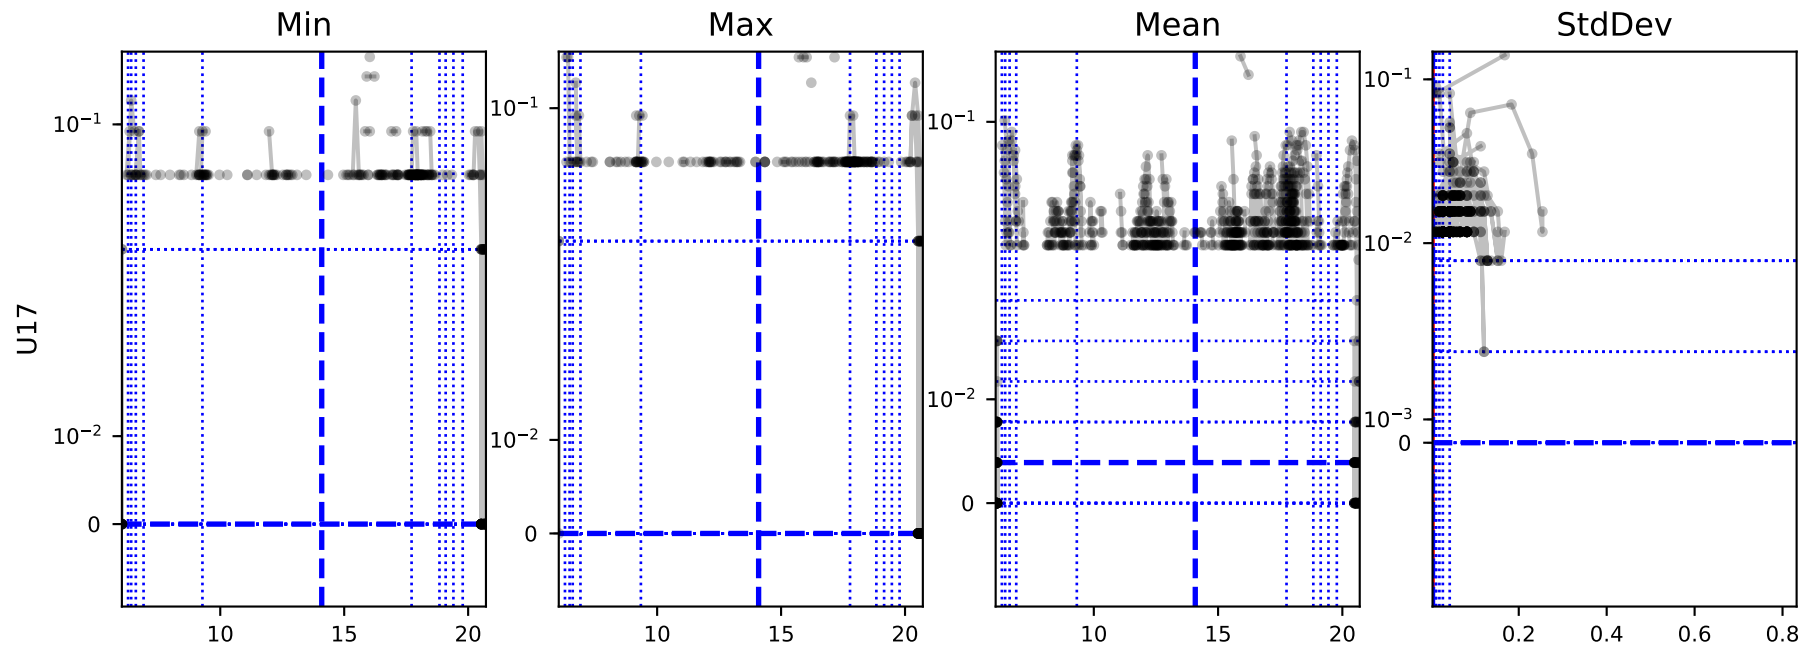

Supplement: Supplementary file 53 [file wes-2019-42-supplement.zip]

MMIJ HMP/Tair (air temperature, units: °C)

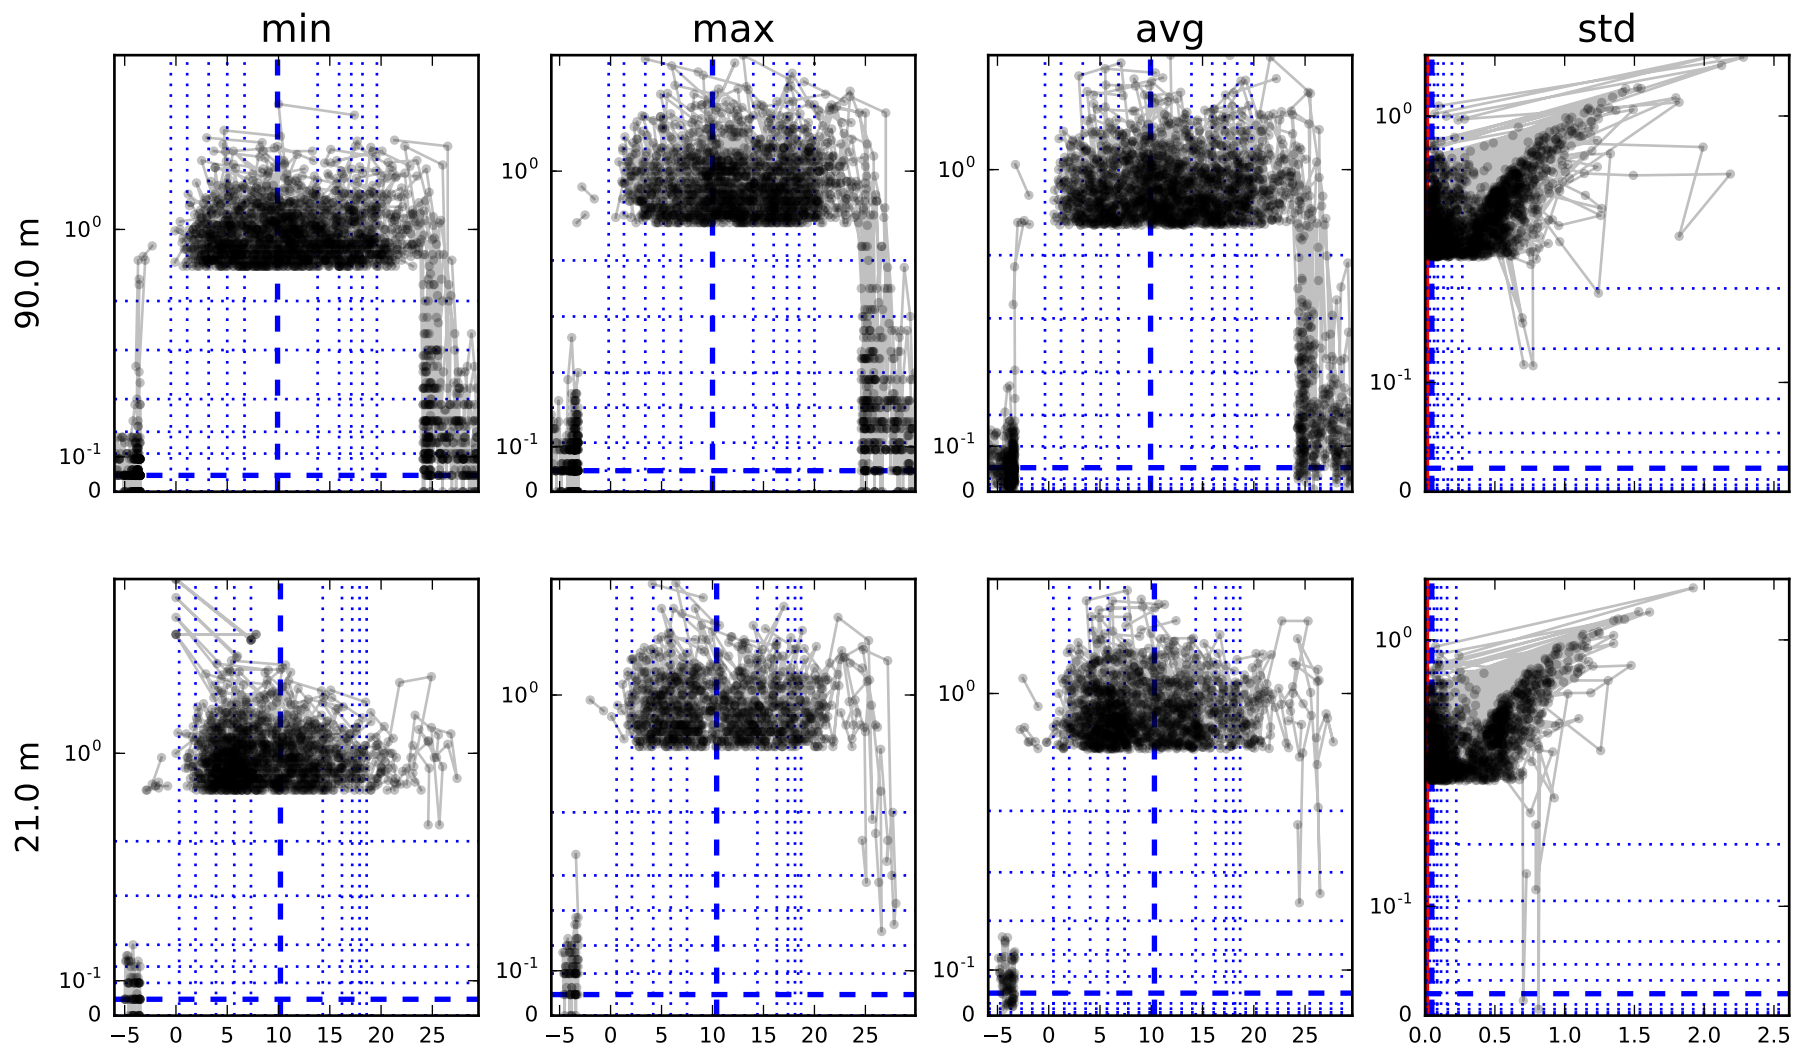

Supplement: Supplementary file 54 [file wes-2019-42-supplement.zip]
